# Supplementary material
Source: PubMed Central journal article supplement (PMC7487124)
Supplement: NIHMS1614864-supplement-supplementary_material.pdf [file NIHMS1614864-supplement-supplementary_material.pdf]

## ***Supporting Information***

### **Characterization by Empirical and Computational Methods of Dictyospiromide, an Intriguing Antioxidant Alkaloid from the Marine Alga *Dictyota coriacea***

Pengcheng Yan,<sup>\*,a</sup> Ge Li,<sup>a</sup> Chaojie Wang,<sup>a</sup> Jianzhang Wu,<sup>\*,a</sup> Zhongmin Sun<sup>b</sup>, Gary E. Martin<sup>c</sup>,  
Xiao Wang,<sup>d</sup> Mikhail Reibarkh,<sup>d</sup> Josep Saurí,<sup>e</sup> Kirk R. Gustafson<sup>\*,f</sup>

<sup>a</sup> School of Pharmaceutical Sciences, Wenzhou Medical University, Wenzhou, Zhejiang 325035, People's Republic of China. E-mail: [yanpc@wmu.edu.cn](mailto:yanpc@wmu.edu.cn) (P. Yan); [wujianzhang@wmu.edu.cn](mailto:wujianzhang@wmu.edu.cn) (J. Wu).

<sup>b</sup> Institute of Oceanology, Chinese Academy of Sciences, Qingdao 266071, People's Republic of China.

<sup>c</sup> Department of Chemistry and Biochemistry, Seton Hall University, South Orange, NJ, USA.

<sup>d</sup> Structure Elucidation Group, Analytical Research and Development, Merck & Co., Rahway, NJ, USA.

<sup>e</sup> Structure Elucidation Group, Analytical Research and Development, Merck & Co., Boston, MA, USA.

<sup>f</sup> Molecular Targets Program, Center for Cancer Research, National Cancer Institute, Frederick, Maryland, 21702-1201, USA. E-mail: [gustafki@mail.nih.gov](mailto:gustafki@mail.nih.gov)

## Supporting Information

### Experimental Details

#### Structure Elucidation

**Figure S1.** Structure of dictyospiromide (**1**) and COSY and key HMBC correlations.

**Table S1.**  $^1\text{H}$  and  $^{13}\text{C}$  NMR spectroscopic data for dictyospiromide (**1**).

**Figure S2.**  $^1\text{H}$  NMR spectrum (600 MHz) of dictyospiromide (**1**) in  $(\text{CD}_3)_2\text{CO}$ .

**Figure S3.** Expanded  $^1\text{H}$  NMR spectrum (600 MHz) of dictyospiromide (**1**) in  $(\text{CD}_3)_2\text{CO}$ .

**Figure S4.**  $^{13}\text{C}$  NMR spectrum (150 MHz) of dictyospiromide (**1**) in  $(\text{CD}_3)_2\text{CO}$ .

**Figure S5.** HMQC spectrum of dictyospiromide (**1**) in  $(\text{CD}_3)_2\text{CO}$ .

**Figure S6.** HMBC spectrum of dictyospiromide (**1**) in  $(\text{CD}_3)_2\text{CO}$ .

**Figure S7.** COSY spectrum of dictyospiromide (**1**) in  $(\text{CD}_3)_2\text{CO}$ .

**Figure S8.** NOESY spectrum of dictyospiromide (**1**) in  $(\text{CD}_3)_2\text{CO}$ .

**Figure S9.**  $^1\text{H}$  NMR spectrum (600 MHz) of dictyospiromide (**1**) in  $\text{CDCl}_3$ .

**Figure S10.**  $^{13}\text{C}$  NMR spectrum (150 MHz) of dictyospiromide (**1**) in  $\text{CDCl}_3$ .

**Figure S11.**  $^1\text{H}$ - $^{13}\text{C}$  ps-HSQC spectrum of dictyospiromide (**1**) in  $\text{CDCl}_3$ .

**Figure S12.** HMBC spectrum of dictyospiromide (**1**) in  $\text{CDCl}_3$ .

**Figure S13.** COSY spectrum of dictyospiromide (**1**) in  $\text{CDCl}_3$ .

**Figure S14.** ROESY spectrum of dictyospiromide (**1**) in  $\text{CDCl}_3$ .

**Figure S15.** HRESIMS spectrum of dictyospiromide (**1**).

**Figure S16.** CD spectrum for  $\text{Rh}_2(\text{OCOCF}_3)_4$  complex of dictyospiromide (**1**).

#### Biological Characterization

##### Anisotropic NMR Data Acquisition

**Figure S17.**  $^{13}\text{C}$  spectra from which experimental residual chemical shift anisotropy (RCSA) values are obtained.

**Table S2.** Residual chemical shift anisotropy values.

##### Procedure for DFT Geometry Optimization and Chemical Shift Calculation

##### Superposition of Low Energy Conformers

**Figure S18.** Superposition of 20 conformers (above 2% Boltzmann population) **1a** (1E2R).

**Figure S19.** Superposition of 14 conformers (above 2% Boltzmann population) **1b** (1Z2R).

**Figure S20.** Superposition of 18 conformers (above 2% Boltzmann population) **1c** (1E2S).

**Figure 21.** Superposition of 19 conformers (above 2% Boltzmann population) **1d** (1Z2S).

**Table S3.** List of conformers obtained from DFT calculations for **1a**.

**Table S4.** List of conformers obtained from DFT calculations for **1b**.

**Table S5.** List of conformers obtained from DFT calculations for **1c**.

**Table S6.** List of conformers obtained from DFT calculations for **1d**.

**Standard Q Factors and CSA Weighted Q Factors**

**Table S7.** Measured Q and  $Q_{(CSA)}$  factors using single tensor fitting.

**Cartesian Coordinates of Conformers (>2% population) of 1a**

**Cartesian Coordinates of Conformers (>2% population) of 1b**

**Cartesian Coordinates of Conformers (>2% population) of 1c**

**Cartesian Coordinates of Conformers (>2% population) of 1d**

## Experimental Details

**General Procedures.** NMR spectra were recorded on a Bruker Avance III NMR spectrometer operating at 600 MHz for  $^1\text{H}$  and 150 MHz for  $^{13}\text{C}$ . TMS was used as an internal standard. UV, IR spectra and optical rotations were measured with a TU 1901 spectrometer, a Bruker Equinox 55 spectrometer, and a PoLAAR 3005 digital polarimeter, respectively. ECD spectra were acquired with a Chirascan circular dichroism spectrometer. (+) HRESIMS data were recorded on a Thermo Scientific Q Exactive hybrid quadrupole-Orbitrap mass spectrometer. Column chromatography was performed using Silica gel (200–300 mesh, Qingdao Marine Chemistry Co. Ltd.), ODS (50  $\mu\text{m}$ , YMC), and Sephadex LH-20 (GE Healthcare Bio-sciences AB). HPLC separation was run on an Agilent 1100 series instrument using a YMC-Pack  $\text{C}_{18}$  column (10  $\mu\text{m}$ , 250  $\times$  10 mm) and a VWD G1314A detector.

**Plant Material.** Specimens of the brown alga *Dictyota coriacea* were collected from the coast of Nanji Island, Wenzhou, Zhejiang Province, China, in June 2015. The identification was carried out by one of the authors (Z.S.). A voucher specimen of the alga (ZN201501) was deposited at the Laboratory of Marine Natural Products Chemistry, Wenzhou Medical University, China.

**Extraction and Isolation.** The air-dried algal material (700 g) was extracted with 95% EtOH at room temperature. The concentrated extract was partitioned between  $\text{H}_2\text{O}$  and EtOAc. Evaporation of EtOAc *in vacuo* afforded a dark residue of 25.0 g. The EtOAc fraction was separated by silica gel vacuum column chromatography, eluting with a gradient of EtOAc/petroleum ether (1:20, 1:10, 1:5, 1:3, 1:2, and 1:1), to obtain six fractions (A–F). Fraction C (4.9 g) was separated on a Sephadex LH-20 column, eluting with petroleum ether/ $\text{CH}_2\text{Cl}_2$ /MeOH (5:5:1), to obtain three fractions (C1–C3). Fraction C2 (345.0 mg) was subjected to an ODS column, eluting with a gradient of MeOH/ $\text{H}_2\text{O}$  (75:25, 80:20, 85:15, and 90:10), to afford four fractions (C2a–C2d). Fraction C2a (5.5 mg) was purified by  $\text{C}_{18}$  HPLC (MeOH/ $\text{H}_2\text{O}$ , 85:15) to yield dictyospiromide (**1**, 4.0 mg).

*Dictyospiromide (1)*: colorless oil;  $[\alpha]_{\text{D}}^{25} -80$  (*c* 0.05, MeOH); UV (MeOH)  $\lambda_{\text{max}}$  ( $\log \epsilon$ ) 209 (3.63), 262 (3.82) nm; IR (KBr)  $\nu_{\text{max}}$  3446, 2966, 2919, 1701, 1652, 1458, 1225, 1101  $\text{cm}^{-1}$ ;  $^1\text{H}$  and  $^{13}\text{C}$  NMR data, Table 1; HRESIMS  $m/z$  398.2298 [ $\text{M} + \text{Na}$ ] $^+$  (Calcd for  $\text{C}_{22}\text{H}_{33}\text{NO}_4\text{Na}$ , 398.2307).

**ECD Calculations.** Structures for the four isomers of **1** [(1*E*, 2*S*), (1*Z*, 2*S*), (1*E*, 2*R*), and (1*Z*, 2*R*)] were fully optimized at the CAM-B3LYP/6-311G (2*d*, *p*) level. Then the ECD calculations were performed at the B3LYP/Def2-TZVP level. The solvent effects were taken into account in

all calculations by using the Polarizable Continuum Model (PCM, methanol as the solvent). All quantum mechanical calculations were carried out using the Gaussian 09 program package.

**Cell Culture.** The rat pheochromocytoma PC12 cell line was provided by the Cell Storage Center of Wuhan University. Cells were cultured in Dulbecco's modified Eagle's medium (DMEM; Gibco) containing 100  $\mu\text{g}/\text{mL}$  streptomycin, 100 U/mL penicillin, and 10% fetal bovine serum (FBS; Gibco), at 37 °C with 5% CO<sub>2</sub>.

**MTT Assay.** Cell viability was detected by the 3-(4,5-dimethyl-2-thiazolyl)-2,5-diphenyl-2H-tetrazolium bromide (MTT; 0.5 mg/mL; Sigma) assay. PC12 cells were cultured at a density of  $5 \times 10^3$  per well for 24 h in 96-well plates (NEST Biotechnology Co. LTD) then treated with **1** and TBHQ for 18 h. H<sub>2</sub>O<sub>2</sub> (450  $\mu\text{M}$ ; Sinopharm Chemical) was added for an additional 24 h. The cells were cultured with 20  $\mu\text{L}$  MTT solution at 37 °C for 4 h. The crystals were dissolved in 120  $\mu\text{L}$  dimethyl sulfoxide (DMSO; Sigma) and the UV absorbance at 490 nm was determined with a microplate reader (Thermo Fisher Scientific). The cell viability was calculated by the formula: cell viability (%) = [OD<sub>490</sub> (experiment group)/OD<sub>490</sub> (DMSO group)]  $\times$  100%.

**LDH Assay.** PC12 cells were seeded in 96-well plates (NEST Biotechnology Co. LTD) at a density of  $5 \times 10^3$  per well for 24 h. The cell treatments with compound and H<sub>2</sub>O<sub>2</sub> were the same as those described in the MTT assay. The next procedures were exactly followed according to the manufacturer's protocols from the lactate dehydrogenase (LDH) release cytotoxicity detection kit (Beyotime Biotech). Absorbance was measured at 490 nm using a microplate reader (Thermo Fisher Scientific).

**Immunostaining of Nrf2.** PC12 cells were cultured in 6-well plate (NEST Biotechnology Co. LTD) at a density of  $3 \times 10^5$  per well for 24 h and then treated with **1** and TBHQ for 6 h. For immunofluorescence staining, PC12 cells were fixed with 4% paraformaldehyde at 37 °C for 20 min, followed by a 15 min permeabilization with 1% Triton X-100 (Sigma-Aldrich). Then, cells were rinsed three times with PBS buffer and blocked with 1% bovine serum albumin (BSA) at 37 °C for 1 h. After removing blocking buffer, cells were cultured with a 1:200 dilution of primary antibody for Nrf2 (sc-13032, Santa Cruz Biotechnology) at 4 °C overnight. After washing with PBS, cells were incubated with secondary antibody (sc-13032, goat anti-rabbit IgG-PE, Santa Cruz Biotechnology, 1:300) for 1 h at 37 °C and treated with DAPI (Beyotime Biotech) for 8 min. Then, cells were photographed with a fluorescence microscope (Nikon).

**Western Blot Analysis.** PC12 cells were seeded in 6-well plate at a density of  $5 \times 10^5$  per well for 24 h, then treated with **1** and TBHQ for 18 h and lysed with ice-cold radio-immunoprecipitation assay (RIPA) lysis buffer, followed by centrifugation at  $1.2 \times 10^4$  rpm for 10 min at 4 °C. Total

protein content in cells was determined by Bradford's method. Equal amounts of total protein were separated by 10% sodium dodecyl sulfate-polyacrylamide gel electrophoresis (SDS-PAGE) and then transferred onto a PVDF membrane (Millipore). The membrane was blocked with 5% non-fat milk in Tris-buffered saline containing 0.1% Tween 20 (TBST) at 37 °C for 2 h, and cultured with the primary antibodies against HO-1 (sc-10789, Santa Cruz Biotech Co. Ltd., 1:500) and  $\beta$ -actin (AP0060, Bioworld Technology, 1:3000) at 4 °C overnight, and followed by incubation with horseradish peroxidase labeled secondary antibodies (1:5000) at 37 °C for 1 h. After washing with TBST, antibody-bound proteins were detected using a ChemiDoc XRS + system (Bio-Rad) and immunoreactive labeling was analyzed with Image J software (NIH).

**Transfection Assay.** Nrf2 siRNA and control siRNA were purchased from GenePharma. The transfection of Nrf2 siRNA or control siRNA was performed using Lipofectamine 2000 reagent (Invitrogen) following the manufacturer's instructions. After a 10 h transfection, cells were collected and seeded into 96-well plates at a density of  $5 \times 10^3$  per well. After that, cells were incubated with 2  $\mu$ M **1** for 18 h and treated with 450  $\mu$ M H<sub>2</sub>O<sub>2</sub> for another 24 h. Cell viability was determined by MTT assay.

## Structure Elucidation

Dictyospiromide (**1**) had a molecular formula of  $C_{22}H_{33}NO_4$  according to its HRESIMS data, which implied seven degrees of unsaturation. The  $^{13}C$  NMR spectrum (in acetone- $d_6$ ) displayed 22 carbon signals including two carbonyls ( $\delta_C$  182.0, C-18; 171.8, C-19) and six additional  $sp^2$  carbons (Table S1), which indicated that **1** was bicyclic. The presence of a monosubstituted olefinic double bond was revealed by  $^1H$  NMR signals (in acetone- $d_6$ ) at  $\delta_H$  5.93 (dd,  $J = 16.8$ , 10.2 Hz, H-7), 4.97 (d,  $J = 16.8$  Hz, H-8a), and 4.95 (d,  $J = 10.2$  Hz, H-8b) and  $^{13}C$  NMR signals at  $\delta_C$  145.9 (CH, C-7) and 111.8 (CH<sub>2</sub>, C-8), as well as COSY correlations between H-7 and H<sub>2</sub>-8 (Figure S1). An exocyclic double bond with an ethoxy substituent was established by  $^1H$  NMR signals for an olefinic proton ( $\delta_H$  7.33, s, H-9), an oxymethylene ( $\delta_H$  4.19, q,  $J = 7.2$  Hz), and a methyl triplet ( $\delta_H$  1.34, t,  $J = 7.2$  Hz) and  $^{13}C$  NMR signals at  $\delta_C$  155.4 (CH, C-9), 109.6 (C, C-1), 72.0 (CH<sub>2</sub>, OEt), and 15.7 (CH<sub>3</sub>, OEt), in combination with a COSY correlation between the oxymethylene and methyl triplet and HMBC correlations from the olefinic proton H-9 to an olefinic nonprotonated carbon C-1 and from the oxymethylene protons to the olefinic methine carbon C-9. A 6-methylhept-5-en-2-yl side chain was established based on COSY correlations between H-13 ( $\delta_H$  4.99, t,  $J = 7.2$  Hz)/H<sub>2</sub>-12 ( $\delta_H$  1.99, m; 1.83, m), H<sub>2</sub>-12/H<sub>2</sub>-11 ( $\delta_H$  1.38, m; 1.12, m), H<sub>2</sub>-11/H-10 ( $\delta_H$  1.84, m), and H-10/H<sub>3</sub>-17 ( $\delta_H$  0.97, d,  $J = 6.0$  Hz), as well as HMBC correlations from two olefinic methyls H<sub>3</sub>-15 ( $\delta_H$  1.55, s) and H<sub>3</sub>-16 ( $\delta_H$  1.62, s) to two olefinic carbons C-13 ( $\delta_C$  125.3, CH) and C-14 ( $\delta_C$  131.8, C) and from H<sub>3</sub>-17 to an aliphatic methine carbon C-10 ( $\delta_C$  31.7, CH) and an aliphatic methylene carbon C-11 ( $\delta_C$  34.6, CH<sub>2</sub>). COSY correlations between H-3 ( $\delta_H$  2.78, dd,  $J = 10.2$ , 7.2 Hz)/H-4 ( $\delta_H$  4.28, m), and H-4/H<sub>2</sub>-5 ( $\delta_H$  2.51, dd,  $J = 14.4$ , 7.8 Hz; 1.71, dd,  $J = 14.4$ , 4.2 Hz) and HMBC correlations from both a methyl singlet H<sub>3</sub>-20 ( $\delta_H$  1.00, s) and H-3 to two nonprotonated carbons C-2 ( $\delta_C$  65.4, C) and C-6 ( $\delta_C$  53.2, C) and from H<sub>3</sub>-20 to a methylene carbon C-5 ( $\delta_C$  46.9, CH<sub>2</sub>) led to the establishment of a cyclopentane ring and revealed that C-4 ( $\delta_C$  72.1, CH) was hydroxylated and C-6 was substituted by a methyl group. An HMBC correlation from H<sub>3</sub>-20 to an olefinic carbon C-7 indicated that C-6 was joined to the monosubstituted olefin residue established above, while an HMBC correlation from H<sub>3</sub>-17 to a methine carbon C-3 ( $\delta_C$  51.1, CH) and a COSY correlation between H-3 and H-10 ( $\delta_H$  1.84, m) revealed that the 6-methylhept-5-en-2-yl side chain was attached to C-3. HMBC correlations from H-3 to C-1 and the C-18 carbonyl carbon, and from H-9 to C-2 suggested that C-2 was connected to both C-18 and the exocyclic double bond. In addition, an HMBC correlation from H-9 to the C-19 carbonyl carbon revealed that the ethoxy substituted exocyclic double bond was conjugated to C-19. An NH group remained to be assigned according to the HRESIMS data, and it was

positioned between the two carbonyl carbons to form a succinimide moiety based on the chemical shifts of C-18 ( $\delta_C$  182.0), C-19 ( $\delta_C$  171.8), and the NH proton ( $\delta_H$  10.13, br s). This was confirmed by HMBC correlations (in  $CDCl_3$ ) from the NH proton ( $\delta_H$  8.15, br s) to C-1 ( $\delta_C$  108.4, C) and C-2 ( $\delta_C$  64.8, C).

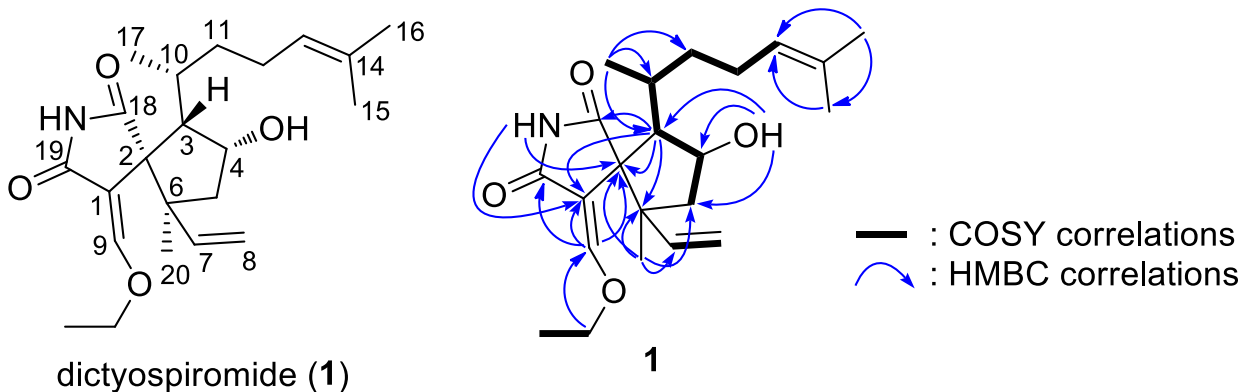

**Figure S1.** Structure of dictyosporomide (**1**) and COSY and key HMBC correlations

The relative configurations at C-3, C-4, C-6, and C-10 in **1** were determined by NOESY analysis (in acetone- $d_6$ ). NOESY correlations between H-3/H<sub>3</sub>-17, H-4/H<sub>3</sub>-17, and 4-OH ( $\delta_H$  3.79, d,  $J$  = 12.0 Hz)/H-10 suggested the assignment of a  $3S^*,4R^*,10R^*$  configuration, while a NOESY correlation between H-7 and H-3 was indicative of  $6S^*$  (Figure 2). The rare large proton-proton coupling (12.0 Hz) between 4-OH and H-4 implied that the rotation around C-4/O bond was restricted probably because 4-OH and a carbonyl had an inclination to form a hydrogen bridge in the dominant conformation; thus the relative configuration at C-2 was tentatively assigned as  $R^*$ , in this case, the 4-OH could be adjacent to C-18 carbonyl in the space. In addition, the geometry of the exocyclic double bond was suggested to be  $E$  based on the chemical shift of H-9 ( $\delta_H$  7.33, s) and the absence of NOE correlation between H-9/H-3 or H-9/H-7. The absolute configuration at C-4 was determined by an *in situ*  $Rh_2(OCOCF_3)_4$  CD method, according to which the sign of the E band (350 nm) in the induced CD (ICD) spectrum reflected the absolute configuration of secondary alcohol by applying the bulkiness rule.<sup>1S,2S</sup> A metal complex as an auxiliary chromophore was generated after addition of  $Rh_2(OCOCF_3)_4$  into a  $CHCl_3$  solution of **1** and the ICD spectrum was acquired. The negative CD effect (Figure 3) observed at 350 nm was in agreement with a  $4R$  configuration. Therefore, the absolute configurations at C-2, C-3, C-6, and C-10 were defined as  $R, S, S,$  and  $R,$  respectively. In order to support this assignment, the ECD data calculations were carried out for four possible isomers of **1** [**1a** ( $1E,2S$ ), **1b** ( $1Z,2S$ ), **1c**



(1*E*,2*R*), and **1d** (1*Z*,2*R*)] at the B3LYP/def2-TZVP level (Figure 4) and the measured ECD spectrum of **1** was similar to the calculated ECD spectrum for the isomer **1c** (1*E*,2*R*).

#### References

- 1S M. Gerards, G. Snatzke, *Tetrahedron: Asymmetry* 1990, **1**, 221.
- 2S Frelek, W. J. Szczepiek, *Tetrahedron: Asymmetry* 1999, **10**, 1507.

**Table S1.**  $^1\text{H}$  and  $^{13}\text{C}$  NMR Spectroscopic Data for Dictyospiromide (**1**)<sup>a</sup>

| Pos. | $(\text{CD}_3)_2\text{CO}$                   |                                                | $\text{CDCl}_3$                        |                                                |
|------|----------------------------------------------|------------------------------------------------|----------------------------------------|------------------------------------------------|
|      | $\delta_{\text{H}}$ mult. ( $J$ in Hz)       | $\delta_{\text{C}}$ , type                     | $\delta_{\text{H}}$ mult. ( $J$ in Hz) | $\delta_{\text{C}}$ , type                     |
| 1    |                                              | 109.6, C                                       |                                        | 108.4, C                                       |
| 2    |                                              | 65.4, C                                        |                                        | 64.8, C                                        |
| 3    | 2.78, dd (10.2, 7.2)                         | 51.1, CH                                       | 2.73, dd (10.2, 7.1)                   | 50.5, CH                                       |
| 4    | 4.28, m                                      | 72.1, CH                                       | 4.38, dtd (12.0, 7.8, 4.2)             | 71.8, CH                                       |
| 5    | 2.51, dd (14.4, 7.8)<br>1.71, dd (14.4, 4.2) | 46.9, CH <sub>2</sub>                          | 2.58, dd (14.9, 7.9)<br>1.81, m        | 45.8, CH <sub>2</sub>                          |
| 6    |                                              | 53.2, C                                        |                                        | 52.9, C                                        |
| 7    | 5.93, dd (16.8, 10.2)                        | 145.9, CH                                      | 5.84, dd (17.2, 10.7)                  | 144.3, CH                                      |
| 8    | 4.97, d (16.8)<br>4.95, d (10.2)             | 111.8, CH <sub>2</sub>                         | 4.95, m                                | 111.9, CH <sub>2</sub>                         |
| 9    | 7.33, s                                      | 155.4, CH                                      | 7.35, s                                | 155.1, CH                                      |
| 10   | 1.84, m                                      | 31.7, CH                                       | 1.85, m                                | 30.8, CH                                       |
| 11   | 1.38, m<br>1.12, m                           | 34.6, CH <sub>2</sub>                          | 1.29, m<br>1.07, m                     | 33.9, CH <sub>2</sub>                          |
| 12   | 1.99, m<br>1.83, m                           | 26.3, CH <sub>2</sub>                          | 1.99, m<br>1.83, m                     | 25.5, CH <sub>2</sub>                          |
| 13   | 4.99, t (7.2)                                | 125.3, CH                                      | 4.96, m                                | 124.3, CH                                      |
| 14   |                                              | 131.8, C                                       |                                        | 131.5, C                                       |
| 15   | 1.55, s                                      | 17.7, CH <sub>3</sub>                          | 1.56, s                                | 17.7, CH <sub>3</sub>                          |
| 16   | 1.62, s                                      | 25.8, CH <sub>3</sub>                          | 1.66, s                                | 25.7, CH <sub>3</sub>                          |
| 17   | 0.97, d (6.0)                                | 18.5, CH <sub>3</sub>                          | 1.00, d (6.3)                          | 18.2, CH <sub>3</sub>                          |
| 18   |                                              | 182.0, C                                       |                                        | 180.4, C                                       |
| 19   |                                              | 171.8, C                                       |                                        | 171.2, C                                       |
| 20   | 1.00, s                                      | 22.1, CH <sub>3</sub>                          | 1.05, s                                | 21.5, CH <sub>3</sub>                          |
| OEt  | 4.19, q (7.2)<br>1.34, t (7.2)               | 72.0, CH <sub>2</sub><br>15.7, CH <sub>3</sub> | 4.09, q (7.1)<br>1.35, t (7.1)         | 71.6, CH <sub>2</sub><br>15.3, CH <sub>3</sub> |
| NH   | 10.13, br s                                  |                                                | 8.15, br s                             |                                                |
| OH   | 3.79, d (12.0)                               |                                                | 3.78, d (12.0)                         |                                                |

<sup>a</sup> 600 MHz for  $^1\text{H}$  and 150 MHz for  $^{13}\text{C}$ .

**Figure S2.**  $^1\text{H}$  NMR spectrum (600 MHz) of dictyospiromide (**1**) in  $(\text{CD}_3)_2\text{CO}$ .

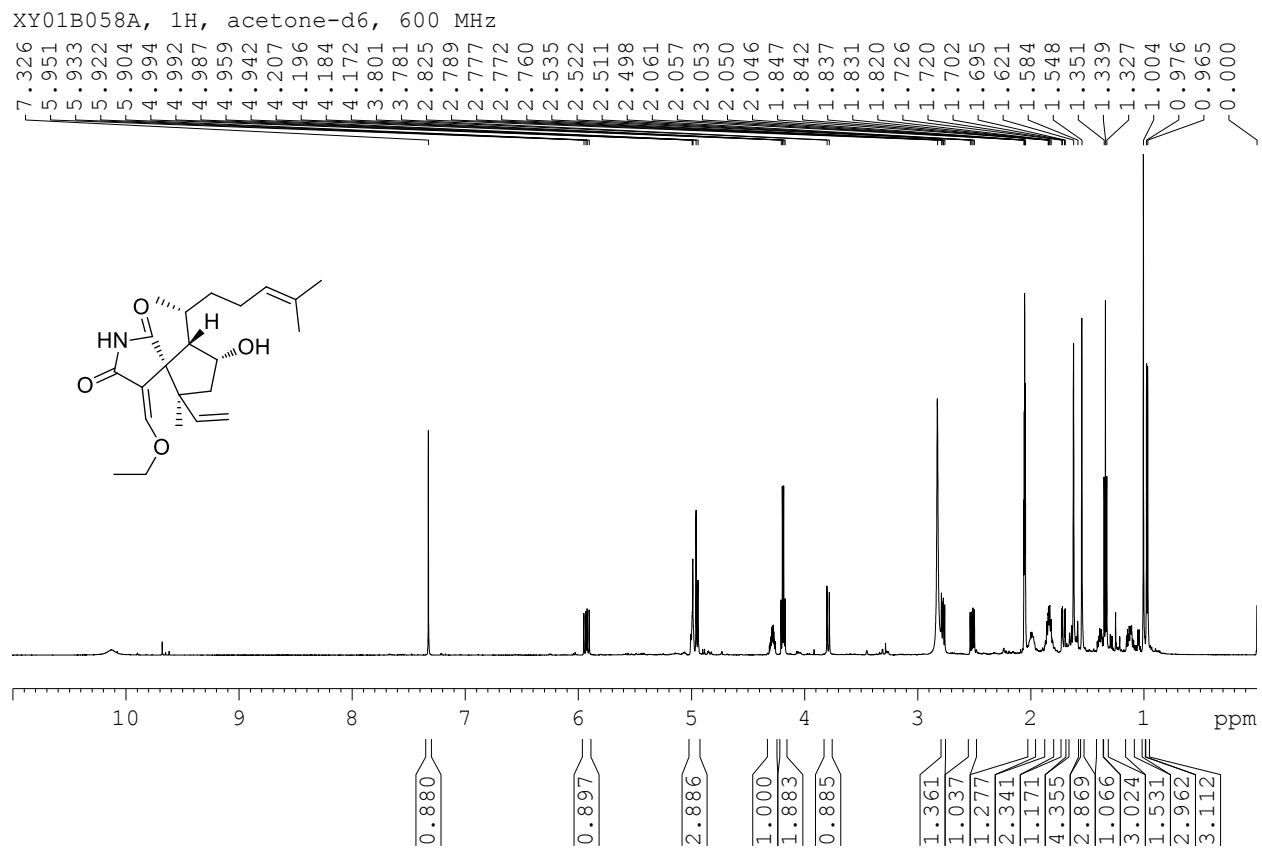

**Figure S3.** Enlarged  $^1\text{H}$  NMR spectrum (600 MHz) of dictyospiromide (**1**) in  $(\text{CD}_3)_2\text{CO}$ .

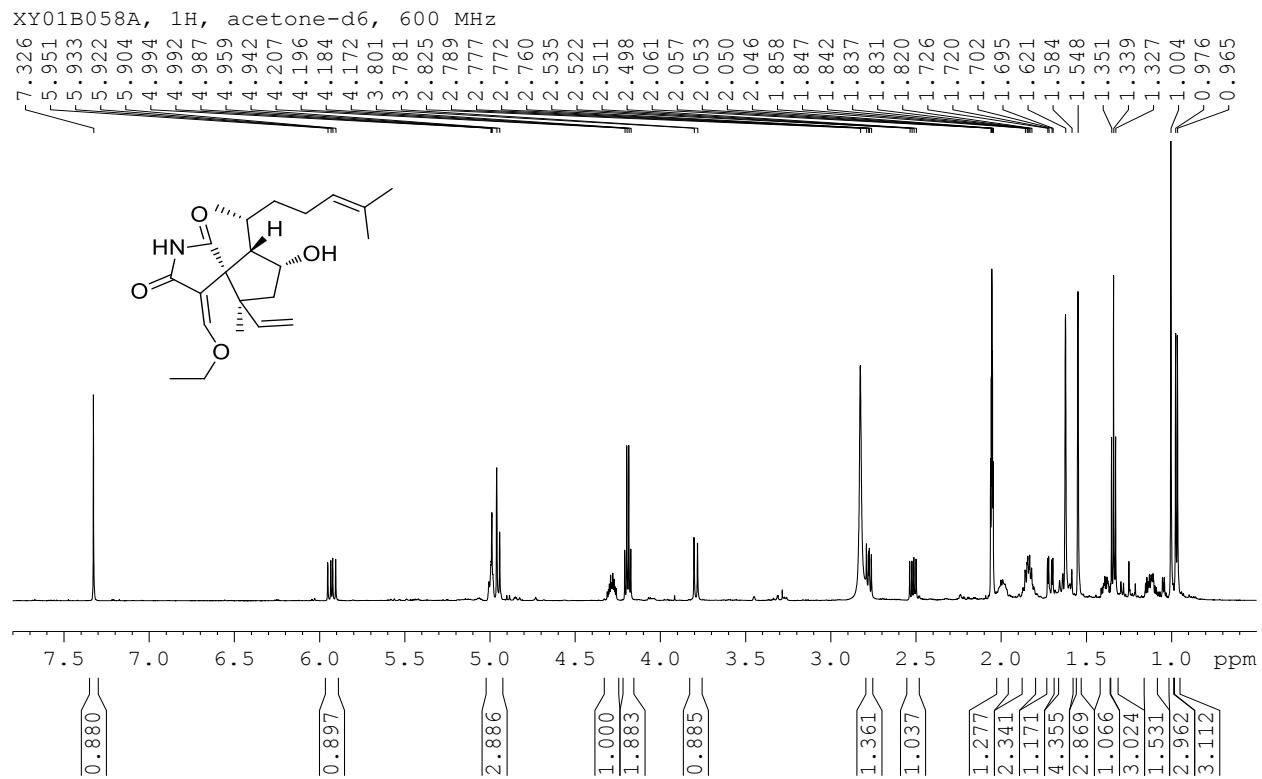

**Figure S4.**  $^{13}\text{C}$  NMR spectrum (150 MHz) of dictyospiromide (**1**) in  $(\text{CD}_3)_2\text{CO}$ .

XY01B058A,  $^{13}\text{C}$ , acetone- $d_6$ , 150 MHz

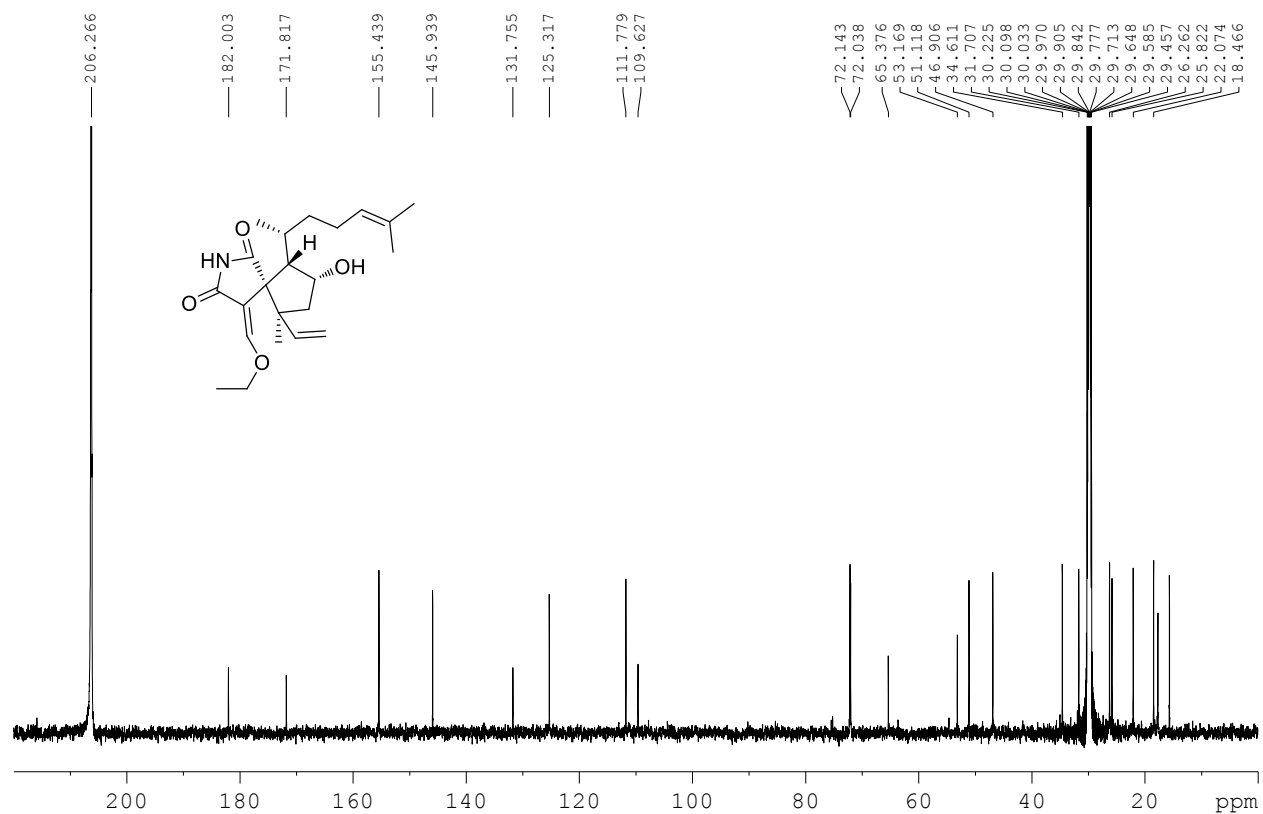

**Figure S5.** HMQC spectrum of dictyospiromide (**1**) in  $(\text{CD}_3)_2\text{CO}$ .

XY01B058A, HMQC, Acetone- $d_6$ , 600MHz

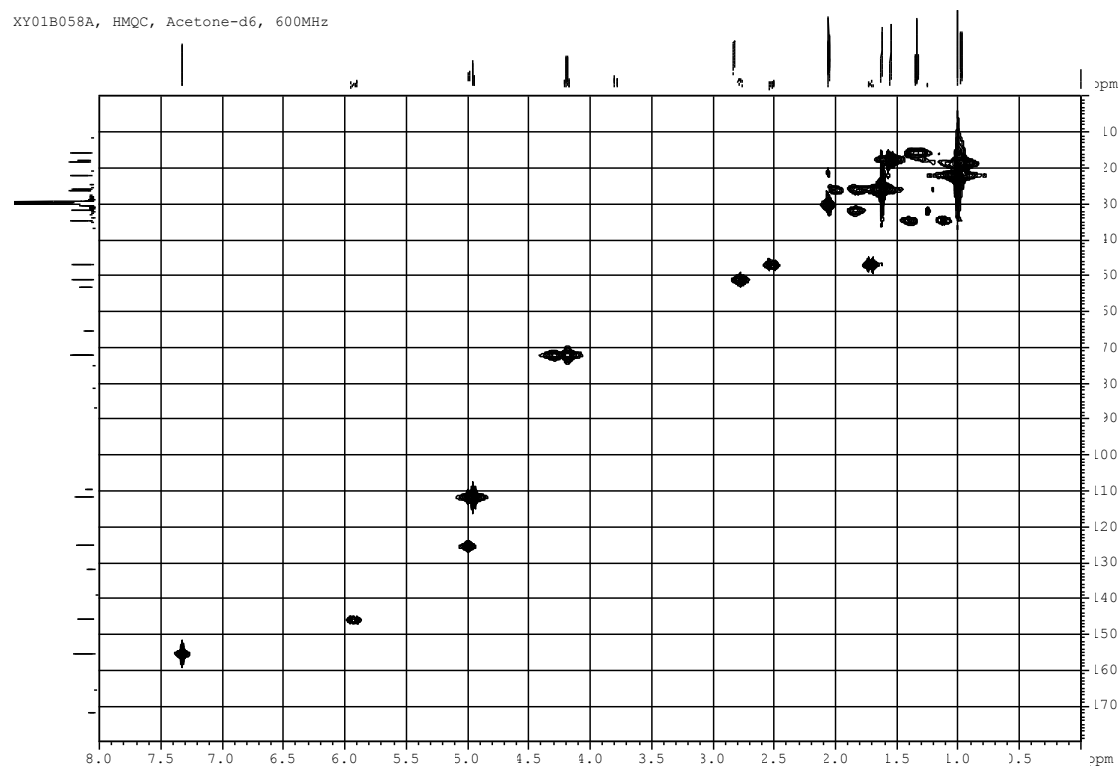

**Figure S6.** HMBC spectrum of dictyospiromide (**1**) in (CD<sub>3</sub>)<sub>2</sub>CO.

XY01B058A, HMBC, Acetone-d6, 600MHz

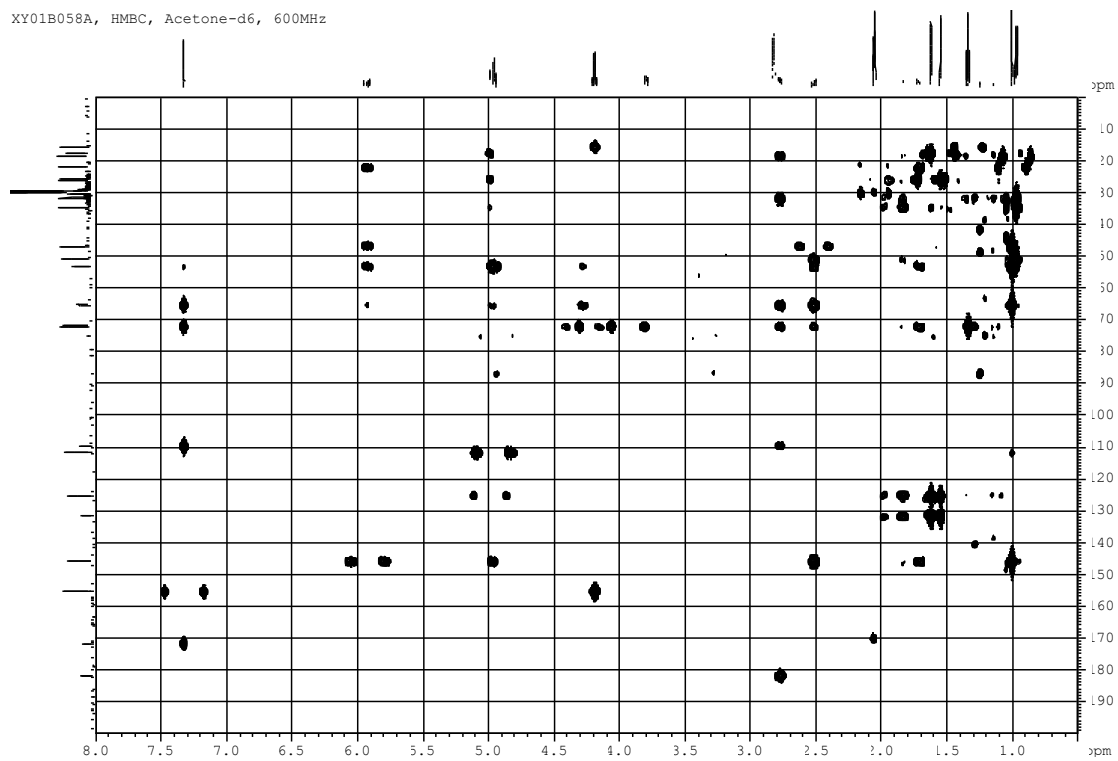

**Figure S7.** COSY spectrum of dictyospiromide (**1**) in (CD<sub>3</sub>)<sub>2</sub>CO.

XY01B058A, COSY, Acetone-d6, 600MHz

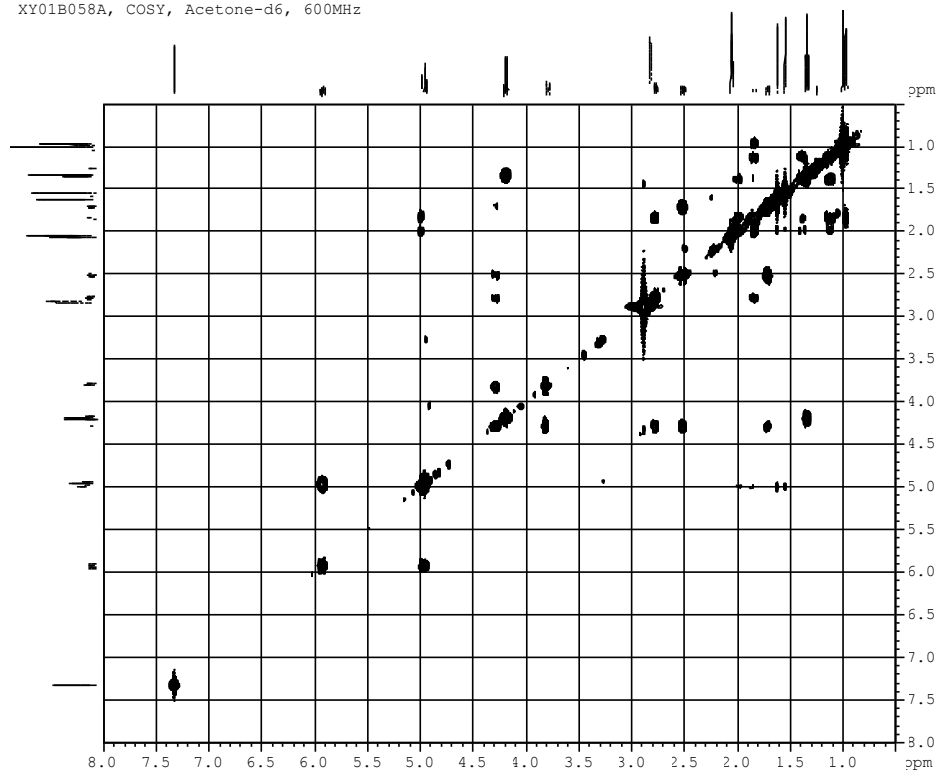

**Figure S8.** NOESY spectrum of dictyospiromide (**1**) in  $(\text{CD}_3)_2\text{CO}$ .

XY01B058A, NOESY, Acetone-d6, 600MHz

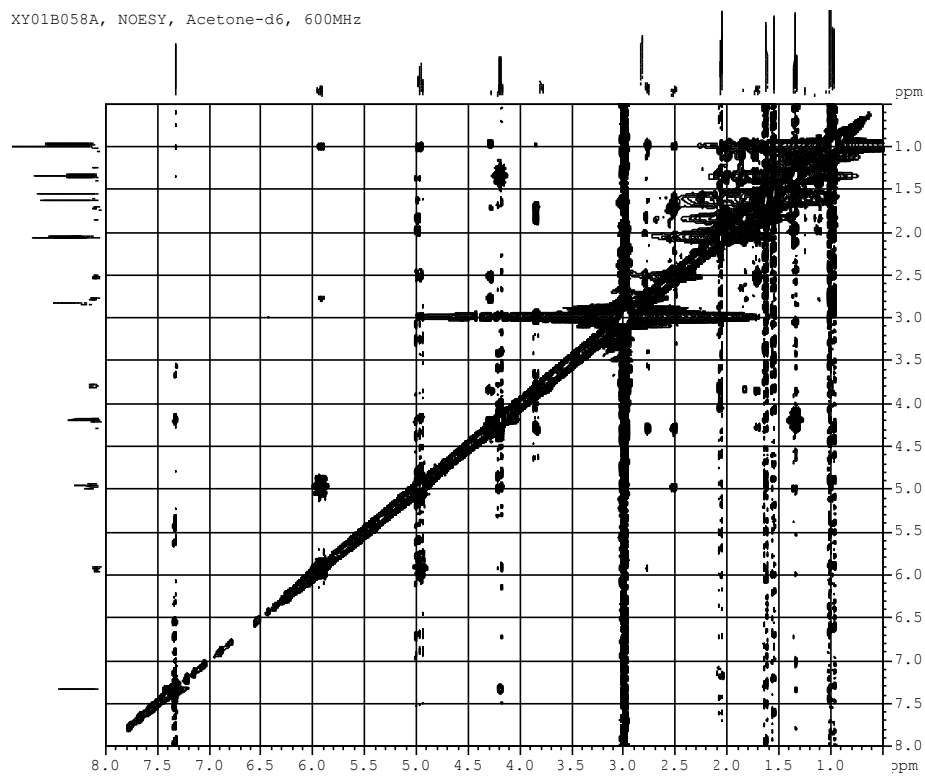

**Figure S9.**  $^1\text{H}$  NMR spectrum (600 MHz) of dictyospiromide (**1**) in  $\text{CDCl}_3$ .

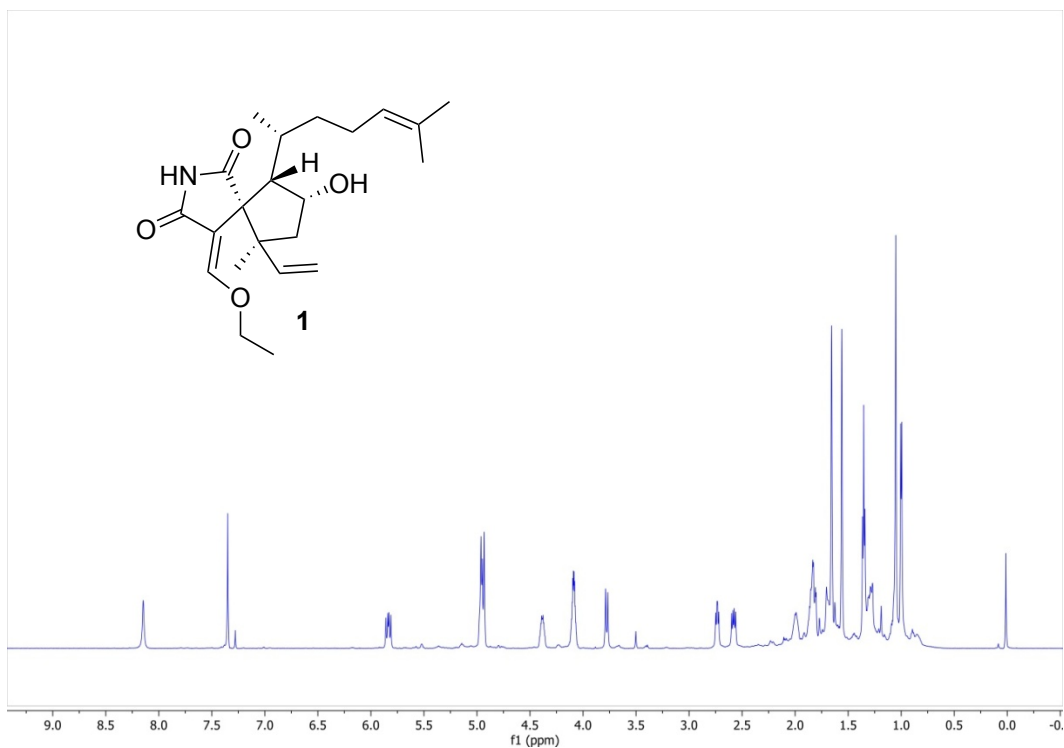

**Figure S10.**  $^{13}\text{C}$  NMR spectrum (150 MHz) of dictyospiromide (**1**) in  $\text{CDCl}_3$ .

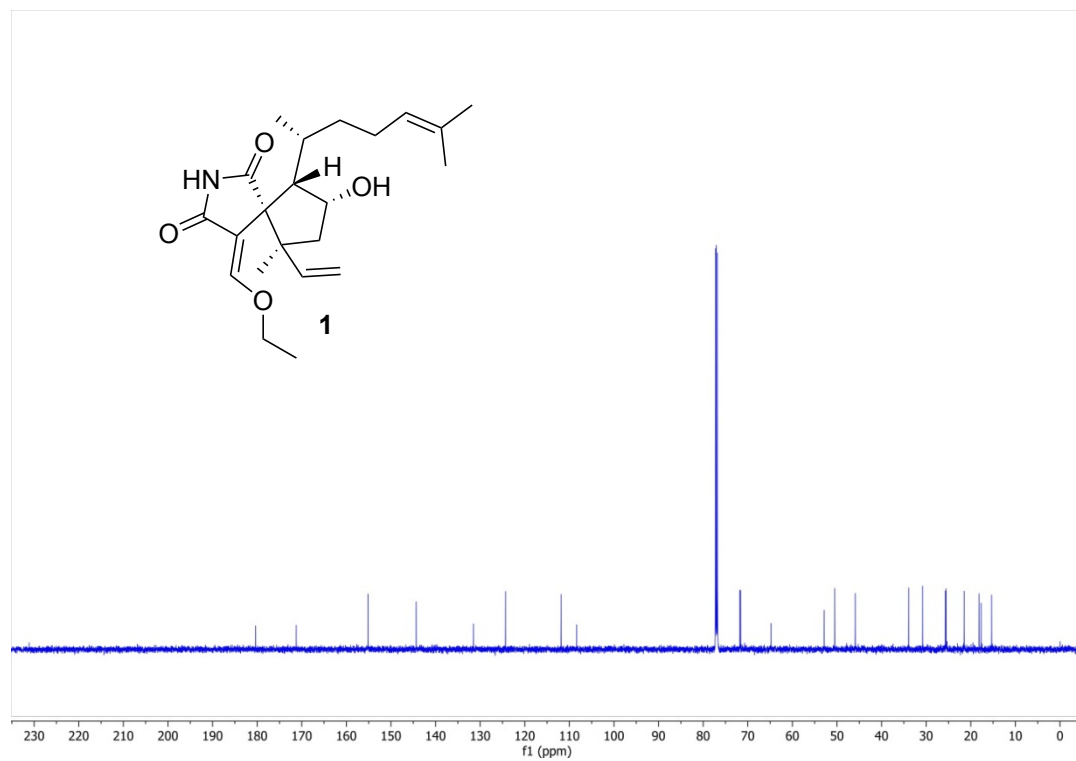

**Figure S11.**  $^1\text{H}$ - $^{13}\text{C}$  ps-HSQC spectrum of dictyospiromide (**1**) in  $\text{CDCl}_3$ .

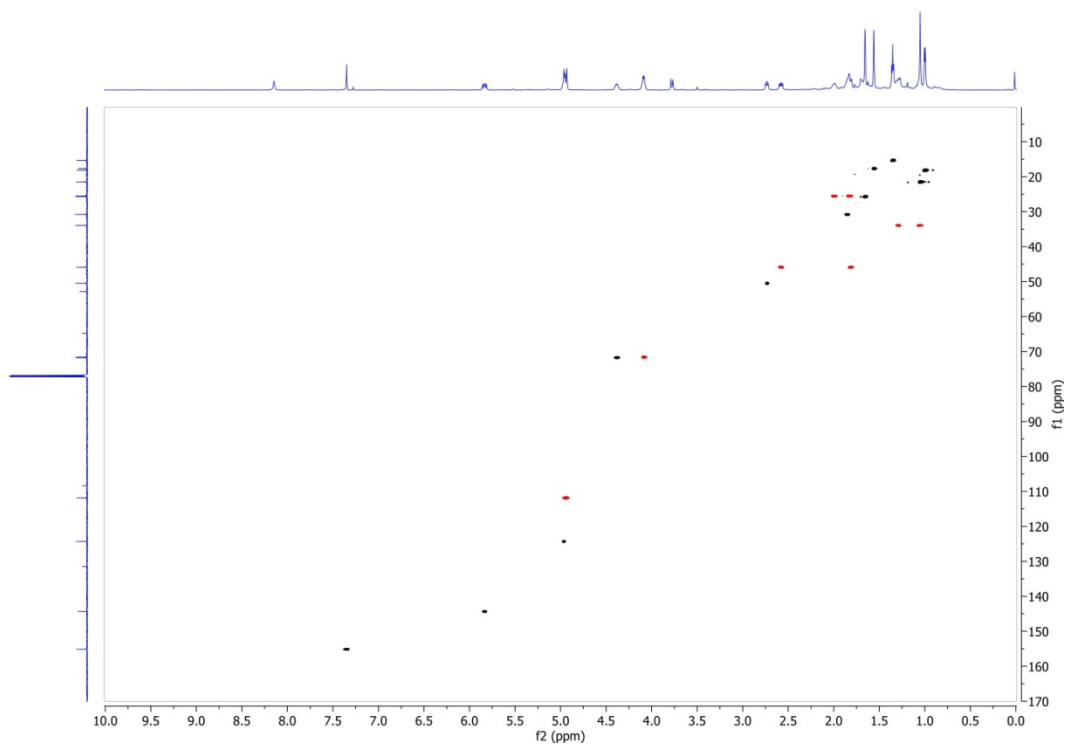

**Figure S12.** HMBC spectrum of dictyospiromide (**1**) in CDCl<sub>3</sub>.

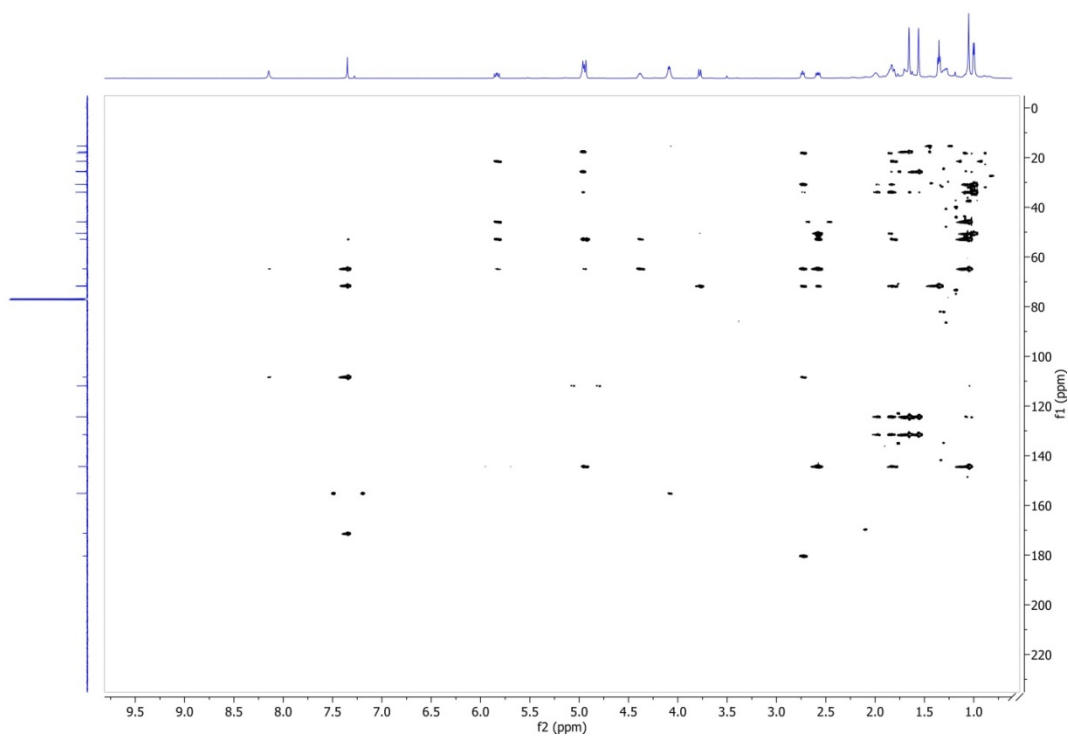

**Figure S13.** COSY spectrum of dictyospiromide (**1**) in CDCl<sub>3</sub>.

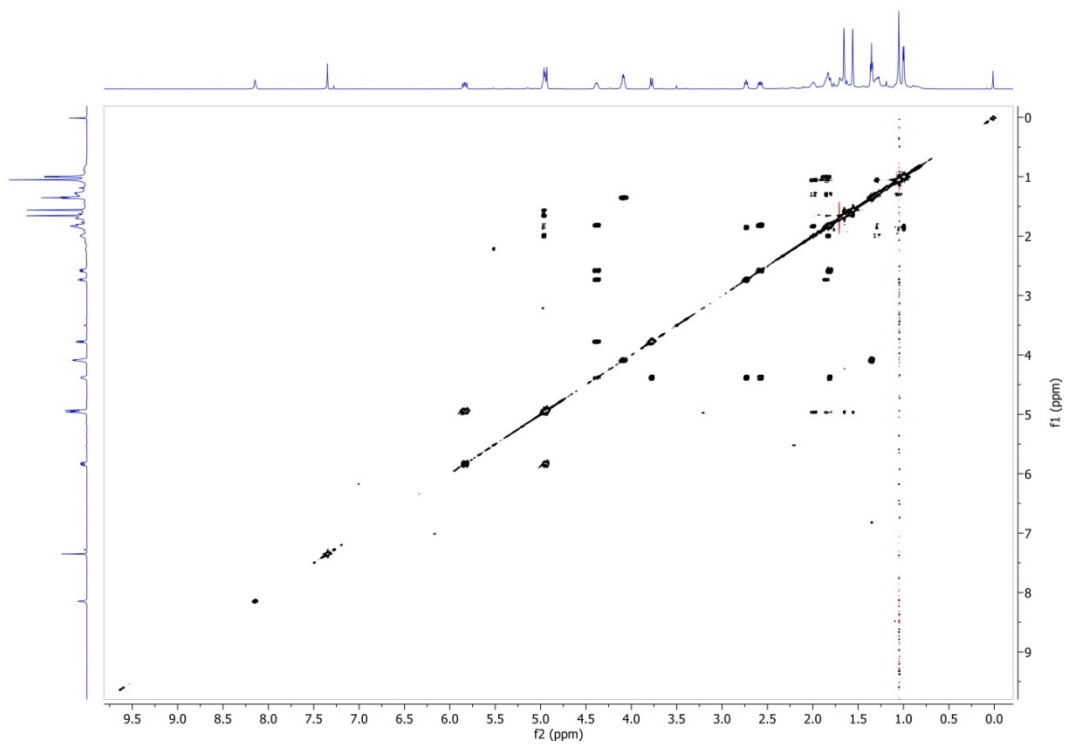



**Figure S14.** ROESY spectrum of dictyospiromide (**1**) in CDCl<sub>3</sub>.

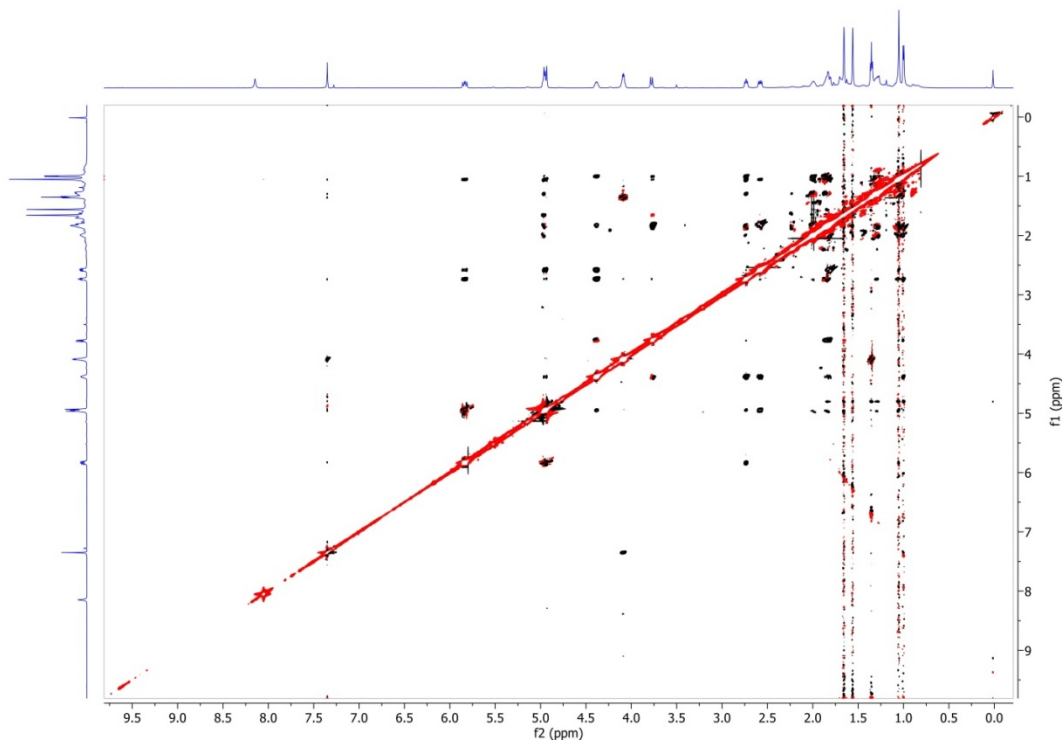

**Figure S15.** HRESIMS spectrum of dictyospiromide (**1**).

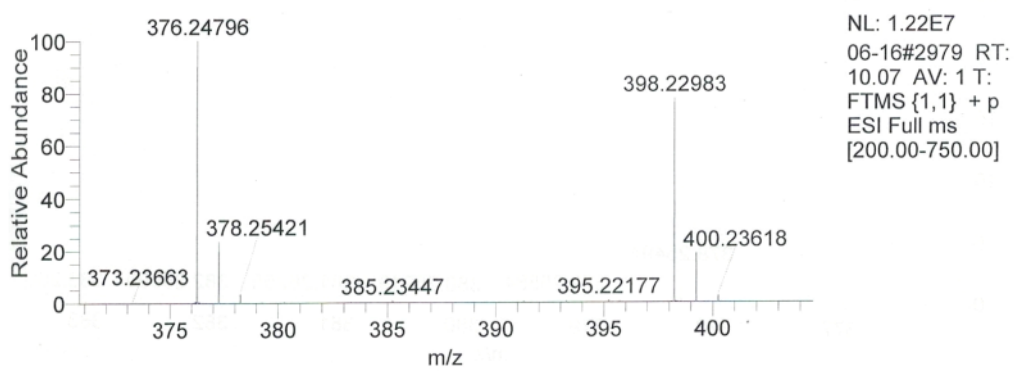

**Figure S16.** CD spectrum for  $\text{Rh}_2(\text{OCOCF}_3)_4$  complex of dictyospiromide (**1**).

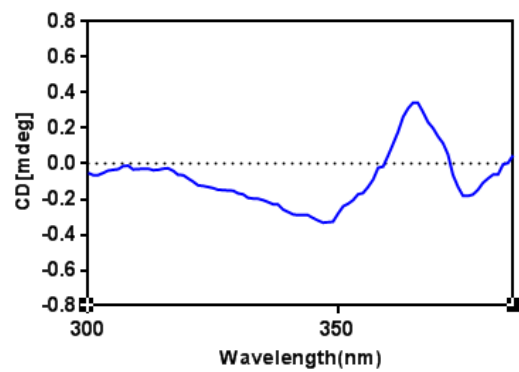

## Biological Characterization

Dictyospiromide (**1**) was evaluated for its cytoprotective effect against H<sub>2</sub>O<sub>2</sub>-induced oxidative damage in neuron-like PC12 cells by the MTT method. Compared with the control group, the cell survival rate of PC12 cells treated with H<sub>2</sub>O<sub>2</sub> was around 54%, and it was increased by **1** in a dose-dependent manner. The cytoprotective effect of 5  $\mu$ M **1** was comparable to that of the positive control *tert*-butylhydroquinone (TBHQ, 2  $\mu$ M). The cytoprotection of **1** was further evaluated in a lactate dehydrogenase (LDH) assay that uses release of this cytosolic enzyme as an index of cell injury. Compound **1** inhibited the H<sub>2</sub>O<sub>2</sub>-induced LDH production in PC12 cells in a dose-dependent manner. The inhibitory effect of **1** was observed even at a low concentration of 0.5  $\mu$ M. Thus, **1** is a potent cytoprotectant with antioxidant properties in PC12 neuronal cells.

Dictyospiromide (**1**) was also investigated for activation of the Nrf2 (nuclear erythroid 2-related factor 2)/ARE (antioxidant response element) signaling pathway, which regulates the expression of genes involved with cellular response to oxidative stress and is a key pathway associated with neuroprotection. First, the promotion effect of **1** on the nuclear translocation of Nrf2 was determined using an immunofluorescence assay. Both **1** and the positive control TBHQ significantly promoted the delivery and accumulation of Nrf2 in the nucleus as indicated by the strong red fluorescence observed in the nucleus, suggesting that **1** is a potent Nrf2 activator. Second, compound **1** was evaluated for its up-regulation effect on the expression of heme oxygenase-1 (HO-1), an antioxidant protein regulated by Nrf2, in PC12 cells based on a Western blot assay. This showed that **1** promoted HO-1 production in a dose-dependent manner, and the promotion effect of 2  $\mu$ M **1** was comparable to that of the positive control TBHQ. These findings confirmed the potent induction of Nrf2-ARE signaling by treatment with **1**. Nrf2 siRNA was applied to investigate whether the antioxidant effect of **1** in PC12 cells is dependent on the role of Nrf2. Cellular viability in the control siRNA (si Con) group was increased by **1**, while the cytoprotective activity of **1** was reversed by knockdown of Nrf2. This established that Nrf2 is a key mediator of the antioxidant effect of **1**. Furthermore, the role of HO-1 in the cytoprotective effect of **1** was investigated by using the HO-1 inhibitor zinc protoporphyrin (ZnPP). The result showed that the cytoprotective effect of **1** was partially suppressed when **1** and the maximum non-cytotoxic concentration (10  $\mu$ M) of ZnPP were applied together, implying that HO-1 contributes in part to the antioxidant effect of **1** in PC12 cells. Overall, dictyospiromide (**1**) exerted an antioxidant effect in PC12 cells that is mediated by activation of the Nrf2/ARE signaling pathway and enhancement of HO-1 expression.

## Anisotropic Data: Sample Preparation and Acquisition of $^{13}\text{C}$ Spectra

Residual Chemical Shift Anisotropy (RCSA) data were obtained using Eq. 1 shown below:

$$RCSA_i = (\delta_{A_1}^i - \delta_{A_1}^{TMS}) - (\delta_{I_0}^i - \delta_{I_0}^{TMS}) - \frac{[PBLG]_{A_1}}{[PBLG]_{I_1}} [(\delta_{I_1}^i - \delta_{I_1}^{TMS}) - (\delta_{I_0}^i - \delta_{I_0}^{TMS})]$$

**Eq. 1**

Parameters  $I_0$ ,  $I_1$ , and  $A_1$  were determined from three different  $^{13}\text{C}$  NMR experiments acquired in a 5 mm NMR tube on a Bruker Avance III 600 MHz spectrometer equipped with a 5 mm TXI CryoProbe™ at 25 °C.

The first  $^{13}\text{C}$  experiment was acquired in isotropic conditions with no poly- $\gamma$ -(benzyl-L-glutamate) (PBLG) added by just dissolving approximately 3 mg of **1** in 500  $\mu\text{L}$  of  $\text{CDCl}_3$  in a 5 mm tube. TMS - 4% (v/v), was added for RCSA referencing purposes. This experiment is referred to as  $I_0$ . A second  $^{13}\text{C}$  spectrum was acquired following addition of 27.1 mg of PBLG, which still corresponds to isotropic conditions where the amount of PBLG is below the critical concentration required to produce a pure anisotropic liquid crystalline solution. This experiment is referred to as  $I_1$ .

A final third  $^{13}\text{C}$  spectrum was acquired following addition of 33.5 mg of PBLG (60.6 mg total PBLG), which corresponds to the full anisotropic liquid crystalline medium, is referred to as  $A_1$ . Further details about the sample preparation can be found in the original research article.<sup>[1]</sup>

All  $^{13}\text{C}$  spectra were acquired using a spectral width of 36231.88 Hz, with 64K points acquired and a relaxation delay of 1 s. 4096 scans were acquired for  $I_0$  and  $I_1$  experiments, while 12228 scans were acquired for  $A_1$  to compensate for decreased signal-to-noise ratio due to line-broadening in anisotropic conditions.

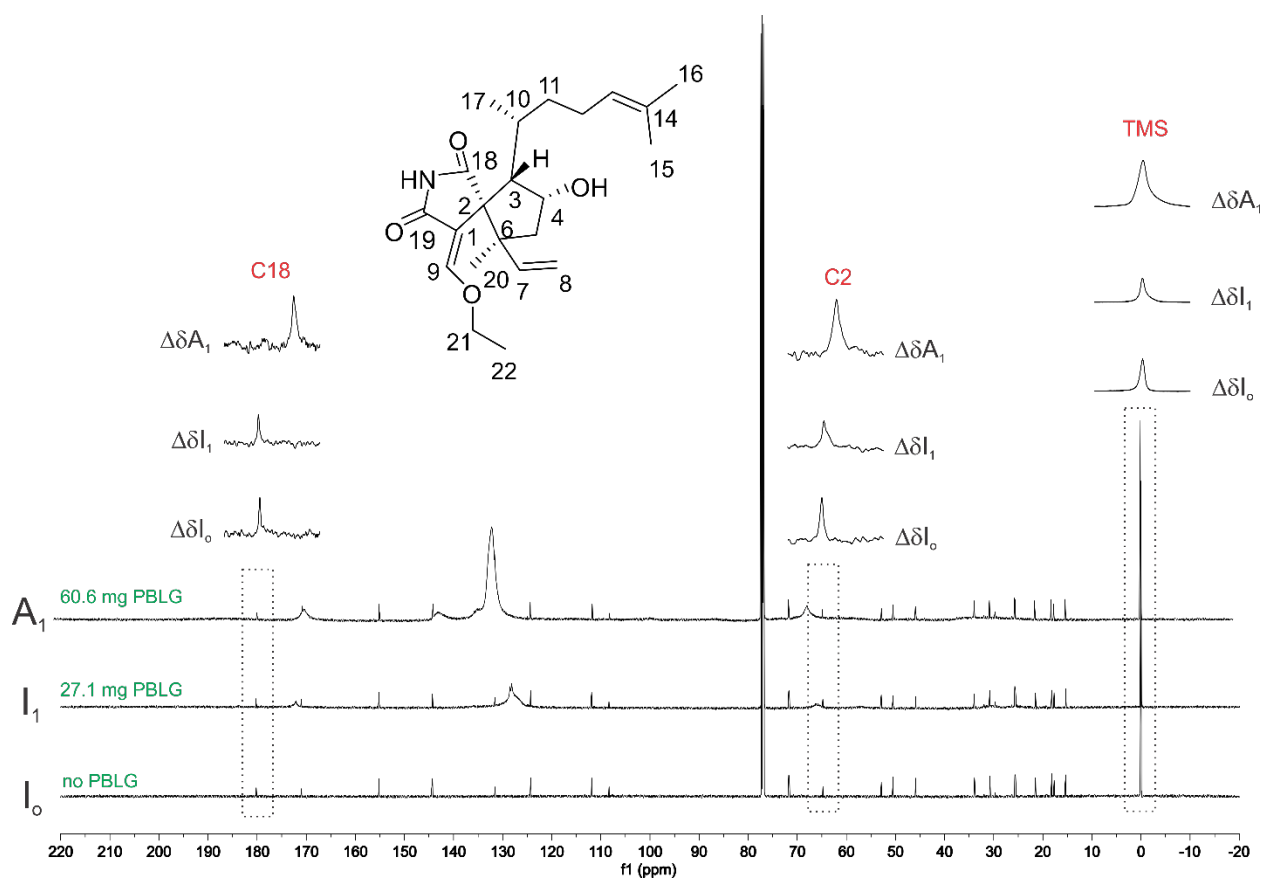

**Figure S17.**  $^{13}\text{C}$  spectra of samples  $I_0$ ,  $I_1$ , and  $A_1$  from which experimental RCSA values are obtained. Spectra are all referenced against TMS signal.

**Table S2.** Residual chemical shift anisotropy (RCSA) values derived from Eq. 1.

| Carbon atom | $I_0$ (Hz) | $I_1$ (27.1 mg PBLG) (Hz) | $A_1$ (60.6) mg PBLG) (Hz) | Experimental RCSA (Hz) |
|-------------|------------|---------------------------|----------------------------|------------------------|
| C18         | 27178.9    | 27180.3                   | 27147.5                    | -34.61                 |
| C19         | 25790.8    | 25790.8                   | 25747.5                    | -43.28                 |
| C9          | 23402.0    | 23404.9                   | 23381.0                    | -27.45                 |
| C7          | 21765.5    | 21766.1                   | 21729.7                    | -37.05                 |
| C8          | 16876.4    | 16874.5                   | 16838.5                    | -33.69                 |
| C1          | 16341.5    | 16341.5                   | 16312.0                    | -29.50                 |
| C2          | 9772.8     | 9771.8                    | 9766.2                     | -4.32                  |
| C6          | 7977.7     | 7976.1                    | 7956.1                     | -18.04                 |
| C3          | 7616.8     | 7615.5                    | 7596.7                     | -17.13                 |
| C5          | 6920.9     | 6920.9                    | 6908.0                     | -12.91                 |
| C11         | 5115.9     | 5115.9                    | 5107.8                     | -8.07                  |
| C10         | 4645.8     | 4645.8                    | 4637.3                     | -8.50                  |
| C20         | 3241.7     | 3241.7                    | 3252.1                     | 10.38                  |
| C17         | 2740.0     | 2740.0                    | 2749.8                     | 9.79                   |

## Procedure for DFT Geometry Optimization and Chemical Shift Calculation

Conformational search was performed using OPLS3e force field in Maestro.<sup>[2]</sup> Structures having relative energy under 40 kJ/mol were saved and submitted to further DFT calculations. DFT calculation was performed using Gaussian'16 software package.<sup>[3]</sup> For chemical shift calculation, geometry optimization was calculated using M06-2X/6-31+G(d,p) level of theory with chloroform as solvent using SMD model. Frequency calculation was carried out to ensure no imaginary frequency. Energy was calculated using M06-2X/6-311+G(d,p) level of theory with chloroform as solvent using SMD model, and Gibbs free energy was calculated for 298 K. NMR chemical shielding was calculated using mPW1PW91/6-311+G(2d,p) level of theory with chloroform as solvent using PCM model, and the chemical shifts were then converted from the shielding with scaling factors: <sup>1</sup>H slope = -1.0719, <sup>1</sup>H intercept = 31.8733; <sup>13</sup>C slope = -1.0420, <sup>13</sup>C intercept = 186.3567. For RCSA tensor calculation, geometry optimization was obtained using B3LYP/6-31+G(d,p) level of theory without employing solvent model. The chemical shielding tensors and Gibbs free energy were calculated using the same level of theory as the chemical shift calculation mentioned above.

### Summary of DFT Chemical Shift RMSD and MAE Values Obtained for 1a, 1b, 1c and 1d and DP4+ Probabilities for the Isomers

|                                         | 1a: 1E2S | 1b: 1Z2S | 1c: 1E2R | 1d: 1Z2R |
|-----------------------------------------|----------|----------|----------|----------|
| <sup>1</sup> H RMSD, ppm                | 0.16     | 0.16     | 0.16     | 0.33     |
| <sup>1</sup> H MAE, ppm                 | 0.12     | 0.13     | 0.12     | 0.21     |
| <sup>13</sup> C RMSD, ppm               | 2.29     | 2.44     | 1.91     | 2.65     |
| <sup>13</sup> C MAE, ppm                | 1.74     | 1.74     | 1.34     | 1.93     |
| DP4+ ( <sup>1</sup> H)                  | 43.03%   | 4.01%    | 52.96%   | 0%       |
| DP4+ ( <sup>13</sup> C)                 | 0.06%    | 0.06%    | 99.88%   | 0%       |
| DP4+ ( <sup>1</sup> H+ <sup>13</sup> C) | 0.05%    | 0%       | 99.95%   | 0%       |

### Superposition of Low Energy Conformers

As described in the main manuscript, superposition of the lowest energy conformers with > 2% Boltzmann population for each isomer led to the realization that the core of the structure was very rigid from the conformational point of view, showing an excellent alignment between all conformers when the flexible side chains were not considered.

Figures S18-S21 illustrate the superposition of the low energy conformers for **1a**, **1b**, **1c** and **1d**, respectively.

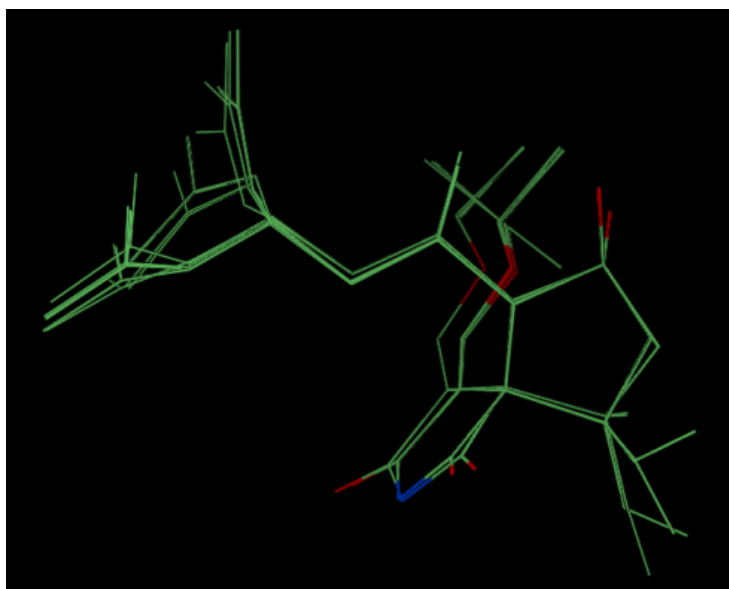

**Figure S18.** Superposition of 20 conformers (above 2% Boltzmann population) **1a** (1E2R).

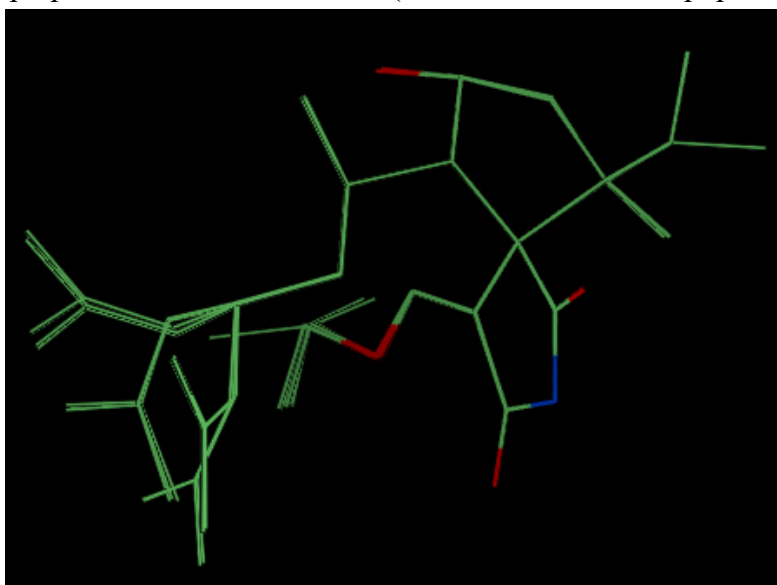

**Figure S19.** Superposition of 14 conformers (above 2% Boltzmann population) **1b** (1Z2R).

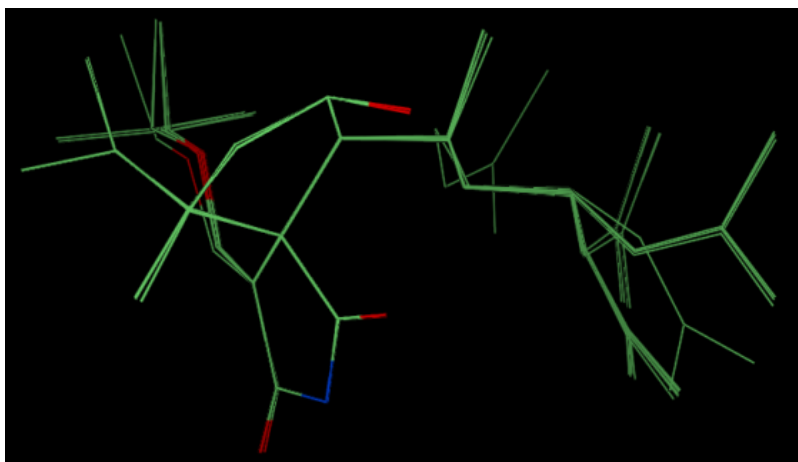

**Figure S20.** Superposition of 18 conformers (above 2% Boltzmann population) **1c** (1E2S).

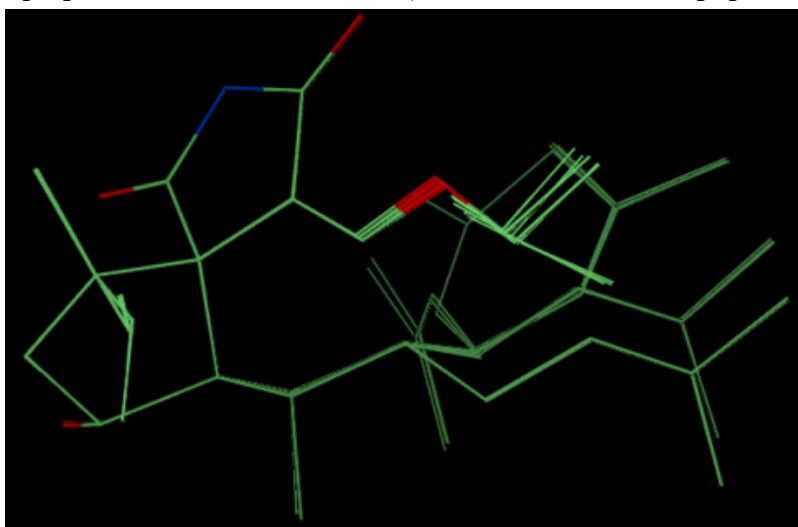

**Figure 21.** Superposition of 19 conformers (above 2% Boltzmann population) **1d** (1Z2S).

The completed lists of conformers obtained from DFT calculations for each isomer **1a**, **1b**, **1c** and **1d** are listed below in Table S3-S6, respectively.

**Table S3.** List of conformers obtained from DFT calculations for **1a**.

| 1E2S (1a)   |                             |                        |
|-------------|-----------------------------|------------------------|
| Conformer # | Gibbs Free Energy (Hartree) | Boltzmann Distribution |
| 11          | -1213.23606692              | 0.078                  |
| 3           | -1213.23570489              | 0.053                  |
| 30          | -1213.23568788              | 0.052                  |
| 32          | -1213.23567213              | 0.051                  |
| 43          | -1213.23567048              | 0.051                  |
| 22          | -1213.23559233              | 0.047                  |
| 9           | -1213.23557204              | 0.046                  |
| 19          | -1213.23524718              | 0.033                  |
| 35          | -1213.23524649              | 0.033                  |



|    |                |       |
|----|----------------|-------|
| 13 | -1213.23517954 | 0.03  |
| 20 | -1213.23514515 | 0.029 |
| 31 | -1213.23513285 | 0.029 |
| 1  | -1213.23511591 | 0.028 |
| 5  | -1213.23506744 | 0.027 |
| 6  | -1213.23501603 | 0.026 |
| 2  | -1213.23491939 | 0.023 |
| 12 | -1213.23491166 | 0.023 |
| 53 | -1213.23489334 | 0.022 |
| 37 | -1213.23488269 | 0.022 |
| 24 | -1213.23482089 | 0.021 |
| 57 | -1213.23479574 | 0.02  |
| 23 | -1213.23472956 | 0.019 |
| 47 | -1213.23468543 | 0.018 |
| 15 | -1213.23466221 | 0.018 |
| 45 | -1213.23464822 | 0.017 |
| 16 | -1213.23461115 | 0.017 |
| 48 | -1213.23452647 | 0.015 |
| 49 | -1213.23448436 | 0.015 |
| 26 | -1213.23447078 | 0.014 |
| 14 | -1213.23433349 | 0.012 |
| 33 | -1213.23430447 | 0.012 |
| 18 | -1213.23422217 | 0.011 |
| 44 | -1213.23388295 | 0.008 |
| 27 | -1213.23373638 | 0.007 |
| 39 | -1213.23361157 | 0.006 |
| 29 | -1213.23359637 | 0.006 |
| 25 | -1213.23357825 | 0.006 |
| 58 | -1213.23357749 | 0.006 |
| 40 | -1213.23350749 | 0.005 |
| 42 | -1213.23344679 | 0.005 |
| 38 | -1213.23344285 | 0.005 |
| 50 | -1213.23342947 | 0.005 |
| 21 | -1213.23323702 | 0.004 |
| 7  | -1213.23321142 | 0.004 |
| 66 | -1213.23319078 | 0.004 |
| 28 | -1213.23311382 | 0.003 |
| 54 | -1213.23274548 | 0.002 |
| 17 | -1213.23273108 | 0.002 |
| 52 | -1213.23270535 | 0.002 |
| 56 | -1213.23254734 | 0.002 |
| 41 | -1213.23251851 | 0.002 |
| 34 | -1213.23231829 | 0.001 |
| 51 | -1213.23225051 | 0.001 |
| 46 | -1213.23219494 | 0.001 |

**Table S4.** List of conformers obtained from DFT calculations for **1b**.

| <b>1Z2S (1b)</b> |                                |                           |
|------------------|--------------------------------|---------------------------|
| Conformer #      | Gibbs Free Energy<br>(Hartree) | Boltzmann<br>Distribution |
| 2                | -1213.23208299                 | 0.133                     |
| 3                | -1213.23144457                 | 0.068                     |
| 6                | -1213.23137958                 | 0.063                     |
| 18               | -1213.23137353                 | 0.063                     |
| 1                | -1213.23136323                 | 0.062                     |
| 9                | -1213.23115865                 | 0.05                      |
| 21               | -1213.23072586                 | 0.032                     |
| 19               | -1213.23071752                 | 0.031                     |
| 26               | -1213.23065365                 | 0.029                     |
| 23               | -1213.23063234                 | 0.029                     |
| 4                | -1213.23057047                 | 0.027                     |
| 30               | -1213.23056989                 | 0.027                     |
| 7                | -1213.23051914                 | 0.025                     |
| 8                | -1213.23046174                 | 0.024                     |
| 68               | -1213.23023828                 | 0.019                     |
| 50               | -1213.23022390                 | 0.019                     |
| 20               | -1213.23016728                 | 0.018                     |
| 12               | -1213.23015172                 | 0.017                     |
| 5                | -1213.23010998                 | 0.016                     |
| 29               | -1213.22991841                 | 0.013                     |
| 15               | -1213.22979725                 | 0.012                     |
| 35               | -1213.22976812                 | 0.011                     |
| 56               | -1213.22973648                 | 0.011                     |
| 16               | -1213.22969518                 | 0.011                     |
| 76               | -1213.22969326                 | 0.011                     |
| 77               | -1213.22968658                 | 0.011                     |
| 67               | -1213.22967522                 | 0.01                      |
| 41               | -1213.22964411                 | 0.01                      |
| 45               | -1213.22961102                 | 0.01                      |
| 51               | -1213.22959465                 | 0.01                      |
| 24               | -1213.22952900                 | 0.009                     |
| 39               | -1213.22945522                 | 0.008                     |
| 25               | -1213.22944639                 | 0.008                     |
| 36               | -1213.22939055                 | 0.008                     |

|    |                |       |
|----|----------------|-------|
| 55 | -1213.22934187 | 0.007 |
| 28 | -1213.22932510 | 0.007 |
| 88 | -1213.22928285 | 0.007 |
| 32 | -1213.22924511 | 0.007 |
| 71 | -1213.22918380 | 0.006 |
| 37 | -1213.22913962 | 0.006 |
| 65 | -1213.22913083 | 0.006 |
| 47 | -1213.22911680 | 0.006 |
| 34 | -1213.22908539 | 0.006 |
| 46 | -1213.22904590 | 0.005 |
| 81 | -1213.22897957 | 0.005 |
| 22 | -1213.22889059 | 0.005 |
| 53 | -1213.22888757 | 0.005 |
| 49 | -1213.22880052 | 0.004 |
| 44 | -1213.22879895 | 0.004 |
| 52 | -1213.22849731 | 0.003 |
| 42 | -1213.22833287 | 0.003 |
| 43 | -1213.22816362 | 0.002 |
| 33 | -1213.22812894 | 0.002 |

**Table S5.** List of conformers obtained from DFT calculations for **1c**.

| <b>1E2R (1c)</b> |                                |                           |
|------------------|--------------------------------|---------------------------|
| Conformer #      | Gibbs Free Energy<br>(Hartree) | Boltzmann<br>Distribution |
| 14               | -1213.23921448                 | 0.11                      |
| 182              | -1213.23909228                 | 0.096                     |
| 27               | -1213.23902993                 | 0.09                      |
| 342              | -1213.23863584                 | 0.059                     |
| 34               | -1213.23857661                 | 0.056                     |
| 16               | -1213.23844416                 | 0.049                     |
| 22               | -1213.23832810                 | 0.043                     |
| 323              | -1213.23832135                 | 0.043                     |
| 15               | -1213.23831382                 | 0.042                     |
| 30               | -1213.23827870                 | 0.041                     |
| 341              | -1213.23826876                 | 0.04                      |
| 18               | -1213.23826807                 | 0.04                      |
| 6                | -1213.23815863                 | 0.036                     |
| 39               | -1213.23796964                 | 0.029                     |
| 47               | -1213.23781424                 | 0.025                     |
| 42               | -1213.23775648                 | 0.023                     |
| 56               | -1213.23770519                 | 0.022                     |
| 53               | -1213.23760449                 | 0.02                      |

|     |                |       |
|-----|----------------|-------|
| 62  | -1213.23753238 | 0.018 |
| 11  | -1213.23751979 | 0.018 |
| 8   | -1213.23736639 | 0.015 |
| 59  | -1213.23719004 | 0.013 |
| 105 | -1213.23716989 | 0.013 |
| 25  | -1213.23695056 | 0.01  |
| 70  | -1213.23645255 | 0.006 |
| 124 | -1213.23603205 | 0.004 |
| 153 | -1213.23601315 | 0.004 |
| 110 | -1213.23593679 | 0.003 |
| 79  | -1213.23592023 | 0.003 |
| 143 | -1213.23588111 | 0.003 |
| 128 | -1213.23586397 | 0.003 |
| 100 | -1213.23569806 | 0.003 |
| 209 | -1213.23566307 | 0.003 |
| 116 | -1213.23547210 | 0.002 |
| 221 | -1213.23545519 | 0.002 |
| 123 | -1213.23541083 | 0.002 |
| 134 | -1213.23540726 | 0.002 |
| 144 | -1213.23539548 | 0.002 |
| 180 | -1213.23539159 | 0.002 |
| 129 | -1213.23535576 | 0.002 |
| 84  | -1213.23523471 | 0.002 |

**Table S6.** List of conformers obtained from DFT calculations for **1d**.

| <b>1Z2R (1d)</b> |                                |                           |
|------------------|--------------------------------|---------------------------|
| Conformer #      | Gibbs Free Energy<br>(Hartree) | Boltzmann<br>Distribution |
| 9                | -1213.23457416                 | 0.107                     |
| 16               | -1213.23448104                 | 0.097                     |
| 266              | -1213.23418726                 | 0.071                     |
| 290              | -1213.23394843                 | 0.055                     |
| 1                | -1213.23392734                 | 0.054                     |
| 27               | -1213.23389782                 | 0.052                     |
| 21               | -1213.23387882                 | 0.051                     |
| 39               | -1213.23375459                 | 0.045                     |
| 11               | -1213.23372922                 | 0.044                     |
| 17               | -1213.23371646                 | 0.043                     |
| 267              | -1213.23364976                 | 0.04                      |
| 12               | -1213.23360681                 | 0.038                     |
| 30               | -1213.23325485                 | 0.026                     |

|     |                |       |
|-----|----------------|-------|
| 31  | -1213.23325101 | 0.026 |
| 19  | -1213.23324981 | 0.026 |
| 33  | -1213.23323102 | 0.026 |
| 41  | -1213.23319065 | 0.025 |
| 301 | -1213.23309680 | 0.022 |
| 7   | -1213.23297914 | 0.02  |
| 35  | -1213.23295751 | 0.019 |
| 32  | -1213.23295637 | 0.019 |
| 44  | -1213.23286009 | 0.017 |
| 3   | -1213.23277050 | 0.016 |
| 25  | -1213.23225012 | 0.009 |
| 20  | -1213.23217999 | 0.008 |
| 42  | -1213.23174270 | 0.005 |
| 147 | -1213.23159239 | 0.005 |
| 146 | -1213.23133980 | 0.003 |
| 62  | -1213.23124275 | 0.003 |
| 46  | -1213.23123340 | 0.003 |
| 54  | -1213.23117881 | 0.003 |
| 111 | -1213.23115574 | 0.003 |
| 59  | -1213.23112168 | 0.003 |
| 110 | -1213.23104511 | 0.003 |
| 64  | -1213.23100331 | 0.002 |
| 115 | -1213.23098351 | 0.002 |
| 65  | -1213.23089431 | 0.002 |
| 53  | -1213.23088367 | 0.002 |
| 61  | -1213.23086481 | 0.002 |

### Standard Q factors and CSA weighted Q factors

Q factors were obtained by using the single tensor approach with RCSA fitting against the lowest energy conformer of each isomer.

However, it is known<sup>[4]</sup> that  $sp^2$  carbons exhibit much larger RCSA than the  $sp^3$  carbons. Since most of the carbon atoms used in the RCSA analysis are  $sp^3$ , but there are also a few  $sp^2$  carbons, we decided to calculate a CSA-weighted Q factor,  $Q_{(CSA)}$ <sup>[4]</sup>. This was done in order to ensure that a few  $sp^2$  carbons do not contribute disproportionately to the conventional RCSA analysis.  $Q_{(CSA)}$  values are compensated for the difference in CSA between  $sp^2$  and  $sp^3$  carbons as illustrated by Eq.2 below.

$$Q_{(CSA)} = \sqrt{\frac{\sum((\Delta RCSA_{i,ax}^{exp} - \Delta RCSA_i^{theo})/CSA_{i,ax})^2}{\sum(\Delta RCSA_{i,ax}^{exp}/CSA_{i,ax})^2}} \quad \text{Eq. 2}$$

A comparison of standard Q factors and  $Q_{(CSA)}$  factors is summarized in Table S6.

**Table S7.** Measured Q and  $Q_{(CSA)}$  factors using single tensor fitting.

|        | <b>1a:</b><br><b>1E2S</b> | <b>1b:</b><br><b>1Z2S</b> | <b>1c:</b><br><b>1E2R</b> | <b>1d:</b><br><b>1Z2R</b> |
|--------|---------------------------|---------------------------|---------------------------|---------------------------|
| Q      | 0.196                     | 0.138                     | 0.097                     | 0.234                     |
| Q(csa) | 0.344                     | 0.286                     | 0.195                     | 0.430                     |

As evident from these results,  $Q_{(CSA)}$  were also strongly indicating **1c** as the correct isomer with a  $Q_{(CSA)}$  ratio between the lowest Q and the second best Q of 1.467, just slightly better than the corresponding ratio for standard Q, which is 1.423.

## REFERENCES

1. Y. Liu, R. D. Cohen, K. R. Gustafson, G. E. Martin and R. T. Williamson, *Chem. Comm.* **2018**, 54, 4254.
2. Schrödinger Release 2018-3: Maestro, Schrödinger, LLC, New York, NY, **2019**.
3. Gaussian 16, Revision B.01, M. J. Frisch, G. W. Trucks, H. B. Schlegel, G. E. Scuseria, M. A. Robb, J. R. Cheeseman, G. Scalmani, V. Barone, G. A. Petersson, H. Nakatsuji, X. Li, M. Caricato, A. V. Marenich, J. Bloino, B. G. Janesko, R. Gomperts, B. Mennucci, H. P. Hratchian, J. V. Ortiz, A. F. Izmaylov, J. L. Sonnenberg, D. Williams-Young, F. Ding, F. Lipparini, F. Egidi, J. Goings, B. Peng, A. Petrone, T. Henderson, D. Ranasinghe, V. G. Zakrzewski, J. Gao, N. Rega, G. Zheng, W. Liang, M. Hada, M. Ehara, K. Toyota, R. Fukuda, J. Hasegawa, M. Ishida, T. Nakajima, Y. Honda, O. Kitao, H. Nakai, T. Vreven, K. Throssell, J. A. Montgomery, Jr., J. E. Peralta, F. Ogliaro, M. J. Bearpark, J. J. Heyd, E. N. Brothers, K. N. Kudin, V. N. Staroverov, T. A. Keith, R. Kobayashi, J. Normand, K. Raghavachari, A. P. Rendell, J. C. Burant, S. S. Iyengar, J. Tomasi, M. Cossi, J. M. Millam, M. Klene, C. Adamo, R. Cammi, J. W. Ochterski, R. L. Martin, K. Morokuma, O. Farkas, J. B. Foresman, and D. J. Fox, Gaussian, Inc., Wallingford CT, **2016**.
4. N. Nath, M. Schmidt, R. R. Gil, R. T. Williamson, G. E. Martin, A. Navarro-Vazquez, C. Griesinger and Y. Liu, *J. Am. Chem. Soc.* **2016**, 138, 9548.

## Cartesian Coordinates of Conformers (>2% population) of 1a

Conf 11

|   |           |           |          |
|---|-----------|-----------|----------|
| C | 0.918531  | 2.793860  | 2.086590 |
| C | 0.206318  | 2.322360  | 3.351590 |
| C | 1.012190  | 2.719620  | 4.537920 |
| N | 2.068610  | 3.483020  | 4.048080 |
| C | 2.013330  | 3.706320  | 2.678240 |
| C | 1.619480  | 1.586790  | 1.261820 |
| C | 0.081660  | 3.527840  | 0.986034 |
| C | -0.941591 | 1.677550  | 3.628740 |
| O | 0.823752  | 2.476180  | 5.720410 |
| O | 2.732300  | 4.482990  | 2.081750 |
| H | 2.721300  | 3.964280  | 4.654530 |
| H | -1.179400 | 1.498320  | 4.676620 |
| O | -1.837100 | 1.211990  | 2.731630 |
| C | -3.028980 | 0.601816  | 3.298770 |
| H | -2.712650 | -0.202973 | 3.972440 |
| C | -3.885170 | 0.070082  | 2.166730 |
| H | -3.560520 | 1.363330  | 3.880770 |
| H | -4.779250 | -0.404573 | 2.583150 |
| H | -3.342430 | -0.675926 | 1.579180 |

|   |           |           |           |
|---|-----------|-----------|-----------|
| H | -4.207520 | 0.874150  | 1.498650  |
| C | 2.756860  | 2.110030  | 0.396977  |
| C | 2.081050  | 0.423989  | 2.149800  |
| C | 0.460491  | 1.156960  | 0.325319  |
| C | -0.373298 | 2.409670  | -0.022870 |
| H | 0.824643  | 4.137430  | 0.456332  |
| C | -1.040430 | 4.507510  | 1.416240  |
| H | -0.171347 | 2.747870  | -1.042590 |
| O | -1.769250 | 2.121880  | -0.028022 |
| H | -0.187415 | 0.452775  | 0.857615  |
| H | 0.835125  | 0.640506  | -0.563463 |
| H | 2.463740  | -0.390887 | 1.527630  |
| H | 2.879390  | 0.720342  | 2.838280  |
| H | 1.253510  | 0.026479  | 2.740700  |
| C | 3.998230  | 1.622350  | 0.318775  |
| H | -1.996420 | 1.785270  | 0.851765  |
| C | -0.558945 | 5.544850  | 2.454450  |
| C | -1.599990 | 5.213340  | 0.164756  |
| H | -1.857010 | 3.933060  | 1.870190  |
| H | -2.443710 | 5.860800  | 0.418989  |
| H | -1.956940 | 4.490590  | -0.570956 |
| H | -0.828608 | 5.840140  | -0.301803 |
| H | -0.123021 | 5.031100  | 3.318350  |
| H | 0.246592  | 6.147720  | 2.015540  |
| C | -1.649170 | 6.495320  | 3.001470  |
| C | -2.721100 | 5.789090  | 3.791230  |
| H | -1.144870 | 7.213030  | 3.665830  |
| H | -2.077300 | 7.091910  | 2.191630  |
| C | -4.057790 | 5.880110  | 3.675260  |
| C | -4.969850 | 5.103610  | 4.598120  |
| C | -4.783240 | 6.743160  | 2.670530  |
| H | -5.462300 | 6.135720  | 2.057380  |
| H | -5.408420 | 7.486440  | 3.183510  |
| H | -4.112810 | 7.280870  | 1.997810  |
| H | -5.622020 | 5.779190  | 5.168120  |
| H | -5.634770 | 4.438640  | 4.029520  |
| H | -4.406090 | 4.497130  | 5.313480  |
| H | -2.337130 | 5.132690  | 4.575610  |
| H | 4.716700  | 2.058050  | -0.368937 |
| H | 4.352960  | 0.795527  | 0.925814  |
| H | 2.507680  | 2.948110  | -0.249625 |

Conf 3

|   |           |          |          |
|---|-----------|----------|----------|
| C | 0.951519  | 2.874900 | 1.851100 |
| C | 0.399673  | 2.528100 | 3.228740 |
| C | 1.300900  | 3.071930 | 4.275950 |
| N | 2.261930  | 3.821490 | 3.600120 |
| C | 2.067220  | 3.878670 | 2.230860 |
| C | 1.623130  | 1.589020 | 1.063230 |
| C | -0.002454 | 3.554020 | 0.789600 |
| C | -0.704230 | 1.897970 | 3.669030 |
| O | 1.245110  | 2.949510 | 5.490070 |
| O | 2.684830  | 4.609340 | 1.479030 |
| H | 2.963980  | 4.372580 | 4.077990 |
| H | -0.864877 | 1.817040 | 4.743090 |
| O | -1.638610 | 1.331660 | 2.878600 |

|   |           |           |           |
|---|-----------|-----------|-----------|
| C | -2.857280 | 0.886412  | 3.532060  |
| H | -2.577350 | 0.275943  | 4.398720  |
| C | -3.672460 | 0.091953  | 2.531140  |
| H | -3.398620 | 1.772710  | 3.881280  |
| H | -4.602760 | -0.239519 | 3.003240  |
| H | -3.124860 | -0.791712 | 2.191030  |
| H | -3.927080 | 0.700607  | 1.658890  |
| C | 3.139230  | 1.685740  | 0.994750  |
| C | 1.199430  | 0.243959  | 1.681050  |
| C | 1.037860  | 1.723790  | -0.372869 |
| C | -0.293973 | 2.472280  | -0.272355 |
| H | 0.652046  | 4.269930  | 0.272470  |
| C | -1.223030 | 4.360610  | 1.302530  |
| H | -0.537702 | 2.935140  | -1.233320 |
| O | -1.407450 | 1.625450  | 0.015473  |
| H | 0.917776  | 0.747266  | -0.851149 |
| H | 1.718730  | 2.315820  | -0.996315 |
| H | 1.632190  | -0.567462 | 1.088190  |
| H | 1.545660  | 0.132246  | 2.711920  |
| H | 0.118022  | 0.113393  | 1.670350  |
| C | 4.032160  | 0.847253  | 1.530920  |
| H | -1.479280 | 1.484070  | 0.971623  |
| C | -0.779882 | 5.566400  | 2.161930  |
| C | -2.084980 | 4.824250  | 0.112344  |
| H | -1.845990 | 3.709850  | 1.926650  |
| H | -2.947170 | 5.404180  | 0.453031  |
| H | -2.468940 | 3.973140  | -0.454790 |
| H | -1.505220 | 5.461980  | -0.567556 |
| H | -0.095483 | 5.230590  | 2.948990  |
| H | -0.202615 | 6.256040  | 1.531200  |
| C | -1.914580 | 6.358270  | 2.850940  |
| C | -2.652680 | 5.570840  | 3.903090  |
| H | -1.449240 | 7.228950  | 3.336850  |
| H | -2.600980 | 6.768420  | 2.105320  |
| C | -3.978350 | 5.409540  | 4.064060  |
| C | -4.525810 | 4.614940  | 5.228480  |
| C | -5.038360 | 5.996730  | 3.162660  |
| H | -4.628650 | 6.540290  | 2.309540  |
| H | -5.698220 | 5.208520  | 2.776120  |
| H | -5.679070 | 6.690040  | 3.724160  |
| H | -5.170830 | 5.239110  | 5.861650  |
| H | -5.151650 | 3.780600  | 4.881390  |
| H | -3.728060 | 4.209850  | 5.858310  |
| H | -2.003740 | 5.099060  | 4.644280  |
| H | 5.096000  | 1.015760  | 1.391420  |
| H | 3.755170  | -0.023573 | 2.116800  |
| H | 3.514730  | 2.532120  | 0.423991  |

Conf 30

|   |           |          |          |
|---|-----------|----------|----------|
| C | 0.770960  | 2.672740 | 2.105250 |
| C | -0.116381 | 2.027410 | 3.169480 |
| C | 0.354194  | 2.453560 | 4.516550 |
| N | 1.360500  | 3.388850 | 4.294630 |
| C | 1.568020  | 3.686070 | 2.954600 |
| C | 1.785410  | 1.624240 | 1.399700 |
| C | 0.095376  | 3.345180 | 0.864515 |



|         |           |           |           |
|---------|-----------|-----------|-----------|
| C       | -1.198070 | 1.226240  | 3.181770  |
| O       | -0.037065 | 2.106950  | 5.620720  |
| O       | 2.286250  | 4.584300  | 2.560600  |
| H       | 1.783220  | 3.923100  | 5.043900  |
| H       | -1.609110 | 0.956156  | 4.153880  |
| O       | -1.836790 | 0.711005  | 2.109340  |
| C       | -2.997300 | -0.111881 | 2.409820  |
| H       | -2.672380 | -0.938279 | 3.052440  |
| C       | -3.579120 | -0.620521 | 1.106000  |
| H       | -3.720490 | 0.500994  | 2.960360  |
| H       | -4.446140 | -1.253250 | 1.320300  |
| H       | -2.847160 | -1.216750 | 0.553767  |
| H       | -3.909610 | 0.204704  | 0.468335  |
| C       | 3.018900  | 2.329720  | 0.849668  |
| C       | 2.290850  | 0.522877  | 2.352300  |
| C       | 0.883973  | 1.061020  | 0.287874  |
| C       | -0.003552 | 2.214620  | -0.227017 |
| H       | 0.861130  | 4.045170  | 0.507663  |
| C       | -1.202040 | 4.168630  | 1.060110  |
| H       | 0.368657  | 2.608350  | -1.175750 |
| O       | -1.322140 | 1.769420  | -0.534782 |
| H       | 0.232713  | 0.292604  | 0.715636  |
| H       | 1.457380  | 0.575432  | -0.506509 |
| H       | 2.917740  | -0.180611 | 1.795120  |
| H       | 2.902640  | 0.935152  | 3.162560  |
| H       | 1.464430  | -0.036603 | 2.798930  |
| C       | 3.394740  | 2.440030  | -0.427391 |
| H       | -1.685360 | 1.365950  | 0.267555  |
| C       | -1.094950 | 5.191190  | 2.212590  |
| C       | -1.559740 | 4.866960  | -0.267351 |
| H       | -2.020280 | 3.478040  | 1.305830  |
| H       | -2.517030 | 5.391370  | -0.196899 |
| H       | -1.644490 | 4.146000  | -1.082530 |
| H       | -0.793172 | 5.607370  | -0.530511 |
| H       | -0.820654 | 4.678130  | 3.140010  |
| H       | -0.283376 | 5.899790  | 1.999180  |
| C       | -2.393820 | 5.974290  | 2.505680  |
| C       | -2.242100 | 6.896060  | 3.687800  |
| H       | -2.664290 | 6.576860  | 1.628980  |
| H       | -3.215870 | 5.265440  | 2.657250  |
| C       | -2.884030 | 6.865240  | 4.869000  |
| C       | -2.578650 | 7.884480  | 5.942920  |
| C       | -3.943030 | 5.859040  | 5.253010  |
| H       | -3.640980 | 5.308180  | 6.153710  |
| H       | -4.885580 | 6.366360  | 5.499250  |
| H       | -4.151290 | 5.129390  | 4.468080  |
| H       | -3.477450 | 8.456380  | 6.211080  |
| H       | -2.234070 | 7.394640  | 6.863810  |
| H       | -1.807750 | 8.592650  | 5.625420  |
| H       | -1.495190 | 7.680560  | 3.550680  |
| H       | 4.327830  | 2.932260  | -0.684763 |
| H       | 2.806020  | 2.063690  | -1.258590 |
| H       | 3.680680  | 2.746640  | 1.605520  |
| Conf 32 |           |           |           |
| C       | 0.706019  | 2.634220  | 2.107080  |

|   |           |           |           |
|---|-----------|-----------|-----------|
| C | -0.135753 | 1.822330  | 3.088040  |
| C | 0.326228  | 2.108430  | 4.474210  |
| N | 1.286340  | 3.109940  | 4.361580  |
| C | 1.459900  | 3.579670  | 3.066020  |
| C | 1.779890  | 1.733800  | 1.292110  |
| C | -0.022531 | 3.422860  | 0.968419  |
| C | -1.165470 | 0.961674  | 2.993740  |
| O | -0.039851 | 1.614640  | 5.530120  |
| O | 2.115050  | 4.560130  | 2.774800  |
| H | 1.694870  | 3.567070  | 5.167520  |
| H | -1.563890 | 0.547762  | 3.919310  |
| O | -1.761060 | 0.544695  | 1.854950  |
| C | -2.873730 | -0.374025 | 2.033640  |
| H | -2.508950 | -1.249070 | 2.583860  |
| C | -3.404850 | -0.761632 | 0.668029  |
| H | -3.640880 | 0.127353  | 2.635180  |
| H | -4.234930 | -1.464560 | 0.789948  |
| H | -2.630370 | -1.246450 | 0.066838  |
| H | -3.775920 | 0.110822  | 0.122131  |
| C | 2.941560  | 2.586260  | 0.802953  |
| C | 2.274700  | 0.510339  | 2.074450  |
| C | 0.937917  | 1.313160  | 0.059453  |
| C | -0.038684 | 2.461450  | -0.276848 |
| H | 0.675110  | 4.233760  | 0.724142  |
| C | -1.378400 | 4.109300  | 1.273150  |
| H | 0.292407  | 3.016250  | -1.158590 |
| O | -1.321810 | 1.963630  | -0.647797 |
| H | 0.347810  | 0.426766  | 0.314746  |
| H | 1.575860  | 1.041990  | -0.786995 |
| H | 2.925740  | -0.099148 | 1.440230  |
| H | 2.846190  | 0.791720  | 2.965150  |
| H | 1.440660  | -0.118900 | 2.391250  |
| C | 4.244670  | 2.325170  | 0.939776  |
| H | -1.647810 | 1.428850  | 0.091567  |
| C | -1.341010 | 4.973050  | 2.552930  |
| C | -1.803310 | 4.953370  | 0.054478  |
| H | -2.138540 | 3.330810  | 1.422620  |
| H | -2.797210 | 5.386650  | 0.199121  |
| H | -1.099680 | 5.781170  | -0.103554 |
| H | -1.842230 | 4.348150  | -0.852959 |
| H | -1.026310 | 4.357900  | 3.402790  |
| H | -0.585739 | 5.762630  | 2.447670  |
| C | -2.693800 | 5.614520  | 2.933940  |
| C | -2.667560 | 6.220780  | 4.313030  |
| H | -2.983330 | 6.358260  | 2.187640  |
| H | -3.469020 | 4.832640  | 2.906080  |
| C | -2.808440 | 7.510260  | 4.667530  |
| C | -2.743700 | 7.924840  | 6.119760  |
| C | -3.039190 | 8.651920  | 3.706150  |
| H | -3.062940 | 8.340460  | 2.660220  |
| H | -3.988240 | 9.158060  | 3.928850  |
| H | -2.250760 | 9.408690  | 3.813580  |
| H | -1.933450 | 8.647420  | 6.287160  |
| H | -3.673400 | 8.421360  | 6.429510  |
| H | -2.578630 | 7.069450  | 6.781320  |
| H | -2.498760 | 5.502300  | 5.117860  |

|   |          |          |          |
|---|----------|----------|----------|
| H | 4.986000 | 2.992780 | 0.511190 |
| H | 4.626540 | 1.464050 | 1.478830 |
| H | 2.666990 | 3.482740 | 0.252102 |

Conf 43

|   |           |           |           |
|---|-----------|-----------|-----------|
| C | 0.733188  | 2.601530  | 2.200330  |
| C | -0.139667 | 1.779510  | 3.148280  |
| C | 0.266635  | 2.065190  | 4.552030  |
| N | 1.218530  | 3.077680  | 4.478840  |
| C | 1.443640  | 3.547690  | 3.192000  |
| C | 1.828610  | 1.709320  | 1.406360  |
| C | 0.048549  | 3.381580  | 1.029630  |
| C | -1.169530 | 0.921089  | 3.026680  |
| O | -0.133256 | 1.565660  | 5.592830  |
| O | 2.115950  | 4.526940  | 2.933800  |
| H | 1.589200  | 3.538670  | 5.300820  |
| H | -1.589740 | 0.511091  | 3.944420  |
| O | -1.744370 | 0.503300  | 1.878600  |
| C | -2.868270 | -0.405524 | 2.038280  |
| H | -2.523530 | -1.278140 | 2.604960  |
| C | -3.368560 | -0.801136 | 0.663382  |
| H | -3.645690 | 0.107321  | 2.616440  |
| H | -4.206710 | -1.496800 | 0.770932  |
| H | -2.583050 | -1.296630 | 0.085717  |
| H | -3.719330 | 0.069236  | 0.101026  |
| C | 3.030450  | 2.547700  | 0.988684  |
| C | 2.375330  | 0.529336  | 2.233770  |
| C | 0.993475  | 1.237150  | 0.204084  |
| C | 0.049966  | 2.391980  | -0.195352 |
| H | 0.776821  | 4.165640  | 0.787684  |
| C | -1.303900 | 4.093090  | 1.281150  |
| H | 0.422312  | 2.922050  | -1.075170 |
| O | -1.229450 | 1.912010  | -0.600758 |
| H | 0.380175  | 0.384814  | 0.512207  |
| H | 1.616720  | 0.888485  | -0.623968 |
| H | 3.058280  | -0.062684 | 1.616170  |
| H | 2.939480  | 0.872497  | 3.108280  |
| H | 1.573150  | -0.127492 | 2.580940  |
| C | 3.430900  | 2.839060  | -0.251880 |
| H | -1.587410 | 1.389510  | 0.132238  |
| C | -1.300930 | 4.964620  | 2.555930  |
| C | -1.669620 | 4.933250  | 0.040877  |
| H | -2.082760 | 3.328780  | 1.407800  |
| H | -2.662060 | 5.381810  | 0.143123  |
| H | -0.947705 | 5.748650  | -0.097025 |
| H | -1.682300 | 4.320440  | -0.862350 |
| H | -1.034420 | 4.347550  | 3.421260  |
| H | -0.525926 | 5.737890  | 2.477690  |
| C | -2.654710 | 5.635940  | 2.877370  |
| C | -2.673120 | 6.251240  | 4.252540  |
| H | -2.897720 | 6.380230  | 2.115170  |
| H | -3.444220 | 4.869970  | 2.822070  |
| C | -2.800810 | 7.545910  | 4.592870  |
| C | -2.788180 | 7.969450  | 6.043920  |
| C | -2.966240 | 8.685380  | 3.615540  |
| H | -2.950840 | 8.367260  | 2.571480  |

|   |           |          |           |
|---|-----------|----------|-----------|
| H | -3.913540 | 9.212060 | 3.793650  |
| H | -2.167880 | 9.426790 | 3.752600  |
| H | -1.969770 | 8.675160 | 6.241000  |
| H | -3.718770 | 8.488620 | 6.310960  |
| H | -2.670410 | 7.115410 | 6.717280  |
| H | -2.553820 | 5.535150 | 5.068350  |
| H | 4.338400  | 3.412450 | -0.415760 |
| H | 2.887080  | 2.537190 | -1.141930 |
| H | 3.646280  | 2.903500 | 1.811630  |

Conf 22

|   |           |           |           |
|---|-----------|-----------|-----------|
| C | 0.975189  | 2.743320  | 2.151270  |
| C | 0.216806  | 2.181640  | 3.354290  |
| C | 0.928668  | 2.566600  | 4.602170  |
| N | 1.974900  | 3.395970  | 4.208510  |
| C | 1.998670  | 3.666440  | 2.847050  |
| C | 1.748390  | 1.606930  | 1.292730  |
| C | 0.170797  | 3.490060  | 1.034720  |
| C | -0.907058 | 1.465600  | 3.547280  |
| O | 0.682111  | 2.268050  | 5.761370  |
| O | 2.735730  | 4.483930  | 2.330510  |
| H | 2.566940  | 3.880570  | 4.871930  |
| H | -1.181510 | 1.228450  | 4.574610  |
| O | -1.728330 | 0.985689  | 2.591040  |
| C | -2.911710 | 0.276408  | 3.047390  |
| H | -3.183330 | -0.365548 | 2.206380  |
| C | -4.039490 | 1.228700  | 3.409660  |
| H | -2.627130 | -0.362073 | 3.891420  |
| H | -4.922990 | 0.652198  | 3.704500  |
| H | -4.307990 | 1.858750  | 2.556960  |
| H | -3.763140 | 1.877740  | 4.246010  |
| C | 2.938470  | 2.191810  | 0.541786  |
| C | 2.292380  | 0.451076  | 2.155330  |
| C | 0.625225  | 1.145990  | 0.347166  |
| C | -0.228433 | 2.382400  | -0.009780 |
| H | 0.934906  | 4.105520  | 0.543240  |
| C | -0.979043 | 4.448380  | 1.435090  |
| H | 0.002363  | 2.747520  | -1.013400 |
| O | -1.617330 | 2.066340  | -0.072204 |
| H | -0.011942 | 0.430427  | 0.875225  |
| H | 1.012390  | 0.625863  | -0.533211 |
| H | 2.745980  | -0.305039 | 1.506540  |
| H | 3.067290  | 0.792469  | 2.850970  |
| H | 1.499770  | -0.028903 | 2.735600  |
| C | 3.103920  | 2.286010  | -0.780345 |
| H | -1.864200 | 1.685840  | 0.783961  |
| C | -0.547369 | 5.470480  | 2.509910  |
| C | -1.496240 | 5.167920  | 0.173489  |
| H | -1.807500 | 3.857350  | 1.845030  |
| H | -2.364800 | 5.791770  | 0.401676  |
| H | -1.804250 | 4.452210  | -0.590742 |
| H | -0.718071 | 5.818720  | -0.246451 |
| H | -0.189941 | 4.939360  | 3.399770  |
| H | 0.305024  | 6.049840  | 2.132750  |
| C | -1.639700 | 6.456690  | 2.982800  |
| C | -2.794930 | 5.793610  | 3.687610  |

|   |           |          |           |
|---|-----------|----------|-----------|
| H | -1.157900 | 7.151470 | 3.687350  |
| H | -1.982440 | 7.073720 | 2.148050  |
| C | -4.114700 | 5.964310 | 3.493820  |
| C | -5.124940 | 5.229250 | 4.345310  |
| C | -4.726350 | 6.885420 | 2.465130  |
| H | -3.986410 | 7.387870 | 1.839650  |
| H | -5.407080 | 6.330960 | 1.805450  |
| H | -5.331020 | 7.660590 | 2.955060  |
| H | -5.771380 | 5.934110 | 4.885640  |
| H | -5.789780 | 4.610950 | 3.726440  |
| H | -4.642310 | 4.581550 | 5.083400  |
| H | -2.497310 | 5.103290 | 4.480430  |
| H | 4.026570  | 2.684900 | -1.191260 |
| H | 2.348130  | 1.987160 | -1.500480 |
| H | 3.757530  | 2.525420 | 1.174900  |

Conf 9

|   |           |           |           |
|---|-----------|-----------|-----------|
| C | 0.893750  | 2.746060  | 2.116000  |
| C | 0.051640  | 2.289040  | 3.306980  |
| C | 0.706396  | 2.739330  | 4.565320  |
| N | 1.787740  | 3.525220  | 4.176430  |
| C | 1.889040  | 3.704960  | 2.803850  |
| C | 1.698840  | 1.534570  | 1.402050  |
| C | 0.176367  | 3.413980  | 0.896149  |
| C | -1.114110 | 1.639510  | 3.483810  |
| O | 0.394753  | 2.519230  | 5.726020  |
| O | 2.664430  | 4.478090  | 2.275190  |
| H | 2.351430  | 4.044200  | 4.838530  |
| H | -1.453870 | 1.492620  | 4.508320  |
| O | -1.917650 | 1.140470  | 2.520860  |
| C | -3.147960 | 0.524946  | 2.992120  |
| H | -2.882480 | -0.273294 | 3.694870  |
| C | -3.904020 | -0.019974 | 1.796790  |
| H | -3.730760 | 1.285890  | 3.523630  |
| H | -4.826400 | -0.498364 | 2.140910  |
| H | -3.309720 | -0.765649 | 1.261020  |
| H | -4.174950 | 0.777691  | 1.098840  |
| C | 2.942470  | 2.041450  | 0.682182  |
| C | 2.167690  | 0.444969  | 2.386410  |
| C | 0.626127  | 1.015220  | 0.429918  |
| C | -0.166956 | 2.234040  | -0.088837 |
| H | 0.977627  | 3.988260  | 0.414391  |
| C | -0.989400 | 4.402040  | 1.149690  |
| H | 0.150005  | 2.513920  | -1.096260 |
| O | -1.553350 | 1.937660  | -0.235702 |
| H | -0.063516 | 0.366071  | 0.978252  |
| H | 1.051800  | 0.408247  | -0.373844 |
| H | 2.644330  | -0.367991 | 1.829410  |
| H | 2.906100  | 0.830382  | 3.098460  |
| H | 1.332230  | 0.025954  | 2.953770  |
| C | 3.193400  | 2.016510  | -0.629561 |
| H | -1.876920 | 1.637690  | 0.626764  |
| C | -0.636165 | 5.480220  | 2.197990  |
| C | -1.400660 | 5.049860  | -0.187533 |
| H | -1.848680 | 3.834210  | 1.526580  |
| H | -2.275430 | 5.695780  | -0.066011 |

|   |           |          |           |
|---|-----------|----------|-----------|
| H | -0.584851 | 5.668790 | -0.583101 |
| H | -1.657580 | 4.292740 | -0.930588 |
| H | -0.370556 | 4.996660 | 3.144140  |
| H | 0.253169  | 6.029620 | 1.862050  |
| C | -1.751080 | 6.506800 | 2.518550  |
| C | -3.038880 | 5.899730 | 3.015640  |
| H | -1.349240 | 7.211780 | 3.253450  |
| H | -1.964550 | 7.103040 | 1.622350  |
| C | -3.517620 | 5.879710 | 4.272940  |
| C | -4.845920 | 5.229640 | 4.587110  |
| C | -2.822570 | 6.480530 | 5.471560  |
| H | -1.874120 | 6.961250 | 5.225050  |
| H | -3.465070 | 7.227910 | 5.956170  |
| H | -2.619440 | 5.708140 | 6.225180  |
| H | -4.728400 | 4.428400 | 5.329800  |
| H | -5.545840 | 5.955200 | 5.023430  |
| H | -5.313640 | 4.804560 | 3.693800  |
| H | -3.651400 | 5.420460 | 2.250520  |
| H | 4.145840  | 2.369630 | -1.013460 |
| H | 2.481030  | 1.660590 | -1.367730 |
| H | 3.723780  | 2.423190 | 1.335570  |

Conf 19

|   |           |           |           |
|---|-----------|-----------|-----------|
| C | 0.744944  | 2.696930  | 2.011550  |
| C | -0.111163 | 2.057810  | 3.101860  |
| C | 0.408178  | 2.477390  | 4.432840  |
| N | 1.418230  | 3.400820  | 4.178770  |
| C | 1.577920  | 3.703670  | 2.832850  |
| C | 1.742780  | 1.644460  | 1.286820  |
| C | 0.028584  | 3.385380  | 0.802331  |
| C | -1.189230 | 1.253850  | 3.136000  |
| O | 0.048724  | 2.132160  | 5.548220  |
| O | 2.276490  | 4.603550  | 2.411120  |
| H | 1.873600  | 3.926710  | 4.914620  |
| H | -1.581210 | 0.976619  | 4.113860  |
| O | -1.841460 | 0.739532  | 2.070170  |
| C | -3.000480 | -0.079932 | 2.384270  |
| H | -2.673520 | -0.898842 | 3.035430  |
| C | -3.587400 | -0.604316 | 1.088940  |
| H | -3.721940 | 0.539204  | 2.930150  |
| H | -4.453800 | -1.234080 | 1.314240  |
| H | -2.857790 | -1.207800 | 0.541429  |
| H | -3.920370 | 0.212867  | 0.442245  |
| C | 2.933800  | 2.363830  | 0.670671  |
| C | 2.193570  | 0.497042  | 2.199960  |
| C | 0.841928  | 1.129040  | 0.134414  |
| C | -0.079568 | 2.283980  | -0.315724 |
| H | 0.763886  | 4.117280  | 0.445104  |
| C | -1.275580 | 4.185520  | 1.052060  |
| H | 0.254315  | 2.708280  | -1.266190 |
| O | -1.399250 | 1.821560  | -0.592128 |
| H | 0.211956  | 0.315484  | 0.509043  |
| H | 1.438040  | 0.721727  | -0.687614 |
| H | 2.790350  | -0.220980 | 1.629110  |
| H | 2.806890  | 0.849628  | 3.035790  |
| H | 1.336490  | -0.040022 | 2.610950  |

|   |           |          |           |
|---|-----------|----------|-----------|
| C | 4.224260  | 2.045690 | 0.806586  |
| H | -1.730830 | 1.399150 | 0.214445  |
| C | -1.142200 | 5.196020 | 2.212750  |
| C | -1.689730 | 4.896380 | -0.252226 |
| H | -2.073380 | 3.478860 | 1.317070  |
| H | -2.650750 | 5.406250 | -0.139741 |
| H | -1.793960 | 4.186110 | -1.074330 |
| H | -0.943948 | 5.652120 | -0.531460 |
| H | -0.823059 | 4.678270 | 3.122620  |
| H | -0.352051 | 5.921650 | 1.976710  |
| C | -2.442440 | 5.952170 | 2.564720  |
| C | -2.261230 | 6.864150 | 3.750330  |
| H | -2.758110 | 6.558730 | 1.706090  |
| H | -3.244830 | 5.226580 | 2.740530  |
| C | -2.855390 | 6.808380 | 4.955340  |
| C | -2.526830 | 7.821630 | 6.028060  |
| C | -3.878950 | 5.777740 | 5.369300  |
| H | -3.529730 | 5.221820 | 6.249570  |
| H | -4.819700 | 6.264140 | 5.660460  |
| H | -4.105840 | 5.053840 | 4.584220  |
| H | -3.424850 | 8.373260 | 6.337990  |
| H | -2.136950 | 7.328500 | 6.928870  |
| H | -1.782460 | 8.547760 | 5.688610  |
| H | -1.535060 | 7.664140 | 3.592980  |
| H | 4.987480  | 2.613450 | 0.283049  |
| H | 4.574800  | 1.234060 | 1.436100  |
| H | 2.691750  | 3.202850 | 0.022596  |

Conf 35

|   |           |           |           |
|---|-----------|-----------|-----------|
| C | 0.969321  | 2.733640  | 2.148370  |
| C | 0.209811  | 2.242480  | 3.380670  |
| C | 0.959359  | 2.636450  | 4.603420  |
| N | 2.025490  | 3.417540  | 4.166170  |
| C | 2.031260  | 3.647500  | 2.796810  |
| C | 1.694780  | 1.540750  | 1.326280  |
| C | 0.173351  | 3.462840  | 1.014680  |
| C | -0.949646 | 1.599390  | 3.614090  |
| O | 0.725699  | 2.379060  | 5.775020  |
| O | 2.782030  | 4.426620  | 2.242270  |
| H | 2.645250  | 3.901860  | 4.804020  |
| H | -1.221380 | 1.414050  | 4.652710  |
| O | -1.830110 | 1.168100  | 2.687770  |
| C | -2.992410 | 0.452449  | 3.183910  |
| H | -3.357100 | 0.962283  | 4.082800  |
| C | -2.681380 | -1.012170 | 3.447360  |
| H | -3.740990 | 0.566315  | 2.396740  |
| H | -3.591130 | -1.526120 | 3.775820  |
| H | -1.926480 | -1.126840 | 4.231620  |
| H | -2.318880 | -1.501920 | 2.538930  |
| C | 2.889180  | 2.057840  | 0.533863  |
| C | 2.217700  | 0.404534  | 2.227120  |
| C | 0.541959  | 1.078760  | 0.418812  |
| C | -0.266175 | 2.330000  | 0.012323  |
| H | 0.947126  | 4.042340  | 0.495567  |
| C | -0.949921 | 4.459840  | 1.394800  |
| H | -0.020834 | 2.646650  | -1.004150 |

|   |           |           |           |
|---|-----------|-----------|-----------|
| O | -1.664900 | 2.061290  | -0.042270 |
| H | -0.116343 | 0.417693  | 0.990482  |
| H | 0.894562  | 0.500227  | -0.439469 |
| H | 2.633990  | -0.392638 | 1.602950  |
| H | 3.016530  | 0.748623  | 2.893720  |
| H | 1.421090  | -0.023731 | 2.841460  |
| C | 3.040110  | 2.081890  | -0.793153 |
| H | -1.933270 | 1.751130  | 0.835518  |
| C | -0.496608 | 5.498330  | 2.444190  |
| C | -1.452290 | 5.161420  | 0.117038  |
| H | -1.791310 | 3.899760  | 1.821180  |
| H | -2.300910 | 5.816680  | 0.332013  |
| H | -0.657112 | 5.777850  | -0.322352 |
| H | -1.784670 | 4.435530  | -0.627185 |
| H | -0.113056 | 4.983560  | 3.332430  |
| H | 0.340971  | 6.080320  | 2.038600  |
| C | -1.590950 | 6.476310  | 2.930900  |
| C | -2.717130 | 5.799530  | 3.669110  |
| H | -1.104350 | 7.187130  | 3.615640  |
| H | -1.963910 | 7.076730  | 2.096970  |
| C | -4.043840 | 5.921250  | 3.486480  |
| C | -5.018850 | 5.169140  | 4.363970  |
| C | -4.697570 | 6.796450  | 2.443760  |
| H | -5.330100 | 7.556420  | 2.922170  |
| H | -3.981840 | 7.315280  | 1.803640  |
| H | -5.358970 | 6.201930  | 1.799470  |
| H | -4.505850 | 4.553780  | 5.109280  |
| H | -5.684690 | 5.861400  | 4.897020  |
| H | -5.667220 | 4.515450  | 3.764210  |
| H | -2.388350 | 5.136860  | 4.473100  |
| H | 3.967210  | 2.435930  | -1.234040 |
| H | 2.268070  | 1.766900  | -1.488740 |
| H | 3.724370  | 2.401240  | 1.140130  |

Conf 13

|   |           |           |          |
|---|-----------|-----------|----------|
| C | 0.934682  | 2.767310  | 2.062750 |
| C | 0.207489  | 2.215540  | 3.286720 |
| C | 0.960734  | 2.593510  | 4.511970 |
| N | 2.008400  | 3.405160  | 4.085490 |
| C | 1.989750  | 3.679490  | 2.724080 |
| C | 1.684990  | 1.623290  | 1.192930 |
| C | 0.102649  | 3.534440  | 0.980114 |
| C | -0.909644 | 1.496090  | 3.498610 |
| O | 0.742843  | 2.299560  | 5.678110 |
| O | 2.706820  | 4.496420  | 2.181390 |
| H | 2.628350  | 3.880060  | 4.730060 |
| H | -1.169370 | 1.252970  | 4.528250 |
| O | -1.738240 | 1.015240  | 2.547930 |
| C | -2.911970 | 0.296130  | 3.013370 |
| H | -3.191400 | -0.340084 | 2.170550 |
| C | -4.040250 | 1.238780  | 3.398760 |
| H | -2.613250 | -0.348274 | 3.848010 |
| H | -3.757040 | 1.881640  | 4.237560 |
| H | -4.916790 | 0.654660  | 3.699340 |
| H | -4.322990 | 1.875230  | 2.555440 |
| C | 2.831550  | 2.218290  | 0.388249 |



|   |           |           |           |
|---|-----------|-----------|-----------|
| C | 2.153080  | 0.425661  | 2.029960  |
| C | 0.563526  | 1.215160  | 0.200485  |
| C | -0.310835 | 2.456300  | -0.086610 |
| H | 0.844124  | 4.179650  | 0.491802  |
| C | -1.043420 | 4.477120  | 1.430160  |
| H | -0.116578 | 2.853900  | -1.086150 |
| O | -1.697480 | 2.125300  | -0.114608 |
| H | -0.068112 | 0.451874  | 0.666121  |
| H | 0.979677  | 0.775107  | -0.710622 |
| H | 2.574350  | -0.344088 | 1.376070  |
| H | 2.923990  | 0.704223  | 2.756160  |
| H | 1.320850  | -0.024429 | 2.574510  |
| C | 4.086980  | 1.766330  | 0.320738  |
| H | -1.914110 | 1.726360  | 0.741682  |
| C | -0.584365 | 5.485900  | 2.506580  |
| C | -1.604430 | 5.213590  | 0.197379  |
| H | -1.853760 | 3.873070  | 1.856290  |
| H | -2.468120 | 5.828700  | 0.464044  |
| H | -0.843998 | 5.876550  | -0.236123 |
| H | -1.933280 | 4.509130  | -0.568455 |
| H | -0.195492 | 4.944830  | 3.376680  |
| H | 0.252159  | 6.076450  | 2.111310  |
| C | -1.667300 | 6.458300  | 3.027310  |
| C | -2.799080 | 5.777590  | 3.753050  |
| H | -1.168510 | 7.143110  | 3.729730  |
| H | -2.036560 | 7.088030  | 2.213630  |
| C | -4.124530 | 5.944260  | 3.598110  |
| C | -5.107320 | 5.189980  | 4.464790  |
| C | -4.768990 | 6.878140  | 2.601420  |
| H | -4.049460 | 7.394340  | 1.963380  |
| H | -5.465270 | 6.330450  | 1.952410  |
| H | -5.363450 | 7.642360  | 3.120180  |
| H | -5.742980 | 5.882410  | 5.033230  |
| H | -5.784990 | 4.577340  | 3.854300  |
| H | -4.601360 | 4.533910  | 5.179460  |
| H | -2.476230 | 5.076370  | 4.526090  |
| H | 4.811830  | 2.254040  | -0.324002 |
| H | 4.447080  | 0.919081  | 0.895579  |
| H | 2.577730  | 3.081240  | -0.222877 |

Conf 20

|   |           |          |          |
|---|-----------|----------|----------|
| C | 0.932658  | 2.756160 | 2.054940 |
| C | 0.207974  | 2.275400 | 3.309500 |
| C | 1.003180  | 2.658030 | 4.506540 |
| N | 2.068600  | 3.419790 | 4.033850 |
| C | 2.027820  | 3.655850 | 2.665440 |
| C | 1.632470  | 1.554910 | 1.221630 |
| C | 0.107449  | 3.506720 | 0.956131 |
| C | -0.946652 | 1.634450 | 3.566390 |
| O | 0.802402  | 2.403660 | 5.684930 |
| O | 2.757300  | 4.433380 | 2.083030 |
| H | 2.718440  | 3.891490 | 4.650770 |
| H | -1.200740 | 1.444280 | 4.608490 |
| O | -1.840730 | 1.206870 | 2.650180 |
| C | -2.996540 | 0.490667 | 3.160150 |
| H | -3.348870 | 0.998267 | 4.065210 |

|   |           |           |           |
|---|-----------|-----------|-----------|
| C | -2.683320 | -0.974940 | 3.415690  |
| H | -3.756030 | 0.606864  | 2.383770  |
| H | -3.589050 | -1.489020 | 3.754900  |
| H | -1.918150 | -1.092350 | 4.189510  |
| H | -2.333360 | -1.462690 | 2.501270  |
| C | 2.777430  | 2.081440  | 0.368636  |
| C | 2.084030  | 0.381100  | 2.100150  |
| C | 0.477134  | 1.140410  | 0.273537  |
| C | -0.347117 | 2.401380  | -0.067787 |
| H | 0.857691  | 4.117190  | 0.437791  |
| C | -1.011910 | 4.489060  | 1.387730  |
| H | -0.134453 | 2.748640  | -1.082260 |
| O | -1.744870 | 2.122910  | -0.088617 |
| H | -0.178734 | 0.434920  | 0.794018  |
| H | 0.854863  | 0.630875  | -0.617931 |
| H | 2.464660  | -0.430138 | 1.471970  |
| H | 2.881170  | 0.666529  | 2.794630  |
| H | 1.251840  | -0.016653 | 2.684160  |
| C | 4.016680  | 1.588100  | 0.292199  |
| H | -1.985430 | 1.795630  | 0.791294  |
| C | -0.532208 | 5.511860  | 2.441130  |
| C | -1.556190 | 5.211870  | 0.139212  |
| H | -1.836130 | 3.915660  | 1.828830  |
| H | -2.399310 | 5.860160  | 0.393097  |
| H | -0.777443 | 5.840260  | -0.312760 |
| H | -1.909610 | 4.499210  | -0.607951 |
| H | -0.111519 | 4.985350  | 3.304900  |
| H | 0.284182  | 6.111040  | 2.017430  |
| C | -1.619210 | 6.468050  | 2.984700  |
| C | -2.711960 | 5.763960  | 3.747260  |
| H | -1.116500 | 7.170160  | 3.666690  |
| H | -2.027040 | 7.081110  | 2.176700  |
| C | -4.045370 | 5.869240  | 3.608300  |
| C | -4.981260 | 5.088800  | 4.503430  |
| C | -4.744190 | 6.751460  | 2.601380  |
| H | -5.417560 | 6.158010  | 1.968610  |
| H | -5.371580 | 7.494450  | 3.112110  |
| H | -4.056520 | 7.290830  | 1.947630  |
| H | -5.640760 | 5.762290  | 5.067430  |
| H | -5.637810 | 4.434280  | 3.913510  |
| H | -4.436180 | 4.470300  | 5.222900  |
| H | -2.348590 | 5.093720  | 4.529770  |
| H | 4.741260  | 2.027210  | -0.386868 |
| H | 4.363780  | 0.753116  | 0.892446  |
| H | 2.536370  | 2.927540  | -0.270536 |

Conf 31

|   |           |          |          |
|---|-----------|----------|----------|
| C | 0.692070  | 2.732860 | 1.936640 |
| C | -0.002412 | 2.001220 | 3.079420 |
| C | 0.633408  | 2.378170 | 4.368410 |
| N | 1.555140  | 3.376520 | 4.061290 |
| C | 1.563830  | 3.740080 | 2.725680 |
| C | 1.671560  | 1.762100 | 1.028620 |
| C | -0.180318 | 3.531150 | 0.888082 |
| C | -1.042190 | 1.151860 | 3.161940 |
| O | 0.415232  | 1.957560 | 5.494100 |

|   |           |           |           |
|---|-----------|-----------|-----------|
| O | 2.165340  | 4.697980  | 2.277830  |
| H | 2.078340  | 3.876790  | 4.769050  |
| H | -1.342280 | 0.790506  | 4.144490  |
| O | -1.751610 | 0.691984  | 2.110080  |
| C | -2.913160 | -0.122580 | 2.420880  |
| H | -2.592770 | -0.940007 | 3.077380  |
| C | -3.490850 | -0.645801 | 1.120990  |
| H | -3.635390 | 0.501734  | 2.959870  |
| H | -4.375190 | -1.253810 | 1.336210  |
| H | -2.765030 | -1.269120 | 0.590948  |
| H | -3.789160 | 0.175520  | 0.463367  |
| C | 3.145590  | 2.047960  | 1.269520  |
| C | 1.373040  | 0.267519  | 1.246800  |
| C | 1.303600  | 2.171090  | -0.427490 |
| C | -0.128607 | 2.711810  | -0.418930 |
| H | 0.423454  | 4.423980  | 0.673060  |
| C | -1.578400 | 4.036120  | 1.325240  |
| H | -0.289969 | 3.360490  | -1.285070 |
| O | -1.126610 | 1.696400  | -0.535485 |
| H | 1.415360  | 1.332330  | -1.120870 |
| H | 1.971110  | 2.972180  | -0.767225 |
| H | 2.015000  | -0.319915 | 0.583516  |
| H | 1.567230  | -0.049946 | 2.274650  |
| H | 0.340644  | 0.018965  | 1.003680  |
| C | 4.064590  | 1.214050  | 1.767350  |
| H | -1.323140 | 1.320340  | 0.335738  |
| C | -1.486100 | 5.014110  | 2.518020  |
| C | -2.301660 | 4.688630  | 0.130887  |
| H | -2.180560 | 3.176030  | 1.644370  |
| H | -3.290400 | 5.054840  | 0.421746  |
| H | -1.731160 | 5.544860  | -0.251489 |
| H | -2.444920 | 3.976380  | -0.685073 |
| H | -0.898078 | 4.560600  | 3.323140  |
| H | -0.936872 | 5.914550  | 2.211110  |
| C | -2.845200 | 5.429880  | 3.122050  |
| C | -2.687200 | 6.193030  | 4.411540  |
| H | -3.422000 | 6.008360  | 2.396070  |
| H | -3.428580 | 4.517160  | 3.321320  |
| C | -3.037130 | 7.462130  | 4.685700  |
| C | -2.787990 | 8.054710  | 6.053810  |
| C | -3.693560 | 8.409380  | 3.709580  |
| H | -3.845290 | 7.976060  | 2.719210  |
| H | -4.671520 | 8.736440  | 4.087780  |
| H | -3.087450 | 9.317200  | 3.589950  |
| H | -2.140190 | 8.939320  | 5.987770  |
| H | -3.727200 | 8.389550  | 6.514850  |
| H | -2.314980 | 7.336370  | 6.729640  |
| H | -2.213920 | 5.625550  | 5.215370  |
| H | 5.097370  | 1.533930  | 1.870450  |
| H | 3.840250  | 0.200897  | 2.085920  |
| H | 3.467870  | 3.045250  | 0.978564  |

Conf 1

|   |          |          |          |
|---|----------|----------|----------|
| C | 0.812863 | 2.873830 | 1.865730 |
| C | 0.077494 | 2.494000 | 3.145760 |
| C | 0.848977 | 2.970920 | 4.321410 |

|   |           |           |           |
|---|-----------|-----------|-----------|
| N | 1.907610  | 3.716250  | 3.805780  |
| C | 1.893800  | 3.829870  | 2.426650  |
| C | 1.549060  | 1.596190  | 1.122880  |
| C | 0.026025  | 3.618760  | 0.715125  |
| C | -1.088880 | 1.881460  | 3.416310  |
| O | 0.635168  | 2.803440  | 5.512410  |
| O | 2.621760  | 4.569120  | 1.790780  |
| H | 2.555500  | 4.227710  | 4.391870  |
| H | -1.386560 | 1.765620  | 4.457220  |
| O | -1.932540 | 1.379070  | 2.491290  |
| C | -3.208950 | 0.888318  | 2.980870  |
| H | -3.013620 | 0.173016  | 3.788460  |
| C | -3.944280 | 0.237021  | 1.826540  |
| H | -3.768020 | 1.738530  | 3.387760  |
| H | -4.915120 | -0.128806 | 2.175470  |
| H | -3.379420 | -0.610983 | 1.428840  |
| H | -4.116190 | 0.950567  | 1.015740  |
| C | 3.062870  | 1.648780  | 1.256670  |
| C | 1.012740  | 0.243908  | 1.626970  |
| C | 1.161680  | 1.798890  | -0.371036 |
| C | -0.151652 | 2.584410  | -0.416477 |
| H | 0.761720  | 4.331560  | 0.316626  |
| C | -1.230060 | 4.444190  | 1.093990  |
| H | -0.254449 | 3.087430  | -1.382640 |
| O | -1.315740 | 1.763730  | -0.309144 |
| H | 1.080290  | 0.843837  | -0.898306 |
| H | 1.933820  | 2.391090  | -0.876868 |
| H | 1.497580  | -0.559127 | 1.063730  |
| H | 1.217930  | 0.084812  | 2.688840  |
| H | -0.061162 | 0.148158  | 1.470590  |
| C | 3.856110  | 0.763062  | 1.868330  |
| H | -1.517430 | 1.591540  | 0.623025  |
| C | -0.874508 | 5.586950  | 2.072350  |
| C | -1.903800 | 4.993360  | -0.178145 |
| H | -1.948730 | 3.782010  | 1.589630  |
| H | -2.794480 | 5.578890  | 0.067936  |
| H | -1.221150 | 5.650420  | -0.732440 |
| H | -2.218880 | 4.184160  | -0.841024 |
| H | -0.390926 | 5.169220  | 2.961530  |
| H | -0.134615 | 6.243490  | 1.593500  |
| C | -2.054000 | 6.460920  | 2.565580  |
| C | -3.158580 | 5.699060  | 3.254700  |
| H | -1.641700 | 7.225690  | 3.231780  |
| H | -2.481510 | 7.008630  | 1.716170  |
| C | -3.410220 | 5.613560  | 4.573730  |
| C | -4.581490 | 4.809250  | 5.090130  |
| C | -2.592780 | 6.282260  | 5.653020  |
| H | -1.770510 | 6.883790  | 5.261280  |
| H | -3.226230 | 6.934130  | 6.269280  |
| H | -2.163670 | 5.531810  | 6.329890  |
| H | -4.247990 | 4.023660  | 5.782150  |
| H | -5.275840 | 5.444710  | 5.656280  |
| H | -5.143480 | 4.338120  | 4.277570  |
| H | -3.833030 | 5.156840  | 2.590030  |
| H | 4.933000  | 0.903946  | 1.875530  |
| H | 3.482600  | -0.120853 | 2.375780  |

|        |           |           |           |
|--------|-----------|-----------|-----------|
| H      | 3.531420  | 2.504640  | 0.775891  |
| Conf 5 |           |           |           |
| C      | 0.855338  | 2.769340  | 2.025910  |
| C      | 0.044604  | 2.317900  | 3.238010  |
| C      | 0.743498  | 2.754070  | 4.477330  |
| N      | 1.825910  | 3.523510  | 4.058770  |
| C      | 1.883230  | 3.713340  | 2.684350  |
| C      | 1.640480  | 1.552830  | 1.296260  |
| C      | 0.106522  | 3.461290  | 0.838281  |
| C      | -1.116240 | 1.667130  | 3.434790  |
| O      | 0.462141  | 2.533140  | 5.645650  |
| O      | 2.639360  | 4.486680  | 2.130880  |
| H      | 2.419570  | 4.027940  | 4.705620  |
| H      | -1.439210 | 1.511590  | 4.463360  |
| O      | -1.930980 | 1.171220  | 2.478410  |
| C      | -3.157160 | 0.556885  | 2.961490  |
| H      | -2.886120 | -0.235747 | 3.668490  |
| C      | -3.919810 | 0.001545  | 1.775160  |
| H      | -3.738180 | 1.320620  | 3.491010  |
| H      | -4.839200 | -0.475678 | 2.128770  |
| H      | -3.327720 | -0.747458 | 1.241530  |
| H      | -4.196770 | 0.793158  | 1.072670  |
| C      | 2.839010  | 2.071900  | 0.515590  |
| C      | 2.042170  | 0.421147  | 2.251070  |
| C      | 0.570424  | 1.079890  | 0.278307  |
| C      | -0.246339 | 2.310100  | -0.174368 |
| H      | 0.883712  | 4.068610  | 0.357424  |
| C      | -1.061180 | 4.434080  | 1.144700  |
| H      | 0.037766  | 2.623940  | -1.182200 |
| O      | -1.633220 | 2.001910  | -0.289699 |
| H      | -0.111344 | 0.380966  | 0.774137  |
| H      | 1.025290  | 0.544875  | -0.560649 |
| H      | 2.484820  | -0.404385 | 1.685240  |
| H      | 2.777590  | 0.747404  | 2.993960  |
| H      | 1.173990  | 0.027629  | 2.783380  |
| C      | 4.089190  | 1.602260  | 0.554126  |
| H      | -1.928580 | 1.681050  | 0.575662  |
| C      | -0.682596 | 5.496540  | 2.200580  |
| C      | -1.518410 | 5.103800  | -0.166569 |
| H      | -1.903180 | 3.851750  | 1.537440  |
| H      | -2.393200 | 5.740560  | -0.004615 |
| H      | -0.720344 | 5.737620  | -0.574894 |
| H      | -1.793160 | 4.359560  | -0.916037 |
| H      | -0.382037 | 4.999290  | 3.128660  |
| H      | 0.191111  | 6.059110  | 1.845520  |
| C      | -1.794400 | 6.508320  | 2.574400  |
| C      | -3.062100 | 5.882820  | 3.099610  |
| H      | -1.374810 | 7.202470  | 3.309660  |
| H      | -2.039800 | 7.119670  | 1.696740  |
| C      | -3.500660 | 5.835080  | 4.370750  |
| C      | -4.814960 | 5.171160  | 4.713470  |
| C      | -2.771080 | 6.415880  | 5.558600  |
| H      | -1.833110 | 6.906360  | 5.292100  |
| H      | -3.401600 | 7.149980  | 6.077950  |
| H      | -2.540480 | 5.629740  | 6.289690  |

|   |           |          |           |
|---|-----------|----------|-----------|
| H | -4.669950 | 4.356590 | 5.436510  |
| H | -5.504660 | 5.884060 | 5.185430  |
| H | -5.308250 | 4.760680 | 3.827090  |
| H | -3.696070 | 5.415280 | 2.344750  |
| H | 4.856650  | 2.031900 | -0.082570 |
| H | 4.403210  | 0.796662 | 1.210160  |
| H | 2.633550  | 2.889440 | -0.171445 |

Conf 6

|   |           |           |           |
|---|-----------|-----------|-----------|
| C | 0.956428  | 2.830980  | 1.936310  |
| C | 0.368856  | 2.524860  | 3.308710  |
| C | 1.253080  | 3.081540  | 4.363100  |
| N | 2.250410  | 3.787980  | 3.691740  |
| C | 2.083190  | 3.822410  | 2.313780  |
| C | 1.618250  | 1.530480  | 1.181390  |
| C | 0.038026  | 3.510120  | 0.841534  |
| C | -0.754838 | 1.919590  | 3.734020  |
| O | 1.163710  | 2.995740  | 5.578650  |
| O | 2.729880  | 4.523240  | 1.561530  |
| H | 2.936970  | 4.355070  | 4.173830  |
| H | -0.944092 | 1.862710  | 4.804960  |
| O | -1.678360 | 1.354550  | 2.930280  |
| C | -2.913200 | 0.925592  | 3.563930  |
| H | -2.655610 | 0.310416  | 4.434180  |
| C | -3.722950 | 0.143196  | 2.549210  |
| H | -3.448160 | 1.818750  | 3.905410  |
| H | -4.664600 | -0.177147 | 3.006230  |
| H | -3.181540 | -0.746841 | 2.215890  |
| H | -3.956310 | 0.756458  | 1.674240  |
| C | 3.132080  | 1.493340  | 1.306260  |
| C | 1.137920  | 0.188108  | 1.791100  |
| C | 1.108600  | 1.672020  | -0.272123 |
| C | -0.226564 | 2.419690  | -0.217318 |
| H | 0.713631  | 4.214920  | 0.337140  |
| C | -1.188460 | 4.332610  | 1.311580  |
| H | -0.443628 | 2.872520  | -1.189360 |
| O | -1.348950 | 1.576350  | 0.050297  |
| H | 1.007770  | 0.703601  | -0.770809 |
| H | 1.807750  | 2.281480  | -0.855319 |
| H | 1.577190  | -0.628177 | 1.209810  |
| H | 1.468800  | 0.074176  | 2.827690  |
| H | 0.054292  | 0.075075  | 1.759020  |
| C | 4.026470  | 1.366640  | 0.323743  |
| H | -1.460550 | 1.464810  | 1.006370  |
| C | -0.754601 | 5.549090  | 2.160760  |
| C | -2.017840 | 4.783230  | 0.093634  |
| H | -1.831550 | 3.697910  | 1.931550  |
| H | -2.883860 | 5.374340  | 0.404209  |
| H | -2.393640 | 3.925700  | -0.469379 |
| H | -1.417280 | 5.406040  | -0.581959 |
| H | -0.089444 | 5.221210  | 2.967590  |
| H | -0.158624 | 6.223690  | 1.531120  |
| C | -1.897540 | 6.360950  | 2.811750  |
| C | -2.664320 | 5.597360  | 3.860980  |
| H | -1.436170 | 7.236420  | 3.292800  |
| H | -2.564510 | 6.763290  | 2.044490  |

|   |           |          |           |
|---|-----------|----------|-----------|
| C | -3.994320 | 5.446750 | 3.994320  |
| C | -4.573300 | 4.677690 | 5.160670  |
| C | -5.029680 | 6.023020 | 3.057870  |
| H | -5.677840 | 6.731620 | 3.591000  |
| H | -4.597090 | 6.546700 | 2.203590  |
| H | -5.686330 | 5.231720 | 2.672170  |
| H | -5.228730 | 5.317590 | 5.766880  |
| H | -5.196280 | 3.840520 | 4.815240  |
| H | -3.792750 | 4.280110 | 5.816330  |
| H | -2.035410 | 5.136140 | 4.625700  |
| H | 5.086690  | 1.292000 | 0.546146  |
| H | 3.749690  | 1.338890 | -0.725709 |
| H | 3.501860  | 1.492780 | 2.333230  |

Conf 2

|   |           |           |           |
|---|-----------|-----------|-----------|
| C | 0.803933  | 2.825890  | 1.951240  |
| C | 0.026351  | 2.486140  | 3.217370  |
| C | 0.771293  | 2.976190  | 4.404200  |
| N | 1.867640  | 3.677930  | 3.904240  |
| C | 1.891510  | 3.769330  | 2.519290  |
| C | 1.530920  | 1.534190  | 1.242120  |
| C | 0.064358  | 3.572270  | 0.768577  |
| C | -1.158260 | 1.898120  | 3.462670  |
| O | 0.516166  | 2.845790  | 5.592020  |
| O | 2.651750  | 4.478820  | 1.891550  |
| H | 2.495360  | 4.205780  | 4.498070  |
| H | -1.490600 | 1.805720  | 4.495410  |
| O | -1.982160 | 1.397450  | 2.519370  |
| C | -3.275440 | 0.922135  | 2.978860  |
| H | -3.107880 | 0.204617  | 3.790720  |
| C | -3.990920 | 0.279199  | 1.807510  |
| H | -3.834050 | 1.778870  | 3.372500  |
| H | -4.973440 | -0.076319 | 2.133670  |
| H | -3.426190 | -0.574672 | 1.422400  |
| H | -4.136480 | 0.994831  | 0.993402  |
| C | 3.011470  | 1.446930  | 1.571810  |
| C | 0.937777  | 0.185429  | 1.725510  |
| C | 1.229970  | 1.743390  | -0.260619 |
| C | -0.080255 | 2.529690  | -0.359070 |
| H | 0.821509  | 4.273230  | 0.390647  |
| C | -1.193460 | 4.415130  | 1.098070  |
| H | -0.149432 | 3.023660  | -1.332850 |
| O | -1.250830 | 1.713250  | -0.281279 |
| H | 1.173920  | 0.797079  | -0.806582 |
| H | 2.018060  | 2.351480  | -0.718351 |
| H | 1.431430  | -0.621775 | 1.176050  |
| H | 1.120780  | 0.022777  | 2.791810  |
| H | -0.133881 | 0.107409  | 1.542000  |
| C | 4.030220  | 1.331260  | 0.717359  |
| H | -1.496560 | 1.570520  | 0.645068  |
| C | -0.851182 | 5.570140  | 2.066880  |
| C | -1.824950 | 4.951130  | -0.201018 |
| H | -1.933500 | 3.769860  | 1.584300  |
| H | -2.715820 | 5.549620  | 0.010898  |
| H | -1.119920 | 5.592270  | -0.745797 |
| H | -2.129640 | 4.134900  | -0.860226 |

|   |           |          |           |
|---|-----------|----------|-----------|
| H | -0.390289 | 5.162790 | 2.972870  |
| H | -0.095661 | 6.213450 | 1.594400  |
| C | -2.034530 | 6.460170 | 2.520360  |
| C | -3.157920 | 5.717440 | 3.200310  |
| H | -1.630690 | 7.233710 | 3.181730  |
| H | -2.440970 | 6.995840 | 1.653240  |
| C | -3.422080 | 5.639290 | 4.517330  |
| C | -4.609370 | 4.853890 | 5.026100  |
| C | -2.603100 | 6.298490 | 5.601270  |
| H | -1.774010 | 6.893390 | 5.213710  |
| H | -3.233090 | 6.954860 | 6.216240  |
| H | -2.183060 | 5.542940 | 6.278140  |
| H | -4.293360 | 4.065700 | 5.723380  |
| H | -5.299050 | 5.501220 | 5.584440  |
| H | -5.171370 | 4.388580 | 4.210180  |
| H | -3.834200 | 5.183400 | 2.530910  |
| H | 5.047170  | 1.216660 | 1.080400  |
| H | 3.901400  | 1.351860 | -0.360483 |
| H | 3.235100  | 1.396290 | 2.638980  |

Conf 12

|   |           |           |           |
|---|-----------|-----------|-----------|
| C | 0.688805  | 2.774720  | 1.869940  |
| C | -0.100847 | 2.183280  | 3.031840  |
| C | 0.506030  | 2.618880  | 4.316500  |
| N | 1.506380  | 3.526860  | 3.976940  |
| C | 1.595100  | 3.781810  | 2.619390  |
| C | 1.635180  | 1.672990  | 1.084650  |
| C | -0.083052 | 3.542660  | 0.724368  |
| C | -1.198220 | 1.411870  | 3.130920  |
| O | 0.214148  | 2.302730  | 5.459470  |
| O | 2.279510  | 4.659370  | 2.127840  |
| H | 2.031230  | 4.048310  | 4.668000  |
| H | -1.561230 | 1.148460  | 4.123300  |
| O | -1.894920 | 0.918336  | 2.085580  |
| C | -3.112490 | 0.194178  | 2.404780  |
| H | -2.863500 | -0.595252 | 3.123560  |
| C | -3.677030 | -0.379619 | 1.120540  |
| H | -3.813870 | 0.892912  | 2.875750  |
| H | -4.602430 | -0.920839 | 1.341340  |
| H | -2.972260 | -1.076710 | 0.658346  |
| H | -3.904120 | 0.412361  | 0.401365  |
| C | 3.114460  | 1.879720  | 1.370230  |
| C | 1.225820  | 0.223224  | 1.402430  |
| C | 1.355770  | 1.988500  | -0.413793 |
| C | -0.035250 | 2.620250  | -0.512187 |
| H | 0.589443  | 4.373670  | 0.469127  |
| C | -1.458850 | 4.173550  | 1.057200  |
| H | -0.116869 | 3.207200  | -1.431870 |
| O | -1.094710 | 1.665710  | -0.596014 |
| H | 1.438090  | 1.092060  | -1.035410 |
| H | 2.089940  | 2.715040  | -0.782431 |
| H | 1.851820  | -0.455786 | 0.815759  |
| H | 1.356240  | -0.023869 | 2.459280  |
| H | 0.189328  | 0.024698  | 1.132320  |
| C | 3.952790  | 1.029090  | 1.971450  |
| H | -1.352220 | 1.374210  | 0.291553  |



|   |           |          |           |
|---|-----------|----------|-----------|
| C | -1.339610 | 5.243050 | 2.166720  |
| C | -2.088310 | 4.767490 | -0.218102 |
| H | -2.130200 | 3.385250 | 1.420350  |
| H | -3.054630 | 5.231980 | -0.002187 |
| H | -1.439870 | 5.540430 | -0.650372 |
| H | -2.258190 | 3.996730 | -0.973589 |
| H | -0.787695 | 4.838910 | 3.021040  |
| H | -0.741668 | 6.084880 | 1.789760  |
| C | -2.684520 | 5.771820 | 2.710680  |
| C | -2.491800 | 6.800050 | 3.795050  |
| H | -3.256330 | 6.231620 | 1.893870  |
| H | -3.283820 | 4.926690 | 3.067810  |
| C | -2.852820 | 6.738130 | 5.088900  |
| C | -2.555500 | 7.882760 | 6.030510  |
| C | -3.567810 | 5.574830 | 5.734260  |
| H | -3.781860 | 4.759560 | 5.040500  |
| H | -2.969400 | 5.165400 | 6.558760  |
| H | -4.520070 | 5.903180 | 6.172060  |
| H | -3.479940 | 8.283700 | 6.467990  |
| H | -1.931840 | 7.548750 | 6.870760  |
| H | -2.035440 | 8.701910 | 5.525430  |
| H | -1.974950 | 7.704390 | 3.467830  |
| H | 5.000140  | 1.287580 | 2.097140  |
| H | 3.646220  | 0.061186 | 2.355530  |
| H | 3.516200  | 2.827720 | 1.019520  |

Conf 53

|   |           |           |           |
|---|-----------|-----------|-----------|
| C | 0.729068  | 2.593530  | 2.176430  |
| C | -0.160371 | 1.742500  | 3.082570  |
| C | 0.198358  | 2.006360  | 4.502370  |
| N | 1.138950  | 3.031890  | 4.477470  |
| C | 1.397400  | 3.528890  | 3.207030  |
| C | 1.859040  | 1.730940  | 1.398050  |
| C | 0.070073  | 3.387410  | 1.000190  |
| C | -1.170710 | 0.869615  | 2.910710  |
| O | -0.227866 | 1.482990  | 5.521060  |
| O | 2.064910  | 4.520940  | 2.988160  |
| H | 1.478190  | 3.481960  | 5.318830  |
| H | -1.613170 | 0.430879  | 3.804440  |
| O | -1.688110 | 0.459092  | 1.733830  |
| C | -2.833670 | -0.431686 | 1.807460  |
| H | -2.836030 | -0.949944 | 0.845971  |
| C | -4.130810 | 0.328092  | 2.034730  |
| H | -2.647440 | -1.168910 | 2.596740  |
| H | -4.970110 | -0.375659 | 2.038580  |
| H | -4.299750 | 1.059170  | 1.238770  |
| H | -4.125100 | 0.852703  | 2.995260  |
| C | 3.062060  | 2.592430  | 1.034180  |
| C | 2.395770  | 0.541141  | 2.217930  |
| C | 1.067410  | 1.272350  | 0.161134  |
| C | 0.116560  | 2.420090  | -0.241478 |
| H | 0.797493  | 4.182120  | 0.792728  |
| C | -1.295590 | 4.082120  | 1.224490  |
| H | 0.501868  | 2.971450  | -1.102400 |
| O | -1.145690 | 1.928910  | -0.686996 |
| H | 0.460355  | 0.402920  | 0.431495  |

|   |           |           |           |
|---|-----------|-----------|-----------|
| H | 1.721040  | 0.952633  | -0.655012 |
| H | 3.105130  | -0.029321 | 1.609870  |
| H | 2.928240  | 0.873290  | 3.116240  |
| H | 1.592110  | -0.132887 | 2.526530  |
| C | 3.496270  | 2.914950  | -0.187172 |
| H | -1.507850 | 1.381740  | 0.025872  |
| C | -1.336370 | 4.933670  | 2.512080  |
| C | -1.635350 | 4.937480  | -0.012746 |
| H | -2.069790 | 3.308510  | 1.317710  |
| H | -2.633710 | 5.376950  | 0.069631  |
| H | -0.916701 | 5.760350  | -0.119910 |
| H | -1.619270 | 4.337780  | -0.924690 |
| H | -1.090280 | 4.305000  | 3.375120  |
| H | -0.565242 | 5.713460  | 2.468550  |
| C | -2.703660 | 5.590740  | 2.804700  |
| C | -2.767050 | 6.181260  | 4.189350  |
| H | -2.928780 | 6.346920  | 2.048740  |
| H | -3.486200 | 4.821180  | 2.712350  |
| C | -2.914890 | 7.468610  | 4.548800  |
| C | -2.948070 | 7.865920  | 6.006910  |
| C | -3.060510 | 8.624230  | 3.587460  |
| H | -4.015830 | 9.141900  | 3.748270  |
| H | -2.271140 | 9.367890  | 3.759850  |
| H | -3.013930 | 8.324810  | 2.538800  |
| H | -2.142140 | 8.574890  | 6.240320  |
| H | -3.890670 | 8.372230  | 6.255930  |
| H | -2.842150 | 7.000890  | 6.668090  |
| H | -2.665750 | 5.451590  | 4.995530  |
| H | 4.400880  | 3.502820  | -0.310880 |
| H | 2.984230  | 2.625340  | -1.099890 |
| H | 3.648160  | 2.938360  | 1.882660  |

Conf 37

|   |           |           |          |
|---|-----------|-----------|----------|
| C | 0.779161  | 2.646860  | 2.086550 |
| C | -0.130518 | 1.970380  | 3.111950 |
| C | 0.289826  | 2.379890  | 4.479540 |
| N | 1.289870  | 3.332110  | 4.305770 |
| C | 1.536490  | 3.654530  | 2.978230 |
| C | 1.828340  | 1.625460  | 1.391780 |
| C | 0.132468  | 3.333410  | 0.837965 |
| C | -1.195150 | 1.147480  | 3.074490 |
| O | -0.132861 | 2.010220  | 5.564750 |
| O | 2.255760  | 4.567970  | 2.622870 |
| H | 1.681070  | 3.859150  | 5.076940 |
| H | -1.632700 | 0.848696  | 4.026450 |
| O | -1.774320 | 0.629929  | 1.970630 |
| C | -2.963060 | -0.177821 | 2.183100 |
| H | -3.026660 | -0.806011 | 1.291810 |
| C | -4.208590 | 0.677404  | 2.352580 |
| H | -2.790130 | -0.825241 | 3.050320 |
| H | -5.084210 | 0.029044  | 2.464910 |
| H | -4.364900 | 1.316860  | 1.478920 |
| H | -4.140970 | 1.311400  | 3.242140 |
| C | 3.068550  | 2.357680  | 0.894102 |
| C | 2.319280  | 0.511907  | 2.337790 |
| C | 0.969980  | 1.072000  | 0.241111 |

|   |           |           |           |
|---|-----------|-----------|-----------|
| C | 0.076695  | 2.220850  | -0.274691 |
| H | 0.901547  | 4.046230  | 0.515068  |
| C | -1.177640 | 4.141950  | 1.008450  |
| H | 0.464456  | 2.636960  | -1.207530 |
| O | -1.227870 | 1.761460  | -0.621245 |
| H | 0.321331  | 0.281792  | 0.631326  |
| H | 1.575900  | 0.615368  | -0.546218 |
| H | 2.972580  | -0.171981 | 1.786560  |
| H | 2.900170  | 0.915776  | 3.174610  |
| H | 1.487320  | -0.067359 | 2.747320  |
| C | 3.480110  | 2.501900  | -0.368474 |
| H | -1.597340 | 1.329380  | 0.163349  |
| C | -1.110640 | 5.150140  | 2.176590  |
| C | -1.506020 | 4.853840  | -0.319377 |
| H | -1.995410 | 3.440660  | 1.222920  |
| H | -2.470230 | 5.367750  | -0.268754 |
| H | -0.740262 | 5.605180  | -0.552112 |
| H | -1.561110 | 4.142650  | -1.145600 |
| H | -0.867650 | 4.624890  | 3.106020  |
| H | -0.292348 | 5.861000  | 1.999760  |
| C | -2.417970 | 5.931080  | 2.435560  |
| C | -2.305330 | 6.836450  | 3.634590  |
| H | -2.656940 | 6.546180  | 1.558380  |
| H | -3.246070 | 5.222130  | 2.548940  |
| C | -2.997570 | 6.800940  | 4.786870  |
| C | -2.725820 | 7.804260  | 5.884550  |
| C | -4.084770 | 5.804660  | 5.113550  |
| H | -3.828380 | 5.239460  | 6.019560  |
| H | -5.030330 | 6.321630  | 5.325790  |
| H | -4.268980 | 5.087370  | 4.311400  |
| H | -3.627860 | 8.385400  | 6.120050  |
| H | -2.427920 | 7.300020  | 6.813920  |
| H | -1.932710 | 8.505310  | 5.608720  |
| H | -1.543800 | 7.612970  | 3.538650  |
| H | 4.413970  | 3.011230  | -0.586942 |
| H | 2.920790  | 2.137840  | -1.225050 |
| H | 3.702590  | 2.765120  | 1.678370  |

Conf 24

|   |           |           |          |
|---|-----------|-----------|----------|
| C | 0.829502  | 2.737850  | 2.111160 |
| C | -0.076486 | 2.285570  | 3.256310 |
| C | 0.542858  | 2.677520  | 4.550410 |
| N | 1.671100  | 3.425900  | 4.225760 |
| C | 1.835470  | 3.635470  | 2.863340 |
| C | 1.611200  | 1.514030  | 1.392540 |
| C | 0.186528  | 3.467480  | 0.884657 |
| C | -1.273800 | 1.680400  | 3.366410 |
| O | 0.175064  | 2.441700  | 5.691690 |
| O | 2.663540  | 4.387570  | 2.386820 |
| H | 2.228650  | 3.903720  | 4.923080 |
| H | -1.665790 | 1.520760  | 4.370160 |
| O | -2.058770 | 1.260200  | 2.352840 |
| C | -3.291380 | 0.588698  | 2.726110 |
| H | -3.738800 | 1.127160  | 3.569190 |
| C | -3.058210 | -0.878820 | 3.047520 |
| H | -3.942510 | 0.708271  | 1.857310 |

|         |           |           |           |
|---------|-----------|-----------|-----------|
| H       | -2.611130 | -1.397270 | 2.194360  |
| H       | -4.014910 | -1.359120 | 3.279270  |
| H       | -2.400590 | -0.999797 | 3.914100  |
| C       | 2.899660  | 1.988580  | 0.731858  |
| C       | 2.000170  | 0.380708  | 2.362130  |
| C       | 0.555221  | 1.065210  | 0.368236  |
| C       | -0.167661 | 2.329230  | -0.145067 |
| H       | 1.028570  | 4.019520  | 0.448612  |
| C       | -0.946031 | 4.497500  | 1.122430  |
| H       | 0.199051  | 2.622010  | -1.131720 |
| O       | -1.558380 | 2.095470  | -0.353036 |
| H       | -0.180553 | 0.431594  | 0.872671  |
| H       | 0.985662  | 0.462406  | -0.436142 |
| H       | 2.462530  | -0.436858 | 1.799830  |
| H       | 2.728250  | 0.716416  | 3.109160  |
| H       | 1.128920  | -0.017344 | 2.889290  |
| C       | 3.198900  | 1.984930  | -0.569977 |
| H       | -1.929750 | 1.800260  | 0.491824  |
| C       | -0.587469 | 5.533060  | 2.211180  |
| C       | -1.279860 | 5.196100  | -0.210855 |
| H       | -1.842010 | 3.957990  | 1.452500  |
| H       | -0.424805 | 5.789580  | -0.559852 |
| H       | -1.540330 | 4.469660  | -0.982719 |
| H       | -2.130940 | 5.875280  | -0.103503 |
| H       | -0.370438 | 5.015210  | 3.151540  |
| H       | 0.332054  | 6.057090  | 1.918620  |
| C       | -1.673920 | 6.591740  | 2.524860  |
| C       | -2.996360 | 6.019590  | 2.969470  |
| H       | -1.269310 | 7.264040  | 3.288280  |
| H       | -1.839460 | 7.216420  | 1.637910  |
| C       | -3.515320 | 5.992400  | 4.210560  |
| C       | -4.873810 | 5.381770  | 4.469990  |
| C       | -2.839620 | 6.547210  | 5.441990  |
| H       | -1.867010 | 6.997470  | 5.235330  |
| H       | -3.470910 | 7.308920  | 5.918990  |
| H       | -2.689330 | 5.755200  | 6.187590  |
| H       | -4.806740 | 4.563870  | 5.200680  |
| H       | -5.563200 | 6.122520  | 4.897530  |
| H       | -5.325890 | 4.988330  | 3.554470  |
| H       | -3.599680 | 5.575370  | 2.176450  |
| H       | 4.178150  | 2.309210  | -0.909311 |
| H       | 2.501970  | 1.675150  | -1.342910 |
| H       | 3.669940  | 2.323420  | 1.422930  |
| Conf 57 |           |           |           |
| C       | 0.691507  | 2.610450  | 2.168600  |
| C       | -0.238818 | 1.786240  | 3.058390  |
| C       | 0.127174  | 2.009530  | 4.483280  |
| N       | 1.115590  | 2.989300  | 4.477760  |
| C       | 1.400120  | 3.495620  | 3.216510  |
| C       | 1.781570  | 1.711450  | 1.375930  |
| C       | 0.069869  | 3.454510  | 1.006480  |
| C       | -1.293030 | 0.970795  | 2.869250  |
| O       | -0.325405 | 1.488620  | 5.491800  |
| O       | 2.114050  | 4.458810  | 3.016060  |
| H       | 1.473340  | 3.408530  | 5.327340  |
| H       | -1.762880 | 0.542998  | 3.754230  |

|   |           |           |           |
|---|-----------|-----------|-----------|
| O | -1.847830 | 0.635014  | 1.685750  |
| C | -2.950140 | -0.309736 | 1.734080  |
| H | -3.598370 | -0.044683 | 2.577200  |
| C | -2.458570 | -1.745440 | 1.824860  |
| H | -3.501860 | -0.134552 | 0.807812  |
| H | -3.315890 | -2.427010 | 1.813980  |
| H | -1.899740 | -1.920090 | 2.749660  |
| H | -1.814240 | -1.990110 | 0.975460  |
| C | 3.022000  | 2.523660  | 1.024400  |
| C | 2.265030  | 0.486171  | 2.176460  |
| C | 0.969406  | 1.309550  | 0.132918  |
| C | 0.077211  | 2.508960  | -0.253233 |
| H | 0.831062  | 4.221050  | 0.814932  |
| C | -1.265300 | 4.203020  | 1.242660  |
| H | 0.495109  | 3.056750  | -1.101110 |
| O | -1.203550 | 2.088130  | -0.716578 |
| H | 0.318765  | 0.468660  | 0.391529  |
| H | 1.606400  | 0.968915  | -0.687977 |
| H | 2.946960  | -0.106617 | 1.558460  |
| H | 2.813230  | 0.780226  | 3.078570  |
| H | 1.432030  | -0.155086 | 2.476980  |
| C | 3.472790  | 2.840190  | -0.192518 |
| H | -1.608110 | 1.564540  | -0.008821 |
| C | -1.271580 | 5.030110  | 2.546650  |
| C | -1.564490 | 5.097240  | 0.022483  |
| H | -2.072970 | 3.462450  | 1.319760  |
| H | -0.811212 | 5.890890  | -0.065789 |
| H | -1.571090 | 4.516260  | -0.901605 |
| H | -2.543610 | 5.576740  | 0.111853  |
| H | -1.051620 | 4.375470  | 3.397240  |
| H | -0.469294 | 5.778600  | 2.517710  |
| C | -2.611360 | 5.735880  | 2.852860  |
| C | -2.649820 | 6.303600  | 4.247900  |
| H | -2.806830 | 6.513780  | 2.110800  |
| H | -3.423740 | 4.999590  | 2.748210  |
| C | -2.744480 | 7.589280  | 4.630490  |
| C | -2.760840 | 7.961480  | 6.095510  |
| C | -2.842830 | 8.766980  | 3.690160  |
| H | -2.808590 | 8.484760  | 2.636280  |
| H | -3.776220 | 9.320260  | 3.860970  |
| H | -2.023750 | 9.474610  | 3.875230  |
| H | -1.926270 | 8.632330  | 6.340740  |
| H | -3.681680 | 8.501700  | 6.354530  |
| H | -2.690540 | 7.081100  | 6.741000  |
| H | -2.578670 | 5.556000  | 5.040750  |
| H | 4.402790  | 3.388800  | -0.308041 |
| H | 2.950470  | 2.583730  | -1.109300 |
| H | 3.620860  | 2.833790  | 1.877730  |

### Cartesian Coordinates of Conformers (>2% population) of 1b

Conf 2

|   |           |           |           |
|---|-----------|-----------|-----------|
| C | 1.181460  | 2.582350  | 0.382043  |
| C | 1.589550  | 1.135190  | 0.662204  |
| C | 1.375440  | 0.842703  | 2.094690  |
| N | 0.720509  | 1.974990  | 2.616630  |
| C | 0.439421  | 2.951400  | 1.681220  |
| C | 2.449010  | 3.570010  | 0.174308  |
| C | 0.354292  | 2.881690  | -0.907587 |
| C | 2.011630  | 0.221744  | -0.241957 |
| O | 1.641720  | -0.142830 | 2.760460  |
| O | -0.249763 | 3.934650  | 1.891450  |
| H | 0.356996  | 1.999890  | 3.561460  |
| H | 2.075010  | 0.476358  | -1.299130 |
| O | 2.355520  | -1.031170 | 0.088789  |
| C | 2.706130  | -1.903080 | -1.007580 |
| H | 3.510710  | -1.436840 | -1.590590 |
| C | 3.146370  | -3.230770 | -0.422361 |
| H | 1.830830  | -2.024420 | -1.658330 |
| H | 3.415630  | -3.920110 | -1.229340 |
| H | 4.015490  | -3.097710 | 0.228049  |
| H | 2.341650  | -3.679610 | 0.166633  |
| C | 2.076330  | 5.019990  | 0.455429  |
| C | 3.649630  | 3.232670  | 1.080000  |
| C | 2.761200  | 3.320280  | -1.312360 |
| C | 1.424550  | 3.088710  | -2.034950 |
| H | -0.077017 | 3.872880  | -0.718060 |
| C | -0.817375 | 1.949890  | -1.305110 |
| H | 1.145580  | 3.948150  | -2.655070 |
| O | 1.620720  | 1.953470  | -2.900480 |
| H | 3.353520  | 2.405320  | -1.410460 |
| H | 3.357320  | 4.122390  | -1.754600 |
| H | 4.492240  | 3.884290  | 0.826937  |
| H | 3.416090  | 3.395520  | 2.137770  |
| H | 3.969130  | 2.194530  | 0.956987  |
| C | 2.074520  | 6.046930  | -0.399563 |
| H | 0.857278  | 1.861750  | -3.485010 |
| C | -1.759070 | 1.625320  | -0.126487 |
| C | -1.609990 | 2.592850  | -2.463560 |
| H | -0.403328 | 0.998726  | -1.661330 |
| H | -2.352770 | 1.902560  | -2.871720 |
| H | -2.137000 | 3.490940  | -2.118460 |
| H | -0.970880 | 2.903950  | -3.298150 |
| H | -1.176960 | 1.167350  | 0.680693  |
| H | -2.171860 | 2.557910  | 0.277705  |
| C | -2.924030 | 0.662841  | -0.452079 |
| C | -2.467920 | -0.704332 | -0.893567 |
| H | -3.514970 | 0.554065  | 0.469628  |
| H | -3.600200 | 1.114300  | -1.183740 |
| C | -2.879220 | -1.434200 | -1.945650 |
| C | -2.313240 | -2.812820 | -2.200770 |
| C | -3.926530 | -1.000130 | -2.943830 |
| H | -3.528370 | -1.041020 | -3.966650 |
| H | -4.786060 | -1.683540 | -2.919170 |
| H | -4.302540 | 0.009378  | -2.766760 |
| H | -3.106170 | -3.572880 | -2.187140 |

|   |           |           |           |
|---|-----------|-----------|-----------|
| H | -1.844880 | -2.870850 | -3.193030 |
| H | -1.565720 | -3.091260 | -1.452180 |
| H | -1.713970 | -1.154480 | -0.244095 |
| H | 1.827870  | 7.047300  | -0.056410 |
| H | 2.307120  | 5.947380  | -1.455860 |
| H | 1.823760  | 5.230300  | 1.492100  |

Conf 3

|   |           |           |           |
|---|-----------|-----------|-----------|
| C | 1.161600  | 2.540000  | 0.337749  |
| C | 1.514120  | 1.095350  | 0.696745  |
| C | 1.264310  | 0.881905  | 2.136890  |
| N | 0.639625  | 2.060250  | 2.589900  |
| C | 0.408996  | 2.997620  | 1.602420  |
| C | 2.464870  | 3.474410  | 0.107372  |
| C | 0.368535  | 2.801810  | -0.980963 |
| C | 1.912710  | 0.122245  | -0.154493 |
| O | 1.486200  | -0.076797 | 2.856110  |
| O | -0.249740 | 4.012640  | 1.750110  |
| H | 0.261511  | 2.144640  | 3.525500  |
| H | 2.014120  | 0.324565  | -1.220160 |
| O | 2.159720  | -1.136160 | 0.234662  |
| C | 2.652710  | -2.042740 | -0.773253 |
| H | 2.175790  | -1.811140 | -1.734010 |
| C | 4.170120  | -1.989980 | -0.875695 |
| H | 2.314000  | -3.029360 | -0.448133 |
| H | 4.520180  | -2.735500 | -1.598230 |
| H | 4.511970  | -1.005550 | -1.211610 |
| H | 4.627540  | -2.204840 | 0.094409  |
| C | 2.136430  | 4.948120  | 0.309238  |
| C | 3.636590  | 3.143610  | 1.052370  |
| C | 2.795810  | 3.141210  | -1.358780 |
| C | 1.465560  | 2.918270  | -2.095730 |
| H | -0.033098 | 3.814540  | -0.848807 |
| C | -0.825432 | 1.889210  | -1.355810 |
| H | 1.227100  | 3.755020  | -2.762100 |
| O | 1.639450  | 1.736440  | -2.901780 |
| H | 3.358120  | 2.203270  | -1.399680 |
| H | 3.426990  | 3.900110  | -1.827860 |
| H | 4.505750  | 3.752800  | 0.783772  |
| H | 3.389660  | 3.367710  | 2.095790  |
| H | 3.921680  | 2.090280  | 0.988124  |
| C | 2.182850  | 5.930130  | -0.595803 |
| H | 0.882937  | 1.640470  | -3.494600 |
| C | -1.798410 | 1.651960  | -0.181817 |
| C | -1.575920 | 2.499510  | -2.559140 |
| H | -0.436287 | 0.909124  | -1.657450 |
| H | -2.334320 | 1.814600  | -2.947160 |
| H | -2.078420 | 3.430270  | -2.268360 |
| H | -0.912527 | 2.748080  | -3.395830 |
| H | -1.245280 | 1.221460  | 0.660025  |
| H | -2.193180 | 2.615060  | 0.164843  |
| C | -2.981950 | 0.703930  | -0.481708 |
| C | -2.552650 | -0.695727 | -0.840907 |
| H | -3.594020 | 0.659085  | 0.431499  |
| H | -3.631130 | 1.132870  | -1.250460 |
| C | -2.962390 | -1.470350 | -1.861120 |

|   |           |           |           |
|---|-----------|-----------|-----------|
| C | -2.426990 | -2.874090 | -2.030980 |
| C | -3.978930 | -1.064510 | -2.902060 |
| H | -3.562300 | -1.169370 | -3.912920 |
| H | -4.855930 | -1.724430 | -2.859290 |
| H | -4.332420 | -0.038107 | -2.786120 |
| H | -3.239190 | -3.612690 | -1.992080 |
| H | -1.942400 | -2.996970 | -3.009440 |
| H | -1.700230 | -3.129520 | -1.254370 |
| H | -1.822630 | -1.128930 | -0.153725 |
| H | 1.964180  | 6.954070  | -0.307618 |
| H | 2.428890  | 5.769650  | -1.641500 |
| H | 1.874170  | 5.218390  | 1.329460  |

Conf 6

|   |           |           |           |
|---|-----------|-----------|-----------|
| C | 1.149000  | 2.576570  | 0.371434  |
| C | 1.575520  | 1.131050  | 0.627169  |
| C | 1.410880  | 0.826593  | 2.063820  |
| N | 0.758316  | 1.947100  | 2.612960  |
| C | 0.439924  | 2.928200  | 1.693930  |
| C | 2.402150  | 3.578830  | 0.147144  |
| C | 0.286718  | 2.876160  | -0.896379 |
| C | 1.952010  | 0.223042  | -0.301543 |
| O | 1.710820  | -0.159594 | 2.713990  |
| O | -0.248199 | 3.905110  | 1.933260  |
| H | 0.422796  | 1.961290  | 3.568290  |
| H | 1.963420  | 0.484088  | -1.359090 |
| O | 2.307950  | -1.033140 | 0.003691  |
| C | 2.570370  | -1.907760 | -1.114420 |
| H | 3.340450  | -1.451760 | -1.750480 |
| C | 3.031950  | -3.242220 | -0.561830 |
| H | 1.651440  | -2.015670 | -1.704060 |
| H | 3.235560  | -3.933990 | -1.385790 |
| H | 3.945240  | -3.122270 | 0.027822  |
| H | 2.263170  | -3.680810 | 0.080386  |
| C | 2.024360  | 5.022550  | 0.451379  |
| C | 3.626800  | 3.241330  | 1.019950  |
| C | 2.679970  | 3.348350  | -1.350240 |
| C | 1.320040  | 3.115760  | -2.042340 |
| H | -0.153703 | 3.858360  | -0.684238 |
| C | -0.885015 | 1.933580  | -1.274290 |
| H | 1.011490  | 3.985040  | -2.634380 |
| O | 1.374740  | 1.972480  | -2.922140 |
| H | 3.275190  | 2.436140  | -1.463490 |
| H | 3.262490  | 4.162520  | -1.791930 |
| H | 4.458000  | 3.903390  | 0.756131  |
| H | 3.416460  | 3.388970  | 2.084730  |
| H | 3.951400  | 2.207240  | 0.877044  |
| C | 1.983180  | 6.056190  | -0.394360 |
| H | 1.913270  | 2.205450  | -3.689100 |
| C | -1.804990 | 1.626330  | -0.074027 |
| C | -1.683200 | 2.561250  | -2.433870 |
| H | -0.472203 | 0.985363  | -1.633650 |
| H | -2.467950 | 1.885980  | -2.785300 |
| H | -2.162670 | 3.496460  | -2.116620 |
| H | -1.039820 | 2.775840  | -3.290550 |
| H | -1.209720 | 1.193290  | 0.737935  |



|   |           |           |           |
|---|-----------|-----------|-----------|
| H | -2.223870 | 2.563050  | 0.314902  |
| C | -2.963260 | 0.642827  | -0.358576 |
| C | -2.497510 | -0.736918 | -0.747172 |
| H | -3.550930 | 0.564339  | 0.568441  |
| H | -3.644190 | 1.060050  | -1.105630 |
| C | -2.891300 | -1.503800 | -1.779170 |
| C | -2.314150 | -2.886650 | -1.980930 |
| C | -3.923690 | -1.107600 | -2.807860 |
| H | -4.776110 | -1.799970 | -2.782890 |
| H | -4.312810 | -0.097911 | -2.664030 |
| H | -3.503820 | -1.168510 | -3.820930 |
| H | -3.102790 | -3.651020 | -1.955590 |
| H | -1.829680 | -2.972900 | -2.963440 |
| H | -1.577060 | -3.136430 | -1.212010 |
| H | -1.749160 | -1.160970 | -0.073911 |
| H | 1.735640  | 7.050770  | -0.035593 |
| H | 2.181020  | 5.967840  | -1.458760 |
| H | 1.802670  | 5.221530  | 1.497210  |

Conf 18

|   |           |           |           |
|---|-----------|-----------|-----------|
| C | 1.243540  | 2.446720  | 0.220001  |
| C | 1.883410  | 1.063950  | 0.351719  |
| C | 1.543370  | 0.500192  | 1.675290  |
| N | 0.618313  | 1.398290  | 2.241040  |
| C | 0.278961  | 2.457080  | 1.421800  |
| C | 2.311910  | 3.656190  | 0.361647  |
| C | 0.550085  | 2.815970  | -1.128700 |
| C | 2.588120  | 0.402040  | -0.594391 |
| O | 1.906830  | -0.523682 | 2.227350  |
| O | -0.608672 | 3.258730  | 1.655960  |
| H | 0.132624  | 1.197820  | 3.106720  |
| H | 2.739460  | 0.838859  | -1.580780 |
| O | 3.121810  | -0.811654 | -0.394716 |
| C | 3.757890  | -1.421620 | -1.538250 |
| H | 4.517140  | -0.734383 | -1.933200 |
| C | 4.377950  | -2.728210 | -1.082960 |
| H | 3.002530  | -1.589480 | -2.316760 |
| H | 4.865610  | -3.221680 | -1.930050 |
| H | 5.125180  | -2.551190 | -0.304230 |
| H | 3.613670  | -3.398870 | -0.680495 |
| C | 1.632000  | 4.952670  | 0.782586  |
| C | 3.425120  | 3.379320  | 1.391000  |
| C | 2.858960  | 3.718720  | -1.075690 |
| C | 1.697160  | 3.395240  | -2.028380 |
| H | -0.089154 | 3.669450  | -0.869727 |
| C | -0.352796 | 1.777240  | -1.838750 |
| H | 1.340700  | 4.290670  | -2.549890 |
| O | 2.218270  | 2.478900  | -3.011050 |
| H | 3.621140  | 2.944650  | -1.208180 |
| H | 3.345550  | 4.671910  | -1.297130 |
| H | 4.151870  | 4.197910  | 1.371850  |
| H | 3.027170  | 3.318650  | 2.409760  |
| H | 3.952440  | 2.446560  | 1.174500  |
| C | 1.546080  | 6.094360  | 0.093553  |
| H | 1.579730  | 2.383680  | -3.729370 |
| C | -1.346630 | 1.077670  | -0.887903 |

|   |           |           |           |
|---|-----------|-----------|-----------|
| C | -1.105840 | 2.464700  | -2.998590 |
| H | 0.289222  | 0.994041  | -2.263790 |
| H | -0.442217 | 3.026750  | -3.666120 |
| H | -1.641070 | 1.739150  | -3.617300 |
| H | -1.840230 | 3.179900  | -2.608320 |
| H | -0.786897 | 0.592744  | -0.081145 |
| H | -1.996160 | 1.822330  | -0.411213 |
| C | -2.219800 | -0.006508 | -1.557860 |
| C | -2.965510 | -0.838424 | -0.546842 |
| H | -2.911550 | 0.449944  | -2.270800 |
| H | -1.563640 | -0.668845 | -2.144270 |
| C | -4.292530 | -0.935240 | -0.352926 |
| C | -4.852470 | -1.827970 | 0.730718  |
| C | -5.340720 | -0.200042 | -1.153970 |
| H | -6.016970 | -0.910211 | -1.648680 |
| H | -5.965590 | 0.415447  | -0.493256 |
| H | -4.921740 | 0.453805  | -1.921260 |
| H | -4.061890 | -2.342580 | 1.284400  |
| H | -5.450200 | -1.248970 | 1.447650  |
| H | -5.522970 | -2.588150 | 0.307251  |
| H | -2.323800 | -1.422980 | 0.115210  |
| H | 1.067600  | 6.965650  | 0.530839  |
| H | 1.932440  | 6.216160  | -0.914272 |
| H | 1.207690  | 4.937790  | 1.783760  |

Conf 1

|   |           |           |           |
|---|-----------|-----------|-----------|
| C | 1.154450  | 2.581610  | 0.278612  |
| C | 1.512700  | 1.104020  | 0.443427  |
| C | 1.234400  | 0.692941  | 1.834970  |
| N | 0.588047  | 1.793350  | 2.430610  |
| C | 0.370789  | 2.856550  | 1.576620  |
| C | 2.456030  | 3.544390  | 0.209302  |
| C | 0.389856  | 3.020170  | -1.009960 |
| C | 1.945700  | 0.261356  | -0.522039 |
| O | 1.448200  | -0.354611 | 2.420270  |
| O | -0.299201 | 3.838070  | 1.848420  |
| H | 0.188990  | 1.746210  | 3.360090  |
| H | 2.051470  | 0.603714  | -1.550690 |
| O | 2.257170  | -1.021290 | -0.288677 |
| C | 2.576420  | -1.819430 | -1.448410 |
| H | 3.336690  | -1.297570 | -2.043750 |
| C | 3.081550  | -3.164330 | -0.963098 |
| H | 1.671840  | -1.930740 | -2.059630 |
| H | 3.321470  | -3.801400 | -1.820720 |
| H | 3.982490  | -3.043300 | -0.354899 |
| H | 2.322270  | -3.666170 | -0.356874 |
| C | 2.111400  | 4.975230  | 0.602069  |
| C | 3.608140  | 3.092670  | 1.128030  |
| C | 2.823030  | 3.415410  | -1.280040 |
| C | 1.511310  | 3.294320  | -2.071760 |
| H | -0.022214 | 4.003030  | -0.748171 |
| C | -0.789384 | 2.163710  | -1.534560 |
| H | 1.283060  | 4.215620  | -2.619590 |
| O | 1.709750  | 2.237330  | -3.031020 |
| H | 3.390250  | 2.492550  | -1.435720 |
| H | 3.461640  | 4.232200  | -1.625570 |

|   |           |           |           |
|---|-----------|-----------|-----------|
| H | 4.478470  | 3.736720  | 0.965553  |
| H | 3.335840  | 3.171350  | 2.186150  |
| H | 3.903060  | 2.059390  | 0.927373  |
| C | 2.174360  | 6.072050  | -0.158602 |
| H | 0.976959  | 2.235320  | -3.660160 |
| C | -1.784100 | 1.766380  | -0.423172 |
| C | -1.515990 | 2.932150  | -2.659510 |
| H | -0.381770 | 1.237120  | -1.956430 |
| H | -0.835733 | 3.292580  | -3.439890 |
| H | -2.267100 | 2.310010  | -3.154330 |
| H | -2.027440 | 3.814240  | -2.255140 |
| H | -1.250400 | 1.194580  | 0.342864  |
| H | -2.162750 | 2.674450  | 0.063263  |
| C | -2.992060 | 0.906844  | -0.871724 |
| C | -2.625030 | -0.391387 | -1.547260 |
| H | -3.605910 | 0.717469  | 0.014857  |
| H | -3.627060 | 1.492080  | -1.549160 |
| C | -2.610650 | -1.626430 | -1.013900 |
| C | -2.216300 | -2.826310 | -1.843990 |
| C | -2.967830 | -1.950480 | 0.416901  |
| H | -2.107300 | -2.393450 | 0.935158  |
| H | -3.286890 | -1.078420 | 0.990717  |
| H | -3.773930 | -2.695240 | 0.454715  |
| H | -1.958830 | -2.546600 | -2.870100 |
| H | -1.354910 | -3.345050 | -1.401770 |
| H | -3.032250 | -3.560430 | -1.886440 |
| H | -2.333170 | -0.307290 | -2.595370 |
| H | 1.940840  | 7.046130  | 0.260886  |
| H | 2.449150  | 6.057120  | -1.209340 |
| H | 1.820580  | 5.102340  | 1.642230  |

Conf 9

|   |           |           |           |
|---|-----------|-----------|-----------|
| C | 1.210150  | 2.506860  | 0.181362  |
| C | 1.717010  | 1.066080  | 0.259900  |
| C | 1.373550  | 0.506481  | 1.584440  |
| N | 0.561777  | 1.475760  | 2.204000  |
| C | 0.295905  | 2.580890  | 1.419800  |
| C | 2.396000  | 3.603470  | 0.307019  |
| C | 0.507834  | 2.975080  | -1.131530 |
| C | 2.320830  | 0.362892  | -0.725218 |
| O | 1.657600  | -0.559774 | 2.101580  |
| O | -0.501395 | 3.457890  | 1.704090  |
| H | 0.089412  | 1.301100  | 3.082540  |
| H | 2.477510  | 0.806438  | -1.707730 |
| O | 2.743710  | -0.900204 | -0.569929 |
| C | 3.283530  | -1.538350 | -1.746800 |
| H | 4.088300  | -0.913353 | -2.154780 |
| C | 3.797800  | -2.905340 | -1.339410 |
| H | 2.490730  | -1.619970 | -2.501610 |
| H | 4.210140  | -3.421400 | -2.212640 |
| H | 4.583660  | -2.813610 | -0.584345 |
| H | 2.990000  | -3.513620 | -0.923038 |
| C | 1.861430  | 4.948670  | 0.781616  |
| C | 3.514020  | 3.195300  | 1.286270  |
| C | 2.893950  | 3.648700  | -1.148860 |
| C | 1.672740  | 3.460560  | -2.062890 |

|   |           |           |           |
|---|-----------|-----------|-----------|
| H | -0.033323 | 3.881030  | -0.830586 |
| C | -0.520096 | 2.048120  | -1.826840 |
| H | 1.386780  | 4.397770  | -2.553490 |
| O | 2.066080  | 2.520380  | -3.081900 |
| H | 3.573130  | 2.809210  | -1.326610 |
| H | 3.461350  | 4.556470  | -1.368830 |
| H | 4.315300  | 3.940760  | 1.256580  |
| H | 3.149540  | 3.147360  | 2.318130  |
| H | 3.940550  | 2.222150  | 1.029430  |
| C | 1.860300  | 6.109950  | 0.120563  |
| H | 1.395530  | 2.503690  | -3.776800 |
| C | -1.545920 | 1.436570  | -0.849146 |
| C | -1.237480 | 2.833080  | -2.946780 |
| H | 0.024238  | 1.212950  | -2.287680 |
| H | -1.862370 | 2.179790  | -3.561690 |
| H | -1.883710 | 3.608780  | -2.518050 |
| H | -0.542406 | 3.341560  | -3.625090 |
| H | -1.015360 | 0.892532  | -0.061790 |
| H | -2.103050 | 2.240630  | -0.350813 |
| C | -2.538500 | 0.443053  | -1.492280 |
| C | -3.460050 | -0.172733 | -0.471312 |
| H | -3.151000 | 0.964967  | -2.239530 |
| H | -1.977620 | -0.326268 | -2.035300 |
| C | -3.558170 | -1.459660 | -0.094233 |
| C | -4.547490 | -1.880590 | 0.968413  |
| C | -2.732800 | -2.592660 | -0.656225 |
| H | -3.382580 | -3.361650 | -1.095270 |
| H | -2.024600 | -2.274180 | -1.423490 |
| H | -2.162640 | -3.084470 | 0.142881  |
| H | -5.255200 | -2.623460 | 0.575957  |
| H | -4.035130 | -2.354820 | 1.816360  |
| H | -5.122340 | -1.031700 | 1.349820  |
| H | -4.117090 | 0.541902  | 0.028083  |
| H | 1.485340  | 7.012070  | 0.594795  |
| H | 2.217910  | 6.218940  | -0.899251 |
| H | 1.476050  | 4.950050  | 1.798550  |

Conf 21

|   |           |           |           |
|---|-----------|-----------|-----------|
| C | 1.260160  | 2.463120  | 0.228998  |
| C | 1.932440  | 1.101300  | 0.410382  |
| C | 1.579070  | 0.562914  | 1.740160  |
| N | 0.622507  | 1.453000  | 2.265520  |
| C | 0.273742  | 2.481590  | 1.412900  |
| C | 2.294790  | 3.702960  | 0.355670  |
| C | 0.582082  | 2.778200  | -1.141000 |
| C | 2.679980  | 0.436776  | -0.500764 |
| O | 1.953220  | -0.439081 | 2.324620  |
| O | -0.636895 | 3.267530  | 1.609560  |
| H | 0.124651  | 1.262460  | 3.126500  |
| H | 2.837480  | 0.848274  | -1.497360 |
| O | 3.265510  | -0.742154 | -0.249256 |
| C | 3.889390  | -1.409800 | -1.365220 |
| H | 4.687150  | -2.008380 | -0.919076 |
| C | 2.898250  | -2.287450 | -2.115540 |
| H | 4.345050  | -0.661182 | -2.025940 |
| H | 3.413020  | -2.829480 | -2.916580 |

|   |           |           |           |
|---|-----------|-----------|-----------|
| H | 2.442770  | -3.016780 | -1.439500 |
| H | 2.101100  | -1.688530 | -2.568040 |
| C | 1.575240  | 4.993160  | 0.727581  |
| C | 3.395470  | 3.483470  | 1.412020  |
| C | 2.866540  | 3.739760  | -1.073040 |
| C | 1.730630  | 3.360910  | -2.036510 |
| H | -0.082088 | 3.622500  | -0.917035 |
| C | -0.282709 | 1.698480  | -1.836960 |
| H | 1.361810  | 4.232310  | -2.589100 |
| O | 2.291220  | 2.430950  | -2.984470 |
| H | 3.650110  | 2.982030  | -1.170160 |
| H | 3.333280  | 4.698460  | -1.312610 |
| H | 4.101160  | 4.320010  | 1.383150  |
| H | 2.980220  | 3.440290  | 2.424740  |
| H | 3.950560  | 2.559300  | 1.231190  |
| C | 1.475490  | 6.113410  | 0.005952  |
| H | 1.670770  | 2.305940  | -3.713980 |
| C | -1.277320 | 1.002550  | -0.884099 |
| C | -1.030380 | 2.334080  | -3.029340 |
| H | 0.385804  | 0.919457  | -2.227620 |
| H | -1.535640 | 1.578430  | -3.637120 |
| H | -1.789570 | 3.040980  | -2.672920 |
| H | -0.368182 | 2.894000  | -3.699940 |
| H | -0.721253 | 0.553414  | -0.054488 |
| H | -1.951840 | 1.745070  | -0.439923 |
| C | -2.113850 | -0.119633 | -1.537850 |
| C | -2.861170 | -0.937382 | -0.516575 |
| H | -2.801310 | 0.300169  | -2.276950 |
| H | -1.432370 | -0.784379 | -2.091910 |
| C | -4.189390 | -1.067780 | -0.352883 |
| C | -4.750730 | -1.937860 | 0.748343  |
| C | -5.237670 | -0.394564 | -1.206560 |
| H | -5.877360 | -1.142830 | -1.693680 |
| H | -5.899510 | 0.222661  | -0.584646 |
| H | -4.818520 | 0.245663  | -1.985170 |
| H | -5.383860 | -1.352030 | 1.428390  |
| H | -5.387150 | -2.732890 | 0.336445  |
| H | -3.959950 | -2.407780 | 1.340150  |
| H | -2.220210 | -1.478430 | 0.182205  |
| H | 0.967540  | 6.984100  | 0.409928  |
| H | 1.878800  | 6.217630  | -0.997208 |
| H | 1.131580  | 4.994900  | 1.720440  |

Conf 19

|   |           |           |           |
|---|-----------|-----------|-----------|
| C | 1.113220  | 2.624490  | 0.179555  |
| C | 1.458840  | 1.152120  | 0.395197  |
| C | 1.183720  | 0.796827  | 1.803380  |
| N | 0.556338  | 1.926620  | 2.362840  |
| C | 0.336737  | 2.956040  | 1.467390  |
| C | 2.424430  | 3.573900  | 0.092739  |
| C | 0.333609  | 3.015930  | -1.115690 |
| C | 1.898820  | 0.282281  | -0.541527 |
| O | 1.389540  | -0.232043 | 2.423980  |
| O | -0.334528 | 3.946860  | 1.692920  |
| H | 0.164254  | 1.918330  | 3.296370  |
| H | 2.015750  | 0.598564  | -1.577710 |

|   |           |           |           |
|---|-----------|-----------|-----------|
| O | 2.209910  | -0.993485 | -0.270928 |
| C | 2.542560  | -1.821220 | -1.405680 |
| H | 3.309470  | -1.314640 | -2.005760 |
| C | 3.042870  | -3.152740 | -0.880124 |
| H | 1.645090  | -1.949020 | -2.024200 |
| H | 3.293140  | -3.811470 | -1.718200 |
| H | 3.936570  | -3.015250 | -0.264807 |
| H | 2.277000  | -3.639650 | -0.270001 |
| C | 2.076680  | 5.020620  | 0.413977  |
| C | 3.600280  | 3.081600  | 0.946897  |
| C | 2.754760  | 3.477990  | -1.421880 |
| C | 1.437050  | 3.292670  | -2.192190 |
| H | -0.114177 | 3.989200  | -0.877959 |
| C | -0.831741 | 2.120410  | -1.609500 |
| H | 1.177820  | 4.188060  | -2.769330 |
| O | 1.658730  | 2.209940  | -3.116840 |
| H | 3.371420  | 2.592440  | -1.608020 |
| H | 3.327510  | 4.344900  | -1.763000 |
| H | 4.480900  | 3.705550  | 0.764718  |
| H | 3.376740  | 3.125320  | 2.017590  |
| H | 3.865660  | 2.052540  | 0.698573  |
| C | 2.715200  | 5.833250  | 1.260740  |
| H | 0.921471  | 2.165190  | -3.739320 |
| C | -1.816080 | 1.743890  | -0.481885 |
| C | -1.576350 | 2.837030  | -2.756730 |
| H | -0.408641 | 1.187810  | -2.001010 |
| H | -2.319370 | 2.184990  | -3.224350 |
| H | -2.101640 | 3.723720  | -2.380870 |
| H | -0.907386 | 3.180940  | -3.554080 |
| H | -1.269620 | 1.211500  | 0.302857  |
| H | -2.212540 | 2.661080  | -0.027515 |
| C | -3.006050 | 0.843409  | -0.896819 |
| C | -2.611490 | -0.468192 | -1.530620 |
| H | -3.611590 | 0.669242  | -0.001306 |
| H | -3.657360 | 1.390890  | -1.589870 |
| C | -2.530130 | -1.676420 | -0.944554 |
| C | -2.115920 | -2.896660 | -1.734140 |
| C | -2.825420 | -1.947190 | 0.511154  |
| H | -3.592040 | -2.726950 | 0.611467  |
| H | -1.927900 | -2.321770 | 1.020470  |
| H | -3.168820 | -1.064180 | 1.053420  |
| H | -1.220990 | -3.361820 | -1.298960 |
| H | -2.903180 | -3.662390 | -1.716320 |
| H | -1.903050 | -2.654170 | -2.779770 |
| H | -2.357780 | -0.419241 | -2.590820 |
| H | 2.392310  | 6.862840  | 1.382140  |
| H | 3.558610  | 5.518340  | 1.866710  |
| H | 1.236500  | 5.438240  | -0.136015 |

Conf 26

|   |          |          |          |
|---|----------|----------|----------|
| C | 1.229500 | 2.360810 | 0.184630 |
| C | 1.821980 | 0.958133 | 0.329675 |
| C | 1.478270 | 0.426084 | 1.664660 |
| N | 0.592420 | 1.364670 | 2.228200 |
| C | 0.280059 | 2.422260 | 1.397080 |
| C | 2.339820 | 3.534770 | 0.296856 |

|   |           |           |           |
|---|-----------|-----------|-----------|
| C | 0.533683  | 2.734140  | -1.161580 |
| C | 2.485670  | 0.255358  | -0.616966 |
| O | 1.813460  | -0.600996 | 2.228770  |
| O | -0.576170 | 3.258060  | 1.629110  |
| H | 0.110715  | 1.194000  | 3.102440  |
| H | 2.650540  | 0.676749  | -1.608110 |
| O | 2.935570  | -0.992075 | -0.422929 |
| C | 3.686150  | -1.587880 | -1.501080 |
| H | 3.264330  | -1.261780 | -2.460320 |
| C | 5.167340  | -1.253980 | -1.400180 |
| H | 3.515980  | -2.662080 | -1.396370 |
| H | 5.720560  | -1.774060 | -2.190030 |
| H | 5.341570  | -0.179179 | -1.515500 |
| H | 5.566120  | -1.569120 | -0.431597 |
| C | 1.710000  | 4.860600  | 0.704526  |
| C | 3.454010  | 3.235420  | 1.318780  |
| C | 2.872840  | 3.556750  | -1.146880 |
| C | 1.689680  | 3.261060  | -2.082060 |
| H | -0.073372 | 3.612620  | -0.908870 |
| C | -0.411312 | 1.716080  | -1.846430 |
| H | 1.358540  | 4.161310  | -2.611860 |
| O | 2.167500  | 2.314320  | -3.058150 |
| H | 3.605040  | 2.753600  | -1.275220 |
| H | 3.390910  | 4.488310  | -1.388090 |
| H | 3.944850  | 2.280730  | 1.112430  |
| H | 4.209210  | 4.027050  | 1.278240  |
| H | 3.065590  | 3.205580  | 2.342550  |
| C | 1.657620  | 5.994360  | -0.000790 |
| H | 1.515670  | 2.229480  | -3.765810 |
| C | -1.417570 | 1.064130  | -0.875040 |
| C | -1.153690 | 2.411290  | -3.008560 |
| H | 0.199357  | 0.905500  | -2.266240 |
| H | -0.479134 | 2.942130  | -3.690580 |
| H | -1.718490 | 1.694870  | -3.611380 |
| H | -1.860480 | 3.155400  | -2.621410 |
| H | -0.865751 | 0.574612  | -0.065680 |
| H | -2.038470 | 1.836830  | -0.404813 |
| C | -2.330640 | -0.002689 | -1.519100 |
| C | -3.094890 | -0.791599 | -0.487737 |
| H | -3.012790 | 0.463125  | -2.235220 |
| H | -1.700550 | -0.696384 | -2.097840 |
| C | -4.423600 | -0.852686 | -0.290889 |
| C | -5.002820 | -1.705920 | 0.814251  |
| C | -5.455500 | -0.113445 | -1.109180 |
| H | -6.066830 | 0.530784  | -0.463359 |
| H | -5.022400 | 0.512848  | -1.891470 |
| H | -6.147070 | -0.820070 | -1.587560 |
| H | -5.690660 | -2.460840 | 0.409586  |
| H | -4.223600 | -2.224640 | 1.380060  |
| H | -5.586740 | -1.096290 | 1.517050  |
| H | -2.466400 | -1.375530 | 0.187403  |
| H | 1.214310  | 6.888310  | 0.427740  |
| H | 2.038110  | 6.087690  | -1.013880 |
| H | 1.295140  | 4.875530  | 1.709650  |

|   |           |           |           |
|---|-----------|-----------|-----------|
| C | 1.206180  | 2.406990  | 0.186496  |
| C | 1.861740  | 1.031210  | 0.305579  |
| C | 1.571030  | 0.473133  | 1.643400  |
| N | 0.651769  | 1.363210  | 2.230380  |
| C | 0.275883  | 2.413500  | 1.415410  |
| C | 2.264640  | 3.627830  | 0.300927  |
| C | 0.473351  | 2.761620  | -1.146550 |
| C | 2.521920  | 0.362547  | -0.666810 |
| O | 1.965810  | -0.541351 | 2.191140  |
| O | -0.610388 | 3.208870  | 1.673120  |
| H | 0.193635  | 1.162310  | 3.110830  |
| H | 2.623810  | 0.790976  | -1.663240 |
| O | 3.065010  | -0.849890 | -0.483635 |
| C | 3.625690  | -1.478050 | -1.655910 |
| H | 4.376920  | -0.808165 | -2.094660 |
| C | 4.244110  | -2.794300 | -1.226840 |
| H | 2.826900  | -1.634040 | -2.392070 |
| H | 4.676820  | -3.301070 | -2.095660 |
| H | 5.034450  | -2.628510 | -0.489240 |
| H | 3.489190  | -3.448010 | -0.781253 |
| C | 1.583890  | 4.918100  | 0.738530  |
| C | 3.408290  | 3.362270  | 1.299510  |
| C | 2.771530  | 3.695890  | -1.151960 |
| C | 1.580560  | 3.356670  | -2.073220 |
| H | -0.170280 | 3.606270  | -0.871472 |
| C | -0.437525 | 1.710020  | -1.830390 |
| H | 1.191810  | 4.247560  | -2.579610 |
| O | 1.962540  | 2.398980  | -3.083880 |
| H | 3.537870  | 2.926990  | -1.296230 |
| H | 3.241690  | 4.657190  | -1.380310 |
| H | 4.125810  | 4.188440  | 1.262340  |
| H | 3.038260  | 3.296410  | 2.328350  |
| H | 3.938600  | 2.434680  | 1.068250  |
| C | 1.458430  | 6.055290  | 0.048295  |
| H | 2.539170  | 2.842030  | -3.719260 |
| C | -1.411350 | 1.029800  | -0.845568 |
| C | -1.198280 | 2.380530  | -2.991740 |
| H | 0.197769  | 0.927020  | -2.260620 |
| H | -1.783060 | 1.650100  | -3.557980 |
| H | -1.891430 | 3.142880  | -2.613290 |
| H | -0.512477 | 2.857060  | -3.696570 |
| H | -0.838271 | 0.562160  | -0.037241 |
| H | -2.056110 | 1.781470  | -0.372878 |
| C | -2.292210 | -0.071110 | -1.476970 |
| C | -3.019950 | -0.882960 | -0.437145 |
| H | -2.995410 | 0.368421  | -2.188950 |
| H | -1.643260 | -0.743681 | -2.059500 |
| C | -4.343860 | -0.986064 | -0.225621 |
| C | -4.884360 | -1.856380 | 0.885891  |
| C | -5.407040 | -0.279722 | -1.032940 |
| H | -6.082020 | -1.007550 | -1.503300 |
| H | -6.030620 | 0.346308  | -0.380849 |
| H | -5.001410 | 0.358651  | -1.820070 |
| H | -5.479650 | -1.265150 | 1.594950  |
| H | -5.552530 | -2.632870 | 0.488930  |
| H | -4.083230 | -2.350170 | 1.443490  |



|   |           |           |           |
|---|-----------|-----------|-----------|
| H | -2.366490 | -1.446230 | 0.232086  |
| H | 0.982473  | 6.921650  | 0.497810  |
| H | 1.806530  | 6.178030  | -0.973324 |
| H | 1.194130  | 4.902200  | 1.753560  |

Conf 4

|   |           |           |           |
|---|-----------|-----------|-----------|
| C | 1.120750  | 2.570890  | 0.267328  |
| C | 1.503370  | 1.098870  | 0.419644  |
| C | 1.272900  | 0.682986  | 1.818700  |
| N | 0.622361  | 1.771170  | 2.431660  |
| C | 0.365003  | 2.831720  | 1.585030  |
| C | 2.405660  | 3.553970  | 0.177088  |
| C | 0.320264  | 2.998330  | -1.004490 |
| C | 1.898010  | 0.259470  | -0.564254 |
| O | 1.524020  | -0.359711 | 2.397550  |
| O | -0.309762 | 3.803750  | 1.876960  |
| H | 0.247767  | 1.716350  | 3.370830  |
| H | 1.954120  | 0.602652  | -1.596680 |
| O | 2.226170  | -1.021970 | -0.346282 |
| C | 2.465680  | -1.825720 | -1.520730 |
| H | 3.196840  | -1.314580 | -2.160900 |
| C | 2.982030  | -3.176060 | -1.063110 |
| H | 1.525790  | -1.925970 | -2.077700 |
| H | 3.163550  | -3.817350 | -1.931880 |
| H | 3.918180  | -3.065640 | -0.508357 |
| H | 2.252910  | -3.667360 | -0.412909 |
| C | 2.049490  | 4.977780  | 0.583883  |
| C | 3.584260  | 3.113760  | 1.067400  |
| C | 2.741010  | 3.438800  | -1.321860 |
| C | 1.406170  | 3.302330  | -2.084580 |
| H | -0.104158 | 3.971490  | -0.728045 |
| C | -0.857646 | 2.123820  | -1.506190 |
| H | 1.144260  | 4.225640  | -2.613990 |
| O | 1.468900  | 2.234190  | -3.053970 |
| H | 3.317400  | 2.522270  | -1.486180 |
| H | 3.361810  | 4.269600  | -1.670680 |
| H | 4.441530  | 3.771710  | 0.891356  |
| H | 3.333380  | 3.181200  | 2.131500  |
| H | 3.889190  | 2.085910  | 0.853766  |
| C | 2.069370  | 6.077820  | -0.174346 |
| H | 2.046830  | 2.513220  | -3.775550 |
| C | -1.828850 | 1.741030  | -0.369203 |
| C | -1.592900 | 2.869090  | -2.637590 |
| H | -0.447766 | 1.200250  | -1.927270 |
| H | -2.381960 | 2.251060  | -3.075780 |
| H | -2.061760 | 3.786930  | -2.259910 |
| H | -0.910398 | 3.137770  | -3.447470 |
| H | -1.280530 | 1.185360  | 0.399176  |
| H | -2.205960 | 2.654690  | 0.108390  |
| C | -3.039930 | 0.867195  | -0.779942 |
| C | -2.676870 | -0.440952 | -1.436950 |
| H | -3.639130 | 0.692224  | 0.119505  |
| H | -3.686810 | 1.436910  | -1.459380 |
| C | -2.689410 | -1.672560 | -0.895680 |
| C | -2.295170 | -2.882650 | -1.711280 |
| C | -3.078660 | -1.984800 | 0.529547  |

|   |           |           |           |
|---|-----------|-----------|-----------|
| H | -3.902320 | -2.710830 | 0.555341  |
| H | -2.237730 | -2.446470 | 1.063690  |
| H | -3.387650 | -1.104220 | 1.095810  |
| H | -1.448620 | -3.409820 | -1.250410 |
| H | -3.119430 | -3.606880 | -1.765000 |
| H | -2.015390 | -2.611910 | -2.733950 |
| H | -2.362680 | -0.366896 | -2.479130 |
| H | 1.830300  | 7.046110  | 0.255106  |
| H | 2.310730  | 6.071470  | -1.233410 |
| H | 1.787760  | 5.096640  | 1.632640  |

Conf 30

|   |           |           |           |
|---|-----------|-----------|-----------|
| C | 1.093020  | 2.637860  | 0.253777  |
| C | 1.503160  | 1.211340  | 0.612868  |
| C | 1.301380  | 1.005360  | 2.062980  |
| N | 0.647697  | 2.165140  | 2.521510  |
| C | 0.350713  | 3.080330  | 1.528950  |
| C | 2.359320  | 3.621600  | 0.019970  |
| C | 0.252709  | 2.852220  | -1.046140 |
| C | 1.915110  | 0.253210  | -0.246829 |
| O | 1.578510  | 0.061639  | 2.782830  |
| O | -0.349580 | 4.065690  | 1.673880  |
| H | 0.291477  | 2.245190  | 3.465970  |
| H | 1.966800  | 0.455931  | -1.316230 |
| O | 2.264650  | -0.981919 | 0.141785  |
| C | 2.571000  | -1.916640 | -0.914550 |
| H | 3.360360  | -1.491880 | -1.548690 |
| C | 3.020450  | -3.214010 | -0.271031 |
| H | 1.673910  | -2.065060 | -1.528600 |
| H | 3.256360  | -3.950100 | -1.046550 |
| H | 3.912000  | -3.053850 | 0.341885  |
| H | 2.232240  | -3.621030 | 0.368418  |
| C | 1.963870  | 5.080350  | 0.200622  |
| C | 3.583430  | 3.265730  | 0.874048  |
| C | 2.640090  | 3.380770  | -1.489900 |
| C | 1.298210  | 3.061800  | -2.183790 |
| H | -0.229955 | 3.825820  | -0.895321 |
| C | -0.890471 | 1.862510  | -1.395790 |
| H | 0.973604  | 3.882520  | -2.834530 |
| O | 1.405270  | 1.869120  | -2.989510 |
| H | 3.289840  | 2.504770  | -1.597300 |
| H | 3.163310  | 4.232830  | -1.935790 |
| H | 4.432100  | 3.897690  | 0.593824  |
| H | 3.395600  | 3.415160  | 1.942000  |
| H | 3.879490  | 2.225670  | 0.725666  |
| C | 2.600720  | 6.002460  | 0.928131  |
| H | 1.965520  | 2.066650  | -3.750990 |
| C | -1.834990 | 1.611200  | -0.201455 |
| C | -1.671380 | 2.400560  | -2.610850 |
| H | -0.449345 | 0.903677  | -1.685630 |
| H | -2.435670 | 1.689430  | -2.935390 |
| H | -2.175720 | 3.344290  | -2.364960 |
| H | -1.012230 | 2.572240  | -3.465110 |
| H | -1.252590 | 1.245480  | 0.651527  |
| H | -2.284250 | 2.561060  | 0.115291  |
| C | -2.963890 | 0.585073  | -0.451229 |

|   |           |           |           |
|---|-----------|-----------|-----------|
| C | -2.458330 | -0.805276 | -0.739213 |
| H | -3.573490 | 0.551899  | 0.464249  |
| H | -3.634240 | 0.937921  | -1.239870 |
| C | -2.810000 | -1.645330 | -1.728610 |
| C | -2.198840 | -3.024770 | -1.826990 |
| C | -3.825240 | -1.339820 | -2.804260 |
| H | -3.380040 | -1.457490 | -3.801370 |
| H | -4.663670 | -2.047660 | -2.753140 |
| H | -4.238450 | -0.331746 | -2.736030 |
| H | -2.971480 | -3.803610 | -1.769820 |
| H | -1.689250 | -3.163270 | -2.790630 |
| H | -1.475460 | -3.207600 | -1.026850 |
| H | -1.717970 | -1.167850 | -0.022681 |
| H | 2.239220  | 7.026000  | 0.954827  |
| H | 3.479630  | 5.786250  | 1.526910  |
| H | 1.084770  | 5.403280  | -0.352193 |

Conf 7

|   |           |           |           |
|---|-----------|-----------|-----------|
| C | 1.129380  | 2.542130  | 0.333422  |
| C | 1.501080  | 1.098680  | 0.673563  |
| C | 1.292290  | 0.874601  | 2.118560  |
| N | 0.664746  | 2.042680  | 2.593460  |
| C | 0.400136  | 2.983810  | 1.617530  |
| C | 2.419190  | 3.492290  | 0.091478  |
| C | 0.308295  | 2.802860  | -0.969673 |
| C | 1.860980  | 0.130082  | -0.199119 |
| O | 1.545100  | -0.085013 | 2.826230  |
| O | -0.261404 | 3.992970  | 1.788490  |
| H | 0.307046  | 2.116890  | 3.537890  |
| H | 1.916110  | 0.338518  | -1.267080 |
| O | 2.120400  | -1.131530 | 0.171424  |
| C | 2.536470  | -2.041870 | -0.866688 |
| H | 2.012050  | -1.794360 | -1.798090 |
| C | 4.047160  | -2.021790 | -1.050480 |
| H | 2.194860  | -3.023380 | -0.529305 |
| H | 4.341840  | -2.768550 | -1.796140 |
| H | 4.551210  | -2.254620 | -0.108044 |
| H | 4.393120  | -1.041770 | -1.395640 |
| C | 2.081430  | 4.960970  | 0.312095  |
| C | 3.610710  | 3.162290  | 1.011600  |
| C | 2.725850  | 3.176930  | -1.384650 |
| C | 1.376410  | 2.951630  | -2.099220 |
| H | -0.105203 | 3.807810  | -0.818790 |
| C | -0.882975 | 1.878160  | -1.329970 |
| H | 1.110430  | 3.798580  | -2.742010 |
| O | 1.416790  | 1.763980  | -2.919450 |
| H | 3.293320  | 2.241760  | -1.436320 |
| H | 3.345310  | 3.948620  | -1.851660 |
| H | 4.469780  | 3.782220  | 0.734925  |
| H | 3.380160  | 3.372590  | 2.061540  |
| H | 3.903110  | 2.111990  | 0.931093  |
| C | 2.093410  | 5.950210  | -0.586037 |
| H | 1.971400  | 1.945660  | -3.688770 |
| C | -1.840800 | 1.657900  | -0.140272 |
| C | -1.633600 | 2.470330  | -2.538950 |
| H | -0.491392 | 0.901223  | -1.631430 |

|   |           |           |           |
|---|-----------|-----------|-----------|
| H | -2.431240 | 1.802630  | -2.875550 |
| H | -2.090220 | 3.434680  | -2.280820 |
| H | -0.964083 | 2.621490  | -3.389180 |
| H | -1.277840 | 1.255380  | 0.709470  |
| H | -2.246560 | 2.623650  | 0.186692  |
| C | -3.014280 | 0.686632  | -0.403865 |
| C | -2.570120 | -0.721759 | -0.705415 |
| H | -3.627870 | 0.671328  | 0.509475  |
| H | -3.665330 | 1.077780  | -1.190650 |
| C | -2.957890 | -1.536300 | -1.702580 |
| C | -2.406200 | -2.939520 | -1.814740 |
| C | -3.959220 | -1.176570 | -2.774470 |
| H | -3.520310 | -1.305040 | -3.773050 |
| H | -4.828300 | -1.846860 | -2.728740 |
| H | -4.327080 | -0.151720 | -2.696850 |
| H | -1.691310 | -3.160780 | -1.016780 |
| H | -3.211450 | -3.685210 | -1.765730 |
| H | -1.902200 | -3.089570 | -2.779610 |
| H | -1.845570 | -1.123100 | 0.006606  |
| H | 1.869690  | 6.969240  | -0.284833 |
| H | 2.312920  | 5.800740  | -1.639310 |
| H | 1.841820  | 5.220620  | 1.340520  |

Conf 8

|   |           |           |           |
|---|-----------|-----------|-----------|
| C | 1.185200  | 2.476340  | 0.155171  |
| C | 1.714320  | 1.043180  | 0.209585  |
| C | 1.432770  | 0.476045  | 1.545630  |
| N | 0.627628  | 1.429760  | 2.196750  |
| C | 0.315001  | 2.532750  | 1.426220  |
| C | 2.357350  | 3.590520  | 0.250910  |
| C | 0.431501  | 2.936320  | -1.133310 |
| C | 2.268280  | 0.345828  | -0.807776 |
| O | 1.756630  | -0.585088 | 2.049590  |
| O | -0.481347 | 3.398400  | 1.744510  |
| H | 0.190503  | 1.245290  | 3.091360  |
| H | 2.365800  | 0.791558  | -1.797020 |
| O | 2.706830  | -0.915168 | -0.678851 |
| C | 3.159940  | -1.556660 | -1.889470 |
| H | 3.944480  | -0.940308 | -2.348000 |
| C | 3.684210  | -2.930410 | -1.519120 |
| H | 2.318940  | -1.626640 | -2.591080 |
| H | 4.033070  | -3.448860 | -2.418240 |
| H | 4.518180  | -2.849820 | -0.816150 |
| H | 2.897940  | -3.530440 | -1.052690 |
| C | 1.820060  | 4.924580  | 0.752331  |
| C | 3.514220  | 3.191680  | 1.188030  |
| C | 2.804260  | 3.654360  | -1.221860 |
| C | 1.548120  | 3.451280  | -2.095500 |
| H | -0.115625 | 3.829840  | -0.808245 |
| C | -0.606256 | 1.995730  | -1.798630 |
| H | 1.222550  | 4.387490  | -2.563230 |
| O | 1.795140  | 2.490090  | -3.144240 |
| H | 3.489620  | 2.823590  | -1.420230 |
| H | 3.350330  | 4.575260  | -1.447730 |
| H | 4.302840  | 3.949610  | 1.138840  |
| H | 3.185280  | 3.129060  | 2.230920  |

|   |           |           |           |
|---|-----------|-----------|-----------|
| H | 3.945760  | 2.226950  | 0.908478  |
| C | 1.768820  | 6.087910  | 0.097040  |
| H | 2.382340  | 2.895290  | -3.795030 |
| C | -1.600540 | 1.395660  | -0.782155 |
| C | -1.342520 | 2.765740  | -2.913100 |
| H | -0.069611 | 1.164170  | -2.270100 |
| H | -2.021320 | 2.112070  | -3.467890 |
| H | -1.938760 | 3.584950  | -2.490880 |
| H | -0.641190 | 3.186880  | -3.637570 |
| H | -1.047960 | 0.865883  | 0.000493  |
| H | -2.149960 | 2.203640  | -0.281041 |
| C | -2.604390 | 0.386534  | -1.381860 |
| C | -3.493380 | -0.219272 | -0.326865 |
| H | -3.239920 | 0.894403  | -2.119220 |
| H | -2.054170 | -0.386806 | -1.929790 |
| C | -3.585180 | -1.503230 | 0.061892  |
| C | -4.541580 | -1.913020 | 1.158630  |
| C | -2.784140 | -2.643810 | -0.519851 |
| H | -2.193610 | -3.136790 | 0.263733  |
| H | -3.451470 | -3.410220 | -0.936764 |
| H | -2.097360 | -2.332180 | -1.309050 |
| H | -5.265430 | -2.654670 | 0.794051  |
| H | -4.004640 | -2.384770 | 1.992770  |
| H | -5.099700 | -1.058880 | 1.553090  |
| H | -4.131130 | 0.501225  | 0.189110  |
| H | 1.396370  | 6.980830  | 0.590139  |
| H | 2.079230  | 6.207660  | -0.936987 |
| H | 1.477700  | 4.915220  | 1.784420  |

### Cartesian Coordinates of Conformers (>2% population) of 1c

Conf 14

|   |           |           |           |
|---|-----------|-----------|-----------|
| C | 2.046990  | 1.489720  | 2.866520  |
| C | 1.961950  | 0.746950  | 1.540900  |
| C | 2.240880  | -0.688072 | 1.760450  |
| N | 2.630660  | -0.796511 | 3.102950  |
| C | 2.638900  | 0.401328  | 3.785730  |
| C | 0.607143  | 1.921520  | 3.457540  |
| C | 2.852210  | 2.830220  | 2.955990  |
| C | 1.786830  | 1.144010  | 0.264169  |
| O | 2.197950  | -1.628940 | 0.983458  |
| O | 3.039110  | 0.526198  | 4.935590  |
| H | 2.949890  | -1.666090 | 3.512710  |
| H | 1.796050  | 0.383601  | -0.517142 |
| O | 1.634100  | 2.416380  | -0.127279 |
| C | 1.446160  | 2.628550  | -1.546580 |
| H | 0.505932  | 2.151210  | -1.849680 |
| C | 1.413260  | 4.122680  | -1.800020 |
| H | 2.271820  | 2.149380  | -2.087020 |
| H | 1.262390  | 4.311020  | -2.867780 |
| H | 0.596212  | 4.593390  | -1.246210 |
| H | 2.353900  | 4.590450  | -1.495700 |
| C | -0.191036 | 2.647510  | 2.386740  |
| C | -0.250832 | 0.721390  | 3.911780  |
| C | 1.005900  | 2.828250  | 4.636090  |
| C | 2.361810  | 3.492740  | 4.296890  |
| H | 2.453750  | 3.445070  | 2.140310  |
| C | 4.398920  | 2.820940  | 2.819520  |
| H | 2.250420  | 4.569100  | 4.142520  |
| O | 3.276980  | 3.383980  | 5.381090  |
| H | 1.147220  | 2.217470  | 5.531600  |
| H | 0.224998  | 3.553590  | 4.878780  |
| H | -1.199480 | 1.085050  | 4.319070  |
| H | -0.485771 | 0.052330  | 3.076450  |
| H | 0.245513  | 0.140117  | 4.694980  |
| C | -0.607469 | 3.916540  | 2.390760  |
| H | 3.379790  | 2.435300  | 5.569880  |
| C | 4.915040  | 2.047380  | 1.587750  |
| C | 4.901910  | 4.277760  | 2.806450  |
| H | 4.818450  | 2.341190  | 3.710440  |
| H | 5.993910  | 4.320240  | 2.780770  |
| H | 4.525020  | 4.813490  | 1.924640  |
| H | 4.582430  | 4.813030  | 3.702860  |
| H | 4.530030  | 1.022340  | 1.607180  |
| H | 4.515100  | 2.506200  | 0.672985  |
| C | 6.453680  | 1.951750  | 1.460520  |
| C | 7.099780  | 1.208600  | 2.601390  |
| H | 6.665530  | 1.412200  | 0.524738  |
| H | 6.890190  | 2.946290  | 1.334920  |
| C | 8.147540  | 1.569560  | 3.362610  |
| C | 8.651080  | 0.666150  | 4.464960  |
| C | 8.921100  | 2.858150  | 3.215440  |
| H | 8.536830  | 3.507270  | 2.426300  |
| H | 8.909070  | 3.424360  | 4.156210  |
| H | 9.975860  | 2.648850  | 2.991450  |
| H | 9.702440  | 0.392545  | 4.301860  |

|   |           |           |          |
|---|-----------|-----------|----------|
| H | 8.607110  | 1.172870  | 5.438470 |
| H | 8.066430  | -0.255605 | 4.535890 |
| H | 6.642380  | 0.240964  | 2.820070 |
| H | -1.213730 | 4.301130  | 1.575670 |
| H | -0.370921 | 4.618460  | 3.184540 |
| H | -0.483847 | 2.018840  | 1.547540 |

Conf 182

|   |           |           |           |
|---|-----------|-----------|-----------|
| C | 2.007720  | 1.596950  | 2.987660  |
| C | 2.247010  | 0.819167  | 1.701640  |
| C | 2.610270  | -0.575667 | 2.029300  |
| N | 2.751590  | -0.611442 | 3.424570  |
| C | 2.519510  | 0.596859  | 4.045060  |
| C | 0.446700  | 1.889130  | 3.282100  |
| C | 2.644580  | 3.016110  | 3.169830  |
| C | 2.285510  | 1.168150  | 0.399797  |
| O | 2.797330  | -1.536020 | 1.299440  |
| O | 2.686150  | 0.790649  | 5.242450  |
| H | 3.069750  | -1.434180 | 3.922390  |
| H | 2.518040  | 0.395510  | -0.333383 |
| O | 2.089980  | 2.409470  | -0.065578 |
| C | 2.181420  | 2.572750  | -1.500910 |
| H | 3.155320  | 2.195880  | -1.836590 |
| C | 2.019180  | 4.045790  | -1.819570 |
| H | 1.392650  | 1.973030  | -1.972000 |
| H | 1.051230  | 4.415480  | -1.469890 |
| H | 2.808350  | 4.636410  | -1.345670 |
| H | 2.077320  | 4.195990  | -2.902340 |
| C | -0.200261 | 2.503870  | 2.051500  |
| C | -0.360029 | 0.616774  | 3.618250  |
| C | 0.523192  | 2.858730  | 4.475580  |
| C | 1.847350  | 3.652490  | 4.368540  |
| H | 2.349590  | 3.568460  | 2.269960  |
| C | 4.182440  | 3.165570  | 3.323300  |
| H | 1.662990  | 4.708260  | 4.153940  |
| O | 2.547620  | 3.660240  | 5.607440  |
| H | 0.549828  | 2.286490  | 5.406650  |
| H | -0.356540 | 3.504550  | 4.537080  |
| H | -1.399570 | 0.888955  | 3.826360  |
| H | -0.365982 | -0.091847 | 2.782570  |
| H | 0.033438  | 0.108000  | 4.503710  |
| C | -0.734024 | 3.721630  | 1.925160  |
| H | 2.699640  | 2.730640  | 5.850750  |
| C | 4.996770  | 2.416460  | 2.246880  |
| C | 4.532940  | 4.666730  | 3.344950  |
| H | 4.467100  | 2.750690  | 4.297820  |
| H | 5.599360  | 4.825470  | 3.526730  |
| H | 4.284210  | 5.138230  | 2.384660  |
| H | 3.992910  | 5.186460  | 4.138880  |
| H | 4.718950  | 1.358440  | 2.238120  |
| H | 4.740870  | 2.807110  | 1.251500  |
| C | 6.528800  | 2.478360  | 2.438410  |
| C | 7.262750  | 1.673050  | 1.397760  |
| H | 6.867600  | 3.520040  | 2.370550  |
| H | 6.776770  | 2.140510  | 3.450720  |
| C | 8.013420  | 0.569290  | 1.560550  |

|   |           |           |           |
|---|-----------|-----------|-----------|
| C | 8.666790  | -0.105164 | 0.375921  |
| C | 8.287700  | -0.101902 | 2.885410  |
| H | 9.366650  | -0.126875 | 3.089140  |
| H | 7.799160  | 0.388611  | 3.729360  |
| H | 7.951810  | -1.147230 | 2.862140  |
| H | 9.757960  | -0.143884 | 0.496680  |
| H | 8.326050  | -1.144760 | 0.277690  |
| H | 8.447420  | 0.414498  | -0.561506 |
| H | 7.147820  | 2.045740  | 0.377510  |
| H | -1.207970 | 4.022710  | 0.995357  |
| H | -0.725266 | 4.461310  | 2.719890  |
| H | -0.262349 | 1.830300  | 1.198510  |

Conf 27

|   |           |           |           |
|---|-----------|-----------|-----------|
| C | 1.965930  | 1.645260  | 3.235370  |
| C | 2.224770  | 0.628504  | 2.132990  |
| C | 2.477260  | -0.697686 | 2.734420  |
| N | 2.534270  | -0.480354 | 4.119080  |
| C | 2.347190  | 0.833478  | 4.490750  |
| C | 0.415186  | 2.076990  | 3.364310  |
| C | 2.688330  | 3.034470  | 3.197470  |
| C | 2.360670  | 0.724904  | 0.794782  |
| O | 2.646380  | -1.785630 | 2.206950  |
| O | 2.456630  | 1.237520  | 5.641220  |
| H | 2.767600  | -1.211770 | 4.779840  |
| H | 2.584300  | -0.182868 | 0.233931  |
| O | 2.272450  | 1.864880  | 0.096713  |
| C | 2.473660  | 1.752760  | -1.332610 |
| H | 1.688220  | 1.108190  | -1.746550 |
| C | 2.415390  | 3.145650  | -1.927570 |
| H | 3.446810  | 1.280710  | -1.514580 |
| H | 2.558460  | 3.088390  | -3.011360 |
| H | 1.446850  | 3.613440  | -1.730060 |
| H | 3.200370  | 3.781380  | -1.508240 |
| C | -0.117043 | 2.487810  | 2.000930  |
| C | -0.495759 | 0.938536  | 3.871010  |
| C | 0.491732  | 3.246110  | 4.363240  |
| C | 1.871520  | 3.928440  | 4.202790  |
| H | 2.482560  | 3.424970  | 2.193920  |
| C | 4.221950  | 3.119230  | 3.423080  |
| H | 1.772700  | 4.934200  | 3.786360  |
| O | 2.500470  | 4.127770  | 5.463700  |
| H | 0.426907  | 2.856830  | 5.382680  |
| H | -0.343385 | 3.941580  | 4.246130  |
| H | -1.523930 | 1.304530  | 3.954470  |
| H | -0.503873 | 0.088213  | 3.180040  |
| H | -0.189347 | 0.581688  | 4.859190  |
| C | -0.555125 | 3.689970  | 1.617930  |
| H | 2.573520  | 3.253290  | 5.883560  |
| C | 5.039390  | 2.144770  | 2.548790  |
| C | 4.675590  | 4.576390  | 3.204050  |
| H | 4.425600  | 2.869080  | 4.471470  |
| H | 5.739200  | 4.699790  | 3.426020  |
| H | 4.514260  | 4.881500  | 2.161340  |
| H | 4.131150  | 5.261790  | 3.856530  |
| H | 4.697730  | 1.119240  | 2.722880  |



|   |           |           |           |
|---|-----------|-----------|-----------|
| H | 4.854310  | 2.350490  | 1.485560  |
| C | 6.562170  | 2.170180  | 2.806140  |
| C | 7.273380  | 1.045070  | 2.100300  |
| H | 6.981480  | 3.136640  | 2.516570  |
| H | 6.731510  | 2.073430  | 3.889850  |
| C | 8.236460  | 1.112630  | 1.163920  |
| C | 8.830740  | -0.145590 | 0.572814  |
| C | 8.826160  | 2.392100  | 0.619030  |
| H | 8.721230  | 2.429520  | -0.473642 |
| H | 8.366200  | 3.292030  | 1.031520  |
| H | 9.903390  | 2.439640  | 0.828314  |
| H | 8.696500  | -0.171712 | -0.517287 |
| H | 9.913220  | -0.192512 | 0.754077  |
| H | 8.376800  | -1.047680 | 0.993109  |
| H | 6.944400  | 0.047311  | 2.398360  |
| H | -0.953580 | 3.839580  | 0.618622  |
| H | -0.538122 | 4.563260  | 2.262780  |
| H | -0.178676 | 1.671490  | 1.283320  |

Conf 342

|   |           |           |           |
|---|-----------|-----------|-----------|
| C | 1.823830  | 1.866600  | 3.403160  |
| C | 2.129370  | 0.790528  | 2.375120  |
| C | 2.299500  | -0.508467 | 3.055130  |
| N | 2.260850  | -0.222786 | 4.430400  |
| C | 2.079200  | 1.110180  | 4.722800  |
| C | 0.275130  | 2.330170  | 3.381370  |
| C | 2.601240  | 3.226330  | 3.357510  |
| C | 2.325710  | 0.822433  | 1.042200  |
| O | 2.473930  | -1.626560 | 2.597470  |
| O | 2.100400  | 1.570480  | 5.857620  |
| H | 2.415170  | -0.927468 | 5.141440  |
| H | 2.532570  | -0.115527 | 0.526782  |
| O | 2.337580  | 1.938240  | 0.299548  |
| C | 2.445390  | 1.750630  | -1.130650 |
| H | 1.518470  | 1.286880  | -1.489550 |
| C | 2.669020  | 3.106050  | -1.771820 |
| H | 3.280910  | 1.069710  | -1.334990 |
| H | 2.745530  | 2.990840  | -2.857740 |
| H | 1.836610  | 3.782120  | -1.556080 |
| H | 3.593310  | 3.563040  | -1.406710 |
| C | -0.123091 | 2.724250  | 1.969940  |
| C | -0.681481 | 1.274520  | 3.956120  |
| C | 0.302976  | 3.616550  | 4.254670  |
| C | 1.735330  | 4.206360  | 4.227550  |
| H | 2.521100  | 3.567380  | 2.318470  |
| C | 4.110890  | 3.262880  | 3.722140  |
| H | 1.745390  | 5.198930  | 3.769840  |
| O | 2.233640  | 4.419440  | 5.542830  |
| H | 0.058648  | 3.368380  | 5.291440  |
| H | -0.449372 | 4.335110  | 3.915060  |
| H | -1.706490 | 1.657590  | 3.949220  |
| H | -0.667862 | 0.346104  | 3.375670  |
| H | -0.433208 | 1.037120  | 4.993710  |
| C | -1.139540 | 2.239480  | 1.250480  |
| H | 2.226260  | 3.555500  | 5.991680  |
| C | 4.960440  | 2.228530  | 2.953150  |

|   |           |           |          |
|---|-----------|-----------|----------|
| C | 4.643160  | 4.692860  | 3.502090 |
| H | 4.207610  | 3.040440  | 4.791700 |
| H | 5.689240  | 4.778260  | 3.808670 |
| H | 4.583140  | 4.972550  | 2.441530 |
| H | 4.077620  | 5.419800  | 4.088200 |
| H | 4.561680  | 1.223690  | 3.125010 |
| H | 4.877470  | 2.405920  | 1.872010 |
| C | 6.454320  | 2.201880  | 3.344860 |
| C | 7.176360  | 1.026200  | 2.739550 |
| H | 6.938750  | 3.140480  | 3.065310 |
| H | 6.523030  | 2.134840  | 4.441810 |
| C | 8.220450  | 1.024080  | 1.891840 |
| C | 8.810180  | -0.275863 | 1.393860 |
| C | 8.909750  | 2.260030  | 1.363780 |
| H | 9.965610  | 2.271350  | 1.666310 |
| H | 8.902230  | 2.265120  | 0.265497 |
| H | 8.454440  | 3.190940  | 1.706870 |
| H | 8.771040  | -0.332979 | 0.297413 |
| H | 9.869600  | -0.359742 | 1.672150 |
| H | 8.283010  | -1.144590 | 1.798650 |
| H | 6.779820  | 0.052954  | 3.036270 |
| H | -1.356230 | 2.637630  | 0.263231 |
| H | -1.791470 | 1.446730  | 1.602910 |
| H | 0.472268  | 3.520250  | 1.527420 |

Conf 34

|   |           |           |           |
|---|-----------|-----------|-----------|
| C | 2.058960  | 1.754220  | 3.145760  |
| C | 2.283710  | 0.875414  | 1.927040  |
| C | 2.656100  | -0.485491 | 2.361420  |
| N | 2.811790  | -0.407206 | 3.755820  |
| C | 2.575860  | 0.844161  | 4.278550  |
| C | 0.493288  | 2.054580  | 3.416860  |
| C | 2.708630  | 3.178520  | 3.207140  |
| C | 2.264750  | 1.120150  | 0.602117  |
| O | 2.838330  | -1.503060 | 1.712680  |
| O | 2.738920  | 1.135370  | 5.457130  |
| H | 3.129860  | -1.188450 | 4.316500  |
| H | 2.458470  | 0.292643  | -0.080489 |
| O | 2.075750  | 2.328490  | 0.052523  |
| C | 1.951040  | 2.361110  | -1.387880 |
| H | 1.003690  | 1.882090  | -1.663870 |
| C | 1.988790  | 3.809080  | -1.835530 |
| H | 2.775810  | 1.785920  | -1.826800 |
| H | 1.887150  | 3.860150  | -2.924280 |
| H | 1.169040  | 4.377810  | -1.387140 |
| H | 2.934900  | 4.280410  | -1.554050 |
| C | -0.149550 | 2.606770  | 2.156760  |
| C | -0.274914 | 0.833919  | 3.945670  |
| C | 0.553459  | 3.196320  | 4.470600  |
| C | 1.911900  | 3.928540  | 4.334480  |
| H | 2.442040  | 3.655950  | 2.256770  |
| C | 4.248590  | 3.318660  | 3.359430  |
| H | 1.770800  | 4.972420  | 4.042630  |
| O | 2.589650  | 3.999960  | 5.583190  |
| H | 0.494947  | 2.776340  | 5.478770  |
| H | -0.297996 | 3.874920  | 4.360030  |

|   |           |           |           |
|---|-----------|-----------|-----------|
| H | -1.316030 | 1.106250  | 4.144030  |
| H | -0.276715 | 0.005725  | 3.229350  |
| H | 0.149437  | 0.475584  | 4.887000  |
| C | -1.222350 | 2.128940  | 1.519100  |
| H | 2.722500  | 3.084070  | 5.885680  |
| C | 5.053170  | 2.485620  | 2.338530  |
| C | 4.621480  | 4.812310  | 3.280080  |
| H | 4.522310  | 2.967300  | 4.361430  |
| H | 5.691120  | 4.965430  | 3.446530  |
| H | 4.376480  | 5.223410  | 2.291370  |
| H | 4.093720  | 5.391860  | 4.040070  |
| H | 4.758520  | 1.434060  | 2.399790  |
| H | 4.804800  | 2.811410  | 1.318160  |
| C | 6.585530  | 2.536360  | 2.530230  |
| C | 7.308110  | 1.646940  | 1.551940  |
| H | 6.941580  | 3.564980  | 2.389510  |
| H | 6.825880  | 2.267370  | 3.564780  |
| C | 8.047890  | 0.550984  | 1.796450  |
| C | 8.690120  | -0.218493 | 0.664826  |
| C | 8.319600  | -0.020712 | 3.167700  |
| H | 7.837730  | 0.536482  | 3.973220  |
| H | 7.974430  | -1.061740 | 3.224040  |
| H | 9.398830  | -0.039898 | 3.370680  |
| H | 9.781110  | -0.260888 | 0.786005  |
| H | 8.336920  | -1.258400 | 0.646084  |
| H | 8.473940  | 0.231456  | -0.308672 |
| H | 7.193720  | 1.942470  | 0.506729  |
| H | -1.621400 | 2.642500  | 0.648940  |
| H | -1.744970 | 1.229470  | 1.828120  |
| H | 0.302970  | 3.516800  | 1.768130  |

Conf 16

|   |           |           |           |
|---|-----------|-----------|-----------|
| C | 2.030140  | 1.544970  | 2.884070  |
| C | 1.909210  | 0.841732  | 1.539470  |
| C | 2.195530  | -0.597966 | 1.708020  |
| N | 2.617350  | -0.747454 | 3.036960  |
| C | 2.641740  | 0.428769  | 3.755740  |
| C | 0.607655  | 1.963830  | 3.524090  |
| C | 2.843650  | 2.879200  | 2.993120  |
| C | 1.687170  | 1.272420  | 0.280661  |
| O | 2.136020  | -1.514890 | 0.903456  |
| O | 3.068480  | 0.518646  | 4.899390  |
| H | 2.946410  | -1.628930 | 3.411950  |
| H | 1.674130  | 0.532537  | -0.520317 |
| O | 1.487840  | 2.549670  | -0.069014 |
| C | 1.332180  | 2.823190  | -1.480990 |
| H | 0.743136  | 3.742400  | -1.518700 |
| C | 2.674140  | 2.997960  | -2.175550 |
| H | 0.743562  | 2.017090  | -1.935960 |
| H | 2.513230  | 3.252830  | -3.228720 |
| H | 3.249410  | 3.803430  | -1.710090 |
| H | 3.267700  | 2.079070  | -2.136000 |
| C | -0.214085 | 2.723940  | 2.495590  |
| C | -0.242845 | 0.753763  | 3.965270  |
| C | 1.039120  | 2.835000  | 4.717900  |
| C | 2.388460  | 3.504920  | 4.364080  |

|   |           |           |          |
|---|-----------|-----------|----------|
| H | 2.428990  | 3.518970  | 2.204950 |
| C | 4.386800  | 2.867010  | 2.821650 |
| H | 2.277360  | 4.585590  | 4.243090 |
| O | 3.329740  | 3.362670  | 5.421840 |
| H | 1.200440  | 2.198520  | 5.591870 |
| H | 0.266915  | 3.555380  | 5.000040 |
| H | -1.179710 | 1.108340  | 4.406500 |
| H | -0.501065 | 0.109656  | 3.117300 |
| H | 0.270679  | 0.148818  | 4.718900 |
| C | -0.610392 | 3.998680  | 2.539530 |
| H | 3.432510  | 2.408700  | 5.581800 |
| C | 4.873370  | 2.122280  | 1.560640 |
| C | 4.896210  | 4.321650  | 2.833470 |
| H | 4.823480  | 2.363710  | 3.690990 |
| H | 5.987580  | 4.360700  | 2.783680 |
| H | 4.501530  | 4.881030  | 1.974390 |
| H | 4.599820  | 4.835660  | 3.750060 |
| H | 4.479180  | 1.100610  | 1.558940 |
| H | 4.462050  | 2.608980  | 0.665826 |
| C | 6.408640  | 2.016840  | 1.403620 |
| C | 7.067550  | 1.237100  | 2.512280 |
| H | 6.599420  | 1.501460  | 0.449800 |
| H | 6.852090  | 3.010630  | 1.297870 |
| C | 8.133790  | 1.566650  | 3.261960 |
| C | 8.647840  | 0.629793  | 4.331010 |
| C | 8.919220  | 2.850030  | 3.132890 |
| H | 9.967200  | 2.634890  | 2.884010 |
| H | 8.528060  | 3.523320  | 2.367740 |
| H | 8.931010  | 3.392170  | 4.087730 |
| H | 9.692820  | 0.349309  | 4.140910 |
| H | 8.627860  | 1.111800  | 5.317750 |
| H | 8.054400  | -0.287185 | 4.389640 |
| H | 6.603110  | 0.269335  | 2.714850 |
| H | -1.233960 | 4.410270  | 1.751170 |
| H | -0.338845 | 4.679340  | 3.340680 |
| H | -0.541232 | 2.118770  | 1.652010 |

Conf 22

|   |          |           |           |
|---|----------|-----------|-----------|
| C | 2.063850 | 1.731970  | 3.112350  |
| C | 2.322520 | 0.904111  | 1.861660  |
| C | 2.670130 | -0.478774 | 2.248540  |
| N | 2.780990 | -0.463831 | 3.647020  |
| C | 2.545730 | 0.768489  | 4.216930  |
| C | 0.500976 | 2.049700  | 3.364730  |
| C | 2.711290 | 3.151430  | 3.253400  |
| C | 2.393740 | 1.203440  | 0.548647  |
| O | 2.866460 | -1.466960 | 1.558940  |
| O | 2.689320 | 1.005970  | 5.409450  |
| H | 3.083580 | -1.269150 | 4.181630  |
| H | 2.641950 | 0.402471  | -0.148402 |
| O | 2.227320 | 2.428190  | 0.032682  |
| C | 2.318670 | 2.545800  | -1.406110 |
| H | 3.129390 | 1.899850  | -1.764690 |
| C | 0.997761 | 2.217270  | -2.085730 |
| H | 2.605750 | 3.585410  | -1.578550 |
| H | 1.092740 | 2.364980  | -3.166960 |

|   |           |           |           |
|---|-----------|-----------|-----------|
| H | 0.705992  | 1.176530  | -1.911430 |
| H | 0.200197  | 2.869120  | -1.717870 |
| C | -0.114127 | 2.624940  | 2.099340  |
| C | -0.325390 | 0.798658  | 3.731240  |
| C | 0.563789  | 3.062430  | 4.522500  |
| C | 1.896860  | 3.840330  | 4.410930  |
| H | 2.439220  | 3.671720  | 2.327550  |
| C | 4.247230  | 3.293330  | 3.431610  |
| H | 1.726220  | 4.888450  | 4.152090  |
| O | 2.573030  | 3.890340  | 5.662180  |
| H | 0.567983  | 2.525030  | 5.474440  |
| H | -0.311118 | 3.717380  | 4.543140  |
| H | -1.366180 | 1.088100  | 3.907480  |
| H | -0.321212 | 0.059290  | 2.922620  |
| H | 0.044778  | 0.319749  | 4.643000  |
| C | -0.623737 | 3.845600  | 1.914600  |
| H | 2.711320  | 2.969680  | 5.944290  |
| C | 5.075810  | 2.496570  | 2.401230  |
| C | 4.611110  | 4.791210  | 3.402520  |
| H | 4.508740  | 2.913820  | 4.426830  |
| H | 5.675400  | 4.947680  | 3.598320  |
| H | 4.384730  | 5.227430  | 2.420290  |
| H | 4.061200  | 5.345590  | 4.165660  |
| H | 4.787570  | 1.441630  | 2.426390  |
| H | 4.844900  | 2.851880  | 1.386760  |
| C | 6.604100  | 2.550880  | 2.622930  |
| C | 7.350920  | 1.698530  | 1.629970  |
| H | 6.955380  | 3.585700  | 2.522110  |
| H | 6.827330  | 2.250130  | 3.652580  |
| C | 8.080320  | 0.590553  | 1.850670  |
| C | 8.751580  | -0.135898 | 0.707538  |
| C | 8.311780  | -0.036243 | 3.205130  |
| H | 7.810300  | 0.491559  | 4.018410  |
| H | 7.960370  | -1.076710 | 3.210930  |
| H | 9.384910  | -0.069628 | 3.436630  |
| H | 9.838750  | -0.186549 | 0.856694  |
| H | 8.396870  | -1.173150 | 0.638046  |
| H | 8.563360  | 0.352850  | -0.253000 |
| H | 7.266100  | 2.035690  | 0.594563  |
| H | -1.074490 | 4.118290  | 0.964709  |
| H | -0.616350 | 4.616090  | 2.679500  |
| H | -0.171438 | 1.918850  | 1.272860  |

Conf 323

|   |          |           |          |
|---|----------|-----------|----------|
| C | 1.878220 | 1.815650  | 3.293890 |
| C | 2.161720 | 0.876433  | 2.130220 |
| C | 2.487630 | -0.467855 | 2.649370 |
| N | 2.562870 | -0.327116 | 4.043200 |
| C | 2.323680 | 0.953155  | 4.493130 |
| C | 0.311973 | 2.164190  | 3.475590 |
| C | 2.533550 | 3.238110  | 3.323070 |
| C | 2.269040 | 1.055340  | 0.797880 |
| O | 2.693150 | -1.515580 | 2.057180 |
| O | 2.438950 | 1.296710  | 5.662680 |
| H | 2.845080 | -1.082560 | 4.656040 |
| H | 2.528200 | 0.193122  | 0.182705 |

|   |           |           |           |
|---|-----------|-----------|-----------|
| O | 2.126120  | 2.229410  | 0.169306  |
| C | 2.255880  | 2.215940  | -1.271320 |
| H | 3.070490  | 1.535680  | -1.548370 |
| C | 0.950528  | 1.834770  | -1.953490 |
| H | 2.555680  | 3.234080  | -1.529100 |
| H | 1.074750  | 1.883710  | -3.040710 |
| H | 0.646003  | 0.815685  | -1.693930 |
| H | 0.148914  | 2.521660  | -1.667210 |
| C | -0.265811 | 2.626040  | 2.147690  |
| C | -0.533711 | 0.956390  | 3.931970  |
| C | 0.353650  | 3.277240  | 4.538280  |
| C | 1.695610  | 4.033800  | 4.391900  |
| H | 2.289590  | 3.674090  | 2.347200  |
| C | 4.065610  | 3.386370  | 3.527910  |
| H | 1.540470  | 5.055240  | 4.035160  |
| O | 2.339940  | 4.192700  | 5.650840  |
| H | 0.328981  | 2.828330  | 5.534720  |
| H | -0.515980 | 3.936640  | 4.476630  |
| H | -1.576250 | 1.266720  | 4.054080  |
| H | -0.515034 | 0.146806  | 3.193880  |
| H | -0.190843 | 0.559847  | 4.892630  |
| C | -0.760246 | 3.828020  | 1.840030  |
| H | 2.463430  | 3.300500  | 6.018370  |
| C | 4.913610  | 2.494520  | 2.596020  |
| C | 4.442560  | 4.873240  | 3.372890  |
| H | 4.298360  | 3.097150  | 4.559930  |
| H | 5.502790  | 5.040500  | 3.581400  |
| H | 4.244910  | 5.219900  | 2.349620  |
| H | 3.878010  | 5.497830  | 4.068090  |
| H | 4.711980  | 2.757940  | 1.547830  |
| H | 4.615840  | 1.447970  | 2.708670  |
| C | 6.436080  | 2.559200  | 2.852310  |
| C | 7.200960  | 1.615890  | 1.960470  |
| H | 6.798730  | 3.578460  | 2.667870  |
| H | 6.630020  | 2.351410  | 3.910450  |
| C | 7.915020  | 0.528015  | 2.299530  |
| C | 8.609180  | -0.303125 | 1.244800  |
| C | 8.106340  | 0.025048  | 3.710720  |
| H | 7.746580  | -1.008630 | 3.801150  |
| H | 9.172820  | 0.006710  | 3.972620  |
| H | 7.588230  | 0.627103  | 4.459450  |
| H | 9.691600  | -0.347353 | 1.426860  |
| H | 8.247010  | -1.340030 | 1.259610  |
| H | 8.450370  | 0.098137  | 0.239457  |
| H | 7.145640  | 1.858470  | 0.896962  |
| H | -1.184310 | 4.016240  | 0.857910  |
| H | -0.765889 | 4.664560  | 2.532080  |
| H | -0.307964 | 1.848280  | 1.387270  |

Conf 15

|   |          |           |          |
|---|----------|-----------|----------|
| C | 1.940900 | 1.667620  | 3.237540 |
| C | 2.178110 | 0.676934  | 2.106490 |
| C | 2.477080 | -0.654726 | 2.671540 |
| N | 2.573570 | -0.465137 | 4.058260 |
| C | 2.374100 | 0.836819  | 4.463340 |
| C | 0.389773 | 2.075980  | 3.424990 |

|   |           |           |           |
|---|-----------|-----------|-----------|
| C | 2.645520  | 3.066230  | 3.206440  |
| C | 2.251770  | 0.797058  | 0.764881  |
| O | 2.652050  | -1.728240 | 2.116350  |
| O | 2.511760  | 1.219260  | 5.618230  |
| H | 2.841650  | -1.205370 | 4.695560  |
| H | 2.468920  | -0.097614 | 0.180450  |
| O | 2.085560  | 1.939380  | 0.086978  |
| C | 2.283630  | 1.884170  | -1.345360 |
| H | 1.664220  | 2.693130  | -1.739580 |
| C | 3.745330  | 2.072770  | -1.720930 |
| H | 1.888890  | 0.932325  | -1.721380 |
| H | 3.848030  | 2.070020  | -2.811620 |
| H | 4.122830  | 3.026730  | -1.341760 |
| H | 4.369230  | 1.268830  | -1.318040 |
| C | -0.192316 | 2.506130  | 2.088190  |
| C | -0.488434 | 0.915462  | 3.938980  |
| C | 0.483219  | 3.226740  | 4.443410  |
| C | 1.847800  | 3.930870  | 4.252590  |
| H | 2.406990  | 3.473760  | 2.216890  |
| C | 4.183590  | 3.165090  | 3.393110  |
| H | 1.722900  | 4.942490  | 3.857920  |
| O | 2.512780  | 4.116260  | 5.497140  |
| H | 0.456582  | 2.817310  | 5.456620  |
| H | -0.364359 | 3.912660  | 4.366340  |
| H | -1.518520 | 1.264630  | 4.061910  |
| H | -0.506541 | 0.077921  | 3.232760  |
| H | -0.145454 | 0.545267  | 4.910070  |
| C | -0.645130 | 3.713220  | 1.739130  |
| H | 2.608460  | 3.235640  | 5.899160  |
| C | 4.991120  | 2.211570  | 2.487350  |
| C | 4.615290  | 4.630120  | 3.182480  |
| H | 4.416120  | 2.903850  | 4.432630  |
| H | 5.683000  | 4.762790  | 3.377880  |
| H | 4.422700  | 4.947920  | 2.148890  |
| H | 4.080790  | 5.300160  | 3.858720  |
| H | 4.658040  | 1.180980  | 2.647390  |
| H | 4.787870  | 2.435710  | 1.431450  |
| C | 6.517410  | 2.241350  | 2.722100  |
| C | 7.226220  | 1.137420  | 1.981250  |
| H | 6.926320  | 3.216940  | 2.448750  |
| H | 6.702760  | 2.121520  | 3.800960  |
| C | 8.196930  | 1.231380  | 1.055010  |
| C | 8.789950  | -0.009547 | 0.427089  |
| C | 8.798700  | 2.525090  | 0.559199  |
| H | 8.706540  | 2.599220  | -0.532732 |
| H | 8.338670  | 3.413280  | 0.996342  |
| H | 9.873650  | 2.560020  | 0.782164  |
| H | 9.870400  | -0.068627 | 0.616658  |
| H | 8.327420  | -0.922781 | 0.812537  |
| H | 8.666030  | 0.001918  | -0.664490 |
| H | 6.890860  | 0.131808  | 2.243830  |
| H | -1.077480 | 3.877470  | 0.756366  |
| H | -0.607211 | 4.576510  | 2.396550  |
| H | -0.277498 | 1.701300  | 1.360330  |

|   |           |           |           |
|---|-----------|-----------|-----------|
| C | 1.987480  | 1.716560  | 3.206370  |
| C | 2.242220  | 0.752141  | 2.056660  |
| C | 2.432140  | -0.612402 | 2.589660  |
| N | 2.453140  | -0.474210 | 3.985510  |
| C | 2.300720  | 0.823054  | 4.424760  |
| C | 0.451761  | 2.201960  | 3.316510  |
| C | 2.763540  | 3.076150  | 3.266240  |
| C | 2.424450  | 0.916070  | 0.730320  |
| O | 2.580730  | -1.675230 | 2.007050  |
| O | 2.388530  | 1.158710  | 5.598860  |
| H | 2.640990  | -1.248780 | 4.610600  |
| H | 2.638920  | 0.032563  | 0.128298  |
| O | 2.407700  | 2.094660  | 0.095105  |
| C | 2.609350  | 2.064440  | -1.337190 |
| H | 3.380830  | 1.320950  | -1.571510 |
| C | 1.314210  | 1.784730  | -2.084780 |
| H | 3.001610  | 3.054510  | -1.579550 |
| H | 1.497230  | 1.817640  | -3.164280 |
| H | 0.916470  | 0.794576  | -1.839760 |
| H | 0.556313  | 2.534760  | -1.841020 |
| C | -0.022364 | 2.707240  | 1.963620  |
| C | -0.516404 | 1.074570  | 3.733710  |
| C | 0.542552  | 3.311520  | 4.380170  |
| C | 1.952080  | 3.945270  | 4.297240  |
| H | 2.602740  | 3.529240  | 2.280900  |
| C | 4.291990  | 3.088110  | 3.537630  |
| H | 1.905060  | 4.975750  | 3.935840  |
| O | 2.549880  | 4.048730  | 5.584570  |
| H | 0.431133  | 2.870930  | 5.374360  |
| H | -0.261006 | 4.045400  | 4.277310  |
| H | -1.532330 | 1.475170  | 3.807850  |
| H | -0.534889 | 0.263451  | 2.997270  |
| H | -0.253770 | 0.653521  | 4.709120  |
| C | -0.395329 | 3.946490  | 1.633570  |
| H | 2.576350  | 3.149980  | 5.955910  |
| C | 5.097510  | 2.132960  | 2.631400  |
| C | 4.805910  | 4.536420  | 3.413730  |
| H | 4.455670  | 2.772330  | 4.575290  |
| H | 5.866360  | 4.605700  | 3.671370  |
| H | 4.686950  | 4.904820  | 2.385860  |
| H | 4.268530  | 5.205220  | 4.088890  |
| H | 4.714800  | 1.112860  | 2.739660  |
| H | 4.948880  | 2.403330  | 1.577050  |
| C | 6.612650  | 2.087690  | 2.928390  |
| C | 7.302370  | 0.976293  | 2.180750  |
| H | 7.074060  | 3.051950  | 2.702540  |
| H | 6.748790  | 1.926930  | 4.009170  |
| C | 8.288710  | 1.058620  | 1.270150  |
| C | 8.854460  | -0.187273 | 0.627244  |
| C | 8.932750  | 2.343370  | 0.805120  |
| H | 10.006300 | 2.342320  | 1.037360  |
| H | 8.852070  | 2.441380  | -0.285857 |
| H | 8.494800  | 3.236070  | 1.255520  |
| H | 8.744960  | -0.152629 | -0.465388 |
| H | 9.930240  | -0.280754 | 0.829252  |
| H | 8.360990  | -1.093610 | 0.989921  |



|   |           |           |          |
|---|-----------|-----------|----------|
| H | 6.933440  | -0.023497 | 2.419310 |
| H | -0.755919 | 4.167020  | 0.633001 |
| H | -0.359376 | 4.783120  | 2.324600 |
| H | -0.097623 | 1.933140  | 1.202040 |

Conf 341

|   |           |           |           |
|---|-----------|-----------|-----------|
| C | 1.893400  | 1.796880  | 3.383510  |
| C | 2.195140  | 0.794383  | 2.278570  |
| C | 2.662030  | -0.473188 | 2.876820  |
| N | 2.794900  | -0.217469 | 4.249920  |
| C | 2.468820  | 1.070120  | 4.616650  |
| C | 0.313952  | 2.032470  | 3.625920  |
| C | 2.429300  | 3.264210  | 3.271440  |
| C | 2.199680  | 0.868486  | 0.931864  |
| O | 2.928290  | -1.543680 | 2.353450  |
| O | 2.611570  | 1.512940  | 5.749240  |
| H | 3.171140  | -0.896965 | 4.900010  |
| H | 2.489610  | -0.019564 | 0.369409  |
| O | 1.881020  | 1.959310  | 0.223388  |
| C | 2.010500  | 1.865200  | -1.214440 |
| H | 1.687910  | 0.867105  | -1.535290 |
| C | 3.426920  | 2.171740  | -1.676350 |
| H | 1.298970  | 2.597760  | -1.602380 |
| H | 3.733660  | 3.169360  | -1.349170 |
| H | 4.141950  | 1.441960  | -1.283680 |
| H | 3.472800  | 2.138100  | -2.770350 |
| C | -0.367660 | 2.339970  | 2.302400  |
| C | -0.402537 | 0.800764  | 4.218990  |
| C | 0.314705  | 3.225970  | 4.598140  |
| C | 1.578680  | 4.074030  | 4.320230  |
| H | 2.106100  | 3.601170  | 2.279430  |
| C | 3.951470  | 3.547990  | 3.388260  |
| H | 1.320600  | 5.047310  | 3.895000  |
| O | 2.267000  | 4.386060  | 5.526190  |
| H | 0.378191  | 2.856990  | 5.625220  |
| H | -0.609558 | 3.806250  | 4.536380  |
| H | -1.460300 | 1.034770  | 4.375440  |
| H | -0.352031 | -0.060991 | 3.544180  |
| H | 0.019787  | 0.511207  | 5.186200  |
| C | -0.970561 | 3.472850  | 1.932150  |
| H | 2.480900  | 3.539560  | 5.955120  |
| C | 4.833020  | 2.646580  | 2.497850  |
| C | 4.199190  | 5.040410  | 3.091370  |
| H | 4.248450  | 3.369880  | 4.428760  |
| H | 5.250120  | 5.307320  | 3.232380  |
| H | 3.929940  | 5.280760  | 2.054030  |
| H | 3.615590  | 5.677320  | 3.759190  |
| H | 4.617370  | 1.593760  | 2.701830  |
| H | 4.580960  | 2.809480  | 1.440360  |
| C | 6.353500  | 2.841170  | 2.694260  |
| C | 7.162130  | 1.890300  | 1.850320  |
| H | 6.632810  | 3.866880  | 2.421710  |
| H | 6.592850  | 2.730670  | 3.757680  |
| C | 7.961370  | 0.883777  | 2.245910  |
| C | 8.688700  | 0.027941  | 1.234170  |
| C | 8.222830  | 0.501827  | 3.683520  |

|   |           |           |          |
|---|-----------|-----------|----------|
| H | 9.293760  | 0.579153  | 3.914590 |
| H | 7.680090  | 1.119120  | 4.401750 |
| H | 7.942130  | -0.545341 | 3.858680 |
| H | 9.775490  | 0.074391  | 1.387170 |
| H | 8.403750  | -1.028100 | 1.334680 |
| H | 8.477040  | 0.341080  | 0.207472 |
| H | 7.064310  | 2.049010  | 0.774144 |
| H | -1.458630 | 3.547560  | 0.964707 |
| H | -1.005670 | 4.360380  | 2.556590 |
| H | -0.388908 | 1.502230  | 1.607720 |

Conf 18

|   |           |           |           |
|---|-----------|-----------|-----------|
| C | 2.009280  | 1.687300  | 3.131570  |
| C | 2.244610  | 0.847935  | 1.883820  |
| C | 2.670750  | -0.510971 | 2.276780  |
| N | 2.844060  | -0.465834 | 3.668310  |
| C | 2.580350  | 0.765122  | 4.228560  |
| C | 0.446830  | 1.944980  | 3.449510  |
| C | 2.603820  | 3.133500  | 3.220840  |
| C | 2.222990  | 1.119570  | 0.562872  |
| O | 2.880450  | -1.501970 | 1.595070  |
| O | 2.766080  | 1.030270  | 5.409430  |
| H | 3.205420  | -1.247680 | 4.201250  |
| H | 2.463150  | 0.313715  | -0.131367 |
| O | 1.934990  | 2.314300  | 0.030850  |
| C | 2.029460  | 2.428370  | -1.408240 |
| H | 1.341300  | 3.237030  | -1.664980 |
| C | 3.447280  | 2.744840  | -1.859030 |
| H | 1.658230  | 1.501720  | -1.862890 |
| H | 3.468180  | 2.871100  | -2.947010 |
| H | 3.802780  | 3.670760  | -1.397850 |
| H | 4.139190  | 1.938130  | -1.597240 |
| C | -0.249935 | 2.470230  | 2.204730  |
| C | -0.307767 | 0.667706  | 3.875410  |
| C | 0.518834  | 2.981150  | 4.585670  |
| C | 1.810940  | 3.811860  | 4.400040  |
| H | 2.273610  | 3.625200  | 2.298190  |
| C | 4.138730  | 3.338360  | 3.335800  |
| H | 1.584660  | 4.846330  | 4.129180  |
| O | 2.537860  | 3.916120  | 5.619170  |
| H | 0.589071  | 2.462550  | 5.545450  |
| H | -0.381390 | 3.599170  | 4.635180  |
| H | -1.351110 | 0.916537  | 4.093600  |
| H | -0.308163 | -0.086456 | 3.080560  |
| H | 0.122877  | 0.222723  | 4.777760  |
| C | -0.812835 | 3.667520  | 2.021360  |
| H | 2.725200  | 3.008050  | 5.913480  |
| C | 4.962010  | 2.545030  | 2.298810  |
| C | 4.442450  | 4.847620  | 3.254130  |
| H | 4.450560  | 2.997410  | 4.330320  |
| H | 5.506460  | 5.050250  | 3.403830  |
| H | 4.161240  | 5.248600  | 2.271040  |
| H | 3.900680  | 5.400950  | 4.023900  |
| H | 4.707090  | 1.482640  | 2.352570  |
| H | 4.693710  | 2.871400  | 1.284010  |
| C | 6.493250  | 2.650540  | 2.478930  |

|   |           |           |           |
|---|-----------|-----------|-----------|
| C | 7.242580  | 1.804270  | 1.482650  |
| H | 6.809030  | 3.693830  | 2.351580  |
| H | 6.751260  | 2.375620  | 3.507610  |
| C | 8.007420  | 0.720582  | 1.704120  |
| C | 8.675850  | -0.003851 | 0.558063  |
| C | 8.284060  | 0.121015  | 3.062400  |
| H | 9.362200  | 0.121224  | 3.271870  |
| H | 7.784520  | 0.646622  | 3.878290  |
| H | 7.962440  | -0.928661 | 3.090370  |
| H | 8.349750  | -1.051680 | 0.511123  |
| H | 8.454440  | 0.464723  | -0.405464 |
| H | 9.766790  | -0.021377 | 0.685507  |
| H | 7.127900  | 2.123520  | 0.444461  |
| H | -1.318240 | 3.902760  | 1.089180  |
| H | -0.797251 | 4.453880  | 2.769900  |
| H | -0.321248 | 1.745670  | 1.395560  |

Conf 6

|   |           |           |           |
|---|-----------|-----------|-----------|
| C | 2.077630  | 1.578530  | 2.932870  |
| C | 2.137400  | 0.814210  | 1.618250  |
| C | 2.560510  | -0.578653 | 1.875970  |
| N | 2.890620  | -0.628212 | 3.237560  |
| C | 2.735490  | 0.571121  | 3.898830  |
| C | 0.573693  | 1.863670  | 3.447500  |
| C | 2.732460  | 2.997600  | 3.036440  |
| C | 1.981050  | 1.173260  | 0.327970  |
| O | 2.660080  | -1.527410 | 1.113820  |
| O | 3.059780  | 0.752056  | 5.065120  |
| H | 3.286920  | -1.450730 | 3.676090  |
| H | 2.110030  | 0.408475  | -0.438328 |
| O | 1.710720  | 2.416470  | -0.092976 |
| C | 1.561460  | 2.587760  | -1.522240 |
| H | 0.687232  | 2.013500  | -1.853480 |
| C | 1.389250  | 4.067110  | -1.804500 |
| H | 2.452640  | 2.186630  | -2.020560 |
| H | 1.263030  | 4.223790  | -2.880540 |
| H | 0.507692  | 4.460960  | -1.291100 |
| H | 2.265350  | 4.631740  | -1.473030 |
| C | -0.243290 | 2.486640  | 2.327150  |
| C | -0.174784 | 0.585853  | 3.883250  |
| C | 0.816767  | 2.823440  | 4.626870  |
| C | 2.112690  | 3.620210  | 4.342290  |
| H | 2.311780  | 3.557770  | 2.192980  |
| C | 4.276600  | 3.146550  | 2.971410  |
| H | 1.899980  | 4.677930  | 4.166840  |
| O | 2.980970  | 3.616270  | 5.469930  |
| H | 0.973932  | 2.243410  | 5.540000  |
| H | -0.045935 | 3.467300  | 4.816550  |
| H | -1.174660 | 0.852894  | 4.239630  |
| H | -0.298255 | -0.115155 | 3.050230  |
| H | 0.341584  | 0.070368  | 4.698870  |
| C | -0.790073 | 3.704560  | 2.287590  |
| H | 3.165120  | 2.684410  | 5.680280  |
| C | 4.921330  | 2.419610  | 1.771250  |
| C | 4.629540  | 4.647030  | 2.966600  |
| H | 4.693010  | 2.715230  | 3.887810  |

|   |           |           |          |
|---|-----------|-----------|----------|
| H | 5.711780  | 4.803350  | 2.991990 |
| H | 4.245220  | 5.135760  | 2.061170 |
| H | 4.212670  | 5.152700  | 3.839770 |
| H | 4.677620  | 1.353540  | 1.812970 |
| H | 4.483430  | 2.803840  | 0.839192 |
| C | 6.463310  | 2.525870  | 1.663390 |
| C | 7.207160  | 2.003890  | 2.866140 |
| H | 6.769300  | 1.990190  | 0.758835 |
| H | 6.746450  | 3.573580  | 1.497820 |
| C | 7.939700  | 0.880169  | 2.969940 |
| C | 8.621010  | 0.517913  | 4.269800 |
| C | 8.167000  | -0.111759 | 1.853730 |
| H | 7.667080  | 0.160026  | 0.922119 |
| H | 9.239970  | -0.216556 | 1.643560 |
| H | 7.809930  | -1.108160 | 2.146480 |
| H | 8.277690  | -0.459119 | 4.636150 |
| H | 9.708190  | 0.435755  | 4.134860 |
| H | 8.429840  | 1.259300  | 5.050880 |
| H | 7.131360  | 2.622050  | 3.761350 |
| H | -1.392980 | 4.011620  | 1.437850 |
| H | -0.667188 | 4.438590  | 3.078060 |
| H | -0.427419 | 1.818980  | 1.487230 |

Conf 39

|   |           |           |           |
|---|-----------|-----------|-----------|
| C | 2.059970  | 1.632630  | 2.898460  |
| C | 1.917050  | 0.949964  | 1.548280  |
| C | 2.167650  | -0.496575 | 1.697620  |
| N | 2.594740  | -0.671546 | 3.024350  |
| C | 2.644530  | 0.493336  | 3.757490  |
| C | 0.637319  | 2.061370  | 3.535980  |
| C | 2.912750  | 2.941690  | 3.018380  |
| C | 1.677880  | 1.409180  | 0.303567  |
| O | 2.081150  | -1.404320 | 0.885374  |
| O | 3.066000  | 0.561884  | 4.905150  |
| H | 2.896500  | -1.566730 | 3.389630  |
| H | 1.620040  | 0.686036  | -0.510140 |
| O | 1.526260  | 2.700550  | -0.020081 |
| C | 1.309340  | 2.999010  | -1.418760 |
| H | 0.766109  | 3.946870  | -1.417060 |
| C | 2.619800  | 3.114760  | -2.182740 |
| H | 0.656286  | 2.229890  | -1.848140 |
| H | 2.416600  | 3.388810  | -3.223720 |
| H | 3.259010  | 3.885400  | -1.742180 |
| H | 3.167900  | 2.167240  | -2.182580 |
| C | -0.149805 | 2.882710  | 2.530040  |
| C | -0.184191 | 0.866599  | 4.043820  |
| C | 1.065700  | 2.998930  | 4.700120  |
| C | 2.464880  | 3.582130  | 4.381370  |
| H | 2.542320  | 3.598020  | 2.221590  |
| C | 4.457120  | 2.875320  | 2.861300  |
| H | 2.424720  | 4.669050  | 4.272520  |
| O | 3.372330  | 3.368780  | 5.455960  |
| H | 1.141410  | 2.427760  | 5.629750  |
| H | 0.317403  | 3.779760  | 4.867570  |
| H | -1.115140 | 1.220610  | 4.497080  |
| H | -0.447607 | 0.174535  | 3.237100  |

|   |           |           |          |
|---|-----------|-----------|----------|
| H | 0.357528  | 0.311034  | 4.813470 |
| C | -1.389010 | 2.649530  | 2.087930 |
| H | 3.428900  | 2.406500  | 5.592320 |
| C | 4.921500  | 2.142860  | 1.584470 |
| C | 5.023390  | 4.307760  | 2.911530 |
| H | 4.865590  | 2.334650  | 3.721680 |
| H | 6.115360  | 4.303710  | 2.862610 |
| H | 4.653500  | 4.905070  | 2.066900 |
| H | 4.747250  | 4.809110  | 3.841270 |
| H | 4.531210  | 2.665500  | 0.700329 |
| H | 4.489480  | 1.137160  | 1.556780 |
| C | 6.452330  | 1.985040  | 1.428750 |
| C | 7.079660  | 1.159020  | 2.522090 |
| H | 6.626630  | 1.483090  | 0.464737 |
| H | 6.931860  | 2.963950  | 1.344390 |
| C | 8.154060  | 1.435110  | 3.281690 |
| C | 8.631990  | 0.457750  | 4.331040 |
| C | 8.983740  | 2.693100  | 3.182890 |
| H | 8.617280  | 3.397150  | 2.433340 |
| H | 10.024000 | 2.447580  | 2.929760 |
| H | 9.013010  | 3.212210  | 4.150070 |
| H | 9.667370  | 0.145842  | 4.137470 |
| H | 8.625140  | 0.918142  | 5.328210 |
| H | 8.007290  | -0.439390 | 4.367590 |
| H | 6.581360  | 0.203743  | 2.702090 |
| H | -1.867320 | 3.338930  | 1.398050 |
| H | -1.972930 | 1.784740  | 2.386030 |
| H | 0.352101  | 3.778850  | 2.170820 |

Conf 47

|   |           |           |           |
|---|-----------|-----------|-----------|
| C | 2.042400  | 1.789700  | 3.143170  |
| C | 2.242870  | 0.954378  | 1.889590  |
| C | 2.624250  | -0.419792 | 2.268380  |
| N | 2.809650  | -0.390174 | 3.661230  |
| C | 2.583980  | 0.841831  | 4.232150  |
| C | 0.482537  | 2.076620  | 3.458010  |
| C | 2.692530  | 3.211880  | 3.240680  |
| C | 2.198410  | 1.241970  | 0.573364  |
| O | 2.795410  | -1.413920 | 1.580780  |
| O | 2.771620  | 1.092540  | 5.416460  |
| H | 3.140110  | -1.190100 | 4.187290  |
| H | 2.384850  | 0.436134  | -0.136675 |
| O | 1.962310  | 2.458260  | 0.063149  |
| C | 1.992480  | 2.575390  | -1.378420 |
| H | 1.348800  | 3.430170  | -1.598930 |
| C | 3.404680  | 2.797990  | -1.898250 |
| H | 1.535810  | 1.679750  | -1.816220 |
| H | 3.380880  | 2.928630  | -2.985650 |
| H | 3.844860  | 3.695030  | -1.453110 |
| H | 4.052510  | 1.945040  | -1.672800 |
| C | -0.188876 | 2.664310  | 2.229190  |
| C | -0.271338 | 0.838297  | 3.966330  |
| C | 0.561955  | 3.185090  | 4.545460  |
| C | 1.916570  | 3.923140  | 4.407200  |
| H | 2.409150  | 3.721200  | 2.311780  |
| C | 4.234790  | 3.348330  | 3.373030  |

|   |           |           |           |
|---|-----------|-----------|-----------|
| H | 1.769250  | 4.975960  | 4.153100  |
| O | 2.618360  | 3.953590  | 5.644450  |
| H | 0.522618  | 2.734090  | 5.541120  |
| H | -0.292041 | 3.865450  | 4.471810  |
| H | -1.307600 | 1.102510  | 4.198260  |
| H | -0.289966 | 0.033119  | 3.224460  |
| H | 0.175674  | 0.451478  | 4.885620  |
| C | -1.282570 | 2.210760  | 1.609910  |
| H | 2.756890  | 3.028250  | 5.913760  |
| C | 5.026930  | 2.547500  | 2.317370  |
| C | 4.606030  | 4.844020  | 3.333060  |
| H | 4.523100  | 2.967540  | 4.359950  |
| H | 5.678670  | 4.992890  | 3.483440  |
| H | 4.341730  | 5.285580  | 2.362580  |
| H | 4.093030  | 5.399530  | 4.120640  |
| H | 4.721690  | 1.497450  | 2.337180  |
| H | 4.779570  | 2.916130  | 1.311510  |
| C | 6.560360  | 2.575610  | 2.507060  |
| C | 7.274720  | 1.730610  | 1.484360  |
| H | 6.925190  | 3.606780  | 2.417450  |
| H | 6.799930  | 2.253270  | 3.526400  |
| C | 7.990110  | 0.607312  | 1.670720  |
| C | 8.629420  | -0.107085 | 0.501988  |
| C | 8.235470  | -0.049221 | 3.008490  |
| H | 9.311920  | -0.105074 | 3.219180  |
| H | 7.758160  | 0.471133  | 3.840900  |
| H | 7.866360  | -1.083500 | 3.000970  |
| H | 8.257170  | -1.137150 | 0.419127  |
| H | 8.432130  | 0.403118  | -0.445492 |
| H | 9.718090  | -0.177376 | 0.630654  |
| H | 7.177470  | 2.089240  | 0.457339  |
| H | -1.697820 | 2.746400  | 0.761023  |
| H | -1.805180 | 1.308960  | 1.912100  |
| H | 0.262032  | 3.578590  | 1.848620  |

Conf 42

|   |          |           |           |
|---|----------|-----------|-----------|
| C | 1.972510 | 1.769210  | 3.241810  |
| C | 2.173700 | 0.786475  | 2.100210  |
| C | 2.429560 | -0.559604 | 2.647150  |
| N | 2.540270 | -0.388187 | 4.037620  |
| C | 2.379440 | 0.912808  | 4.457950  |
| C | 0.426369 | 2.203240  | 3.428470  |
| C | 2.727770 | 3.141820  | 3.224610  |
| C | 2.223420 | 0.927586  | 0.760311  |
| O | 2.565360 | -1.633330 | 2.081840  |
| O | 2.521670 | 1.279770  | 5.617910  |
| H | 2.779270 | -1.145660 | 4.666140  |
| H | 2.387020 | 0.036360  | 0.154245  |
| O | 2.108410 | 2.091980  | 0.108242  |
| C | 2.239320 | 2.046380  | -1.332040 |
| H | 1.752610 | 1.136440  | -1.702920 |
| C | 3.693960 | 2.124960  | -1.769840 |
| H | 1.669940 | 2.908250  | -1.687870 |
| H | 3.749140 | 2.133320  | -2.863930 |
| H | 4.163440 | 3.038730  | -1.394210 |
| H | 4.268220 | 1.266850  | -1.406840 |

|   |           |           |           |
|---|-----------|-----------|-----------|
| C | -0.130788 | 2.696450  | 2.104650  |
| C | -0.448996 | 1.088130  | 4.020400  |
| C | 0.536954  | 3.418220  | 4.392710  |
| C | 1.952050  | 4.033850  | 4.259310  |
| H | 2.533480  | 3.563820  | 2.231250  |
| C | 4.267080  | 3.176680  | 3.431980  |
| H | 1.903310  | 5.059900  | 3.885690  |
| O | 2.588690  | 4.149560  | 5.526320  |
| H | 0.408645  | 3.086300  | 5.426960  |
| H | -0.254436 | 4.147320  | 4.193350  |
| H | -1.472080 | 1.451160  | 4.157890  |
| H | -0.491297 | 0.208183  | 3.370030  |
| H | -0.083656 | 0.775706  | 5.001960  |
| C | -1.222870 | 2.257150  | 1.472390  |
| H | 2.638030  | 3.252240  | 5.901000  |
| C | 5.044170  | 2.213340  | 2.509800  |
| C | 4.760250  | 4.627390  | 3.262220  |
| H | 4.475680  | 2.881260  | 4.467210  |
| H | 5.831930  | 4.708900  | 3.463370  |
| H | 4.585890  | 4.981320  | 2.237040  |
| H | 4.252680  | 5.301020  | 3.955410  |
| H | 4.666850  | 1.193960  | 2.639220  |
| H | 4.860880  | 2.472220  | 1.457970  |
| C | 6.567810  | 2.173620  | 2.759730  |
| C | 7.237290  | 1.057520  | 2.000740  |
| H | 7.020460  | 3.136830  | 2.512590  |
| H | 6.736630  | 2.021790  | 3.837280  |
| C | 8.220550  | 1.131130  | 1.086050  |
| C | 8.767470  | -0.119433 | 0.435836  |
| C | 8.880780  | 2.409020  | 0.624802  |
| H | 8.454410  | 3.305960  | 1.077920  |
| H | 9.954110  | 2.393590  | 0.857578  |
| H | 8.802020  | 2.511180  | -0.465909 |
| H | 8.655450  | -0.078437 | -0.656306 |
| H | 9.842450  | -0.228231 | 0.634276  |
| H | 8.262990  | -1.020660 | 0.796059  |
| H | 6.857260  | 0.061449  | 2.237390  |
| H | -1.548890 | 2.722650  | 0.546662  |
| H | -1.830580 | 1.435670  | 1.837810  |
| H | 0.410663  | 3.526590  | 1.655530  |

Conf 56

|   |          |           |           |
|---|----------|-----------|-----------|
| C | 2.031030 | 1.630160  | 3.322350  |
| C | 2.384480 | 0.640606  | 2.218450  |
| C | 2.432310 | -0.727808 | 2.778470  |
| N | 2.243430 | -0.581999 | 4.158910  |
| C | 2.083240 | 0.722088  | 4.570920  |
| C | 0.542210 | 2.241730  | 3.201490  |
| C | 2.904260 | 2.918600  | 3.524760  |
| C | 2.696790 | 0.755860  | 0.910252  |
| O | 2.619060 | -1.800170 | 2.225160  |
| O | 1.988340 | 1.054770  | 5.745390  |
| H | 2.291010 | -1.360980 | 4.804640  |
| H | 2.928780 | -0.158176 | 0.362923  |
| O | 2.756030 | 1.903020  | 0.222335  |
| C | 3.240960 | 1.801510  | -1.140600 |

|   |           |           |           |
|---|-----------|-----------|-----------|
| H | 2.649450  | 1.041620  | -1.666020 |
| C | 3.100290  | 3.161760  | -1.794200 |
| H | 4.288060  | 1.478030  | -1.111830 |
| H | 3.468340  | 3.112470  | -2.823990 |
| H | 2.054330  | 3.480530  | -1.814650 |
| H | 3.683000  | 3.914590  | -1.255920 |
| C | 0.315876  | 2.783080  | 1.799530  |
| C | -0.564221 | 1.196150  | 3.457240  |
| C | 0.558371  | 3.344230  | 4.275970  |
| C | 2.011710  | 3.853900  | 4.426910  |
| H | 2.945030  | 3.389760  | 2.535850  |
| C | 4.353830  | 2.784170  | 4.066590  |
| H | 2.114980  | 4.884740  | 4.077890  |
| O | 2.394990  | 3.904280  | 5.796870  |
| H | 0.251395  | 2.920900  | 5.235720  |
| H | -0.151835 | 4.144240  | 4.052240  |
| H | -1.545070 | 1.675810  | 3.379900  |
| H | -0.533921 | 0.387265  | 2.718660  |
| H | -0.486803 | 0.758640  | 4.457310  |
| C | 0.115880  | 4.051180  | 1.431060  |
| H | 2.272740  | 3.008710  | 6.156380  |
| C | 5.282980  | 1.802310  | 3.313040  |
| C | 5.008580  | 4.177370  | 4.166090  |
| H | 4.279450  | 2.400500  | 5.090380  |
| H | 6.053300  | 4.083960  | 4.485120  |
| H | 5.003250  | 4.697550  | 3.200580  |
| H | 4.490890  | 4.800890  | 4.897140  |
| H | 6.176920  | 1.656760  | 3.934400  |
| H | 4.813330  | 0.814937  | 3.242300  |
| C | 5.745540  | 2.238840  | 1.906570  |
| C | 6.467120  | 1.132210  | 1.181370  |
| H | 4.868060  | 2.541280  | 1.320580  |
| H | 6.376920  | 3.127630  | 1.988040  |
| C | 7.695630  | 1.140370  | 0.632841  |
| C | 8.250230  | -0.092913 | -0.043322 |
| C | 8.633060  | 2.324530  | 0.627572  |
| H | 8.875140  | 2.620430  | -0.402241 |
| H | 8.229570  | 3.199380  | 1.140650  |
| H | 9.586010  | 2.061850  | 1.105880  |
| H | 8.502840  | 0.110971  | -1.092950 |
| H | 9.179510  | -0.421779 | 0.441248  |
| H | 7.541950  | -0.926221 | -0.018229 |
| H | 5.908180  | 0.195739  | 1.117990  |
| H | -0.074796 | 4.299770  | 0.391131  |
| H | 0.134190  | 4.884400  | 2.126860  |
| H | 0.274218  | 2.017770  | 1.027220  |

Conf 53

|   |          |           |          |
|---|----------|-----------|----------|
| C | 2.096970 | 1.827050  | 3.116830 |
| C | 2.325190 | 1.002930  | 1.860310 |
| C | 2.640400 | -0.389434 | 2.234580 |
| N | 2.766210 | -0.385228 | 3.634260 |
| C | 2.560390 | 0.846469  | 4.213160 |
| C | 0.536734 | 2.162190  | 3.371780 |
| C | 2.789360 | 3.225490  | 3.261590 |
| C | 2.375720 | 1.313990  | 0.549763 |



|   |           |           |           |
|---|-----------|-----------|-----------|
| O | 2.805240  | -1.379640 | 1.539970  |
| O | 2.707170  | 1.074660  | 5.407700  |
| H | 3.046150  | -1.203220 | 4.161870  |
| H | 2.584270  | 0.514335  | -0.161195 |
| O | 2.243970  | 2.550610  | 0.049547  |
| C | 2.329960  | 2.679030  | -1.389240 |
| H | 3.125250  | 2.018730  | -1.756130 |
| C | 1.000800  | 2.385940  | -2.068320 |
| H | 2.640680  | 3.713290  | -1.553850 |
| H | 1.100150  | 2.535820  | -3.148940 |
| H | 0.682673  | 1.353060  | -1.895780 |
| H | 0.219018  | 3.053990  | -1.696590 |
| C | -0.062238 | 2.787740  | 2.124510  |
| C | -0.279267 | 0.944409  | 3.831340  |
| C | 0.607527  | 3.253910  | 4.477220  |
| C | 1.991450  | 3.945730  | 4.407060  |
| H | 2.559700  | 3.757110  | 2.330460  |
| C | 4.329090  | 3.309910  | 3.454140  |
| H | 1.891100  | 5.006790  | 4.164640  |
| O | 2.642280  | 3.932900  | 5.672090  |
| H | 0.509815  | 2.791980  | 5.463820  |
| H | -0.218570 | 3.964560  | 4.376700  |
| H | -1.314100 | 1.241470  | 4.027040  |
| H | -0.296304 | 0.150894  | 3.076920  |
| H | 0.117074  | 0.529483  | 4.761530  |
| C | -1.158480 | 2.394130  | 1.469880  |
| H | 2.739490  | 2.999260  | 5.930740  |
| C | 5.133700  | 2.502020  | 2.413290  |
| C | 4.748390  | 4.793400  | 3.454790  |
| H | 4.568150  | 2.903280  | 4.444020  |
| H | 5.818250  | 4.905050  | 3.650290  |
| H | 4.537690  | 5.258480  | 2.482200  |
| H | 4.221960  | 5.352530  | 4.230830  |
| H | 4.803840  | 1.459230  | 2.413650  |
| H | 4.924070  | 2.886810  | 1.404800  |
| C | 6.661160  | 2.492030  | 2.646450  |
| C | 7.381670  | 1.631800  | 1.640950  |
| H | 7.053430  | 3.514180  | 2.569860  |
| H | 6.864430  | 2.161390  | 3.671020  |
| C | 8.076940  | 0.499028  | 1.845000  |
| C | 8.726100  | -0.230117 | 0.690856  |
| C | 8.289220  | -0.154991 | 3.189690  |
| H | 7.805730  | 0.376257  | 4.011590  |
| H | 7.904890  | -1.183720 | 3.180370  |
| H | 9.360940  | -0.225893 | 3.419160  |
| H | 9.811240  | -0.315636 | 0.838816  |
| H | 8.340360  | -1.255070 | 0.606135  |
| H | 8.552580  | 0.278282  | -0.262209 |
| H | 7.308020  | 1.987230  | 0.610812  |
| H | -1.520100 | 2.954270  | 0.612379  |
| H | -1.736400 | 1.519640  | 1.750740  |
| H | 0.447305  | 3.678770  | 1.763180  |

### Cartesian Coordinates of Conformers (>2% population) of 1d

Conf 9

|   |           |           |           |
|---|-----------|-----------|-----------|
| C | -0.293099 | -1.816240 | -1.458090 |
| C | 0.663116  | -0.651326 | -1.215110 |
| C | -0.108303 | 0.596564  | -1.061280 |
| N | -1.448730 | 0.241602  | -1.326880 |
| C | -1.637210 | -1.082710 | -1.635760 |
| C | -0.421222 | -2.828810 | -0.206841 |
| C | -0.012085 | -2.795130 | -2.649050 |
| C | 2.012280  | -0.715982 | -1.212240 |
| O | 0.241791  | 1.731730  | -0.794495 |
| O | -2.712970 | -1.563620 | -1.973320 |
| H | -2.195670 | 0.925250  | -1.353460 |
| H | 2.517570  | -1.663630 | -1.394990 |
| O | 2.805430  | 0.342550  | -1.005470 |
| C | 4.227080  | 0.109257  | -1.110460 |
| H | 4.454850  | -0.240226 | -2.125620 |
| C | 4.935930  | 1.414160  | -0.805587 |
| H | 4.511620  | -0.675744 | -0.397637 |
| H | 4.636470  | 2.190990  | -1.514470 |
| H | 4.696090  | 1.757860  | 0.204475  |
| H | 6.019020  | 1.272250  | -0.879010 |
| C | 0.964078  | -3.215920 | 0.288417  |
| C | -1.165310 | -2.215310 | 0.997338  |
| C | -1.193360 | -4.014140 | -0.821592 |
| C | -0.898103 | -4.056970 | -2.340710 |
| H | 1.030160  | -3.114790 | -2.511150 |
| C | -0.152051 | -2.302000 | -4.115040 |
| H | -0.344134 | -4.959320 | -2.613500 |
| O | -2.096920 | -4.134800 | -3.101470 |
| H | -2.266880 | -3.851060 | -0.696205 |
| H | -0.961508 | -4.955990 | -0.316887 |
| H | -1.222160 | -2.949250 | 1.807970  |
| H | -0.644307 | -1.333250 | 1.386530  |
| H | -2.188610 | -1.929110 | 0.737481  |
| C | 1.612950  | -4.369960 | 0.103289  |
| H | -2.632480 | -3.357230 | -2.864070 |
| C | 0.625837  | -1.004310 | -4.423420 |
| C | 0.279990  | -3.437570 | -5.063860 |
| H | -1.212560 | -2.105170 | -4.306300 |
| H | 0.145423  | -3.151440 | -6.110070 |
| H | 1.340800  | -3.685180 | -4.920320 |
| H | -0.314913 | -4.337940 | -4.899510 |
| H | 0.341343  | -0.220136 | -3.714930 |
| H | 1.701190  | -1.173860 | -4.267420 |
| C | 0.420342  | -0.431993 | -5.845950 |
| C | -1.003310 | -0.020381 | -6.119880 |
| H | 1.065170  | 0.455891  | -5.929770 |
| H | 0.783893  | -1.135630 | -6.599610 |
| C | -1.789590 | -0.333383 | -7.164590 |
| C | -3.202730 | 0.195402  | -7.255370 |
| C | -1.378200 | -1.204710 | -8.327370 |
| H | -0.360509 | -1.590420 | -8.242110 |
| H | -2.058220 | -2.061160 | -8.426530 |
| H | -1.444650 | -0.643637 | -9.269290 |
| H | -3.459250 | 0.823215  | -6.397180 |

|   |           |           |           |
|---|-----------|-----------|-----------|
| H | -3.343750 | 0.789987  | -8.168240 |
| H | -3.927630 | -0.628355 | -7.303450 |
| H | -1.435540 | 0.628278  | -5.354640 |
| H | 2.591440  | -4.534030 | 0.546120  |
| H | 1.205230  | -5.191930 | -0.478000 |
| H | 1.450460  | -2.453530 | 0.895884  |

Conf 16

|   |           |           |           |
|---|-----------|-----------|-----------|
| C | -0.514204 | -2.090220 | -1.331260 |
| C | 0.252517  | -0.770364 | -1.336640 |
| C | -0.680201 | 0.343136  | -1.081320 |
| N | -1.964660 | -0.243975 | -1.059640 |
| C | -1.974600 | -1.600090 | -1.269250 |
| C | -0.224336 | -3.008260 | -0.034745 |
| C | -0.298111 | -3.103170 | -2.507330 |
| C | 1.566410  | -0.613392 | -1.608140 |
| O | -0.489581 | 1.536680  | -0.935850 |
| O | -2.994650 | -2.273390 | -1.366970 |
| H | -2.810480 | 0.305310  | -0.965052 |
| H | 2.183280  | -1.476030 | -1.857670 |
| O | 2.188870  | 0.571082  | -1.600130 |
| C | 3.563350  | 0.577678  | -2.044900 |
| H | 3.593610  | 0.279429  | -3.100420 |
| C | 4.107160  | 1.979760  | -1.853710 |
| H | 4.131010  | -0.155258 | -1.456540 |
| H | 4.067950  | 2.270350  | -0.800122 |
| H | 5.148390  | 2.021090  | -2.189540 |
| H | 3.524470  | 2.701270  | -2.432860 |
| C | 1.275860  | -3.125810 | 0.188073  |
| C | -0.820334 | -2.429360 | 1.265070  |
| C | -0.881965 | -4.347370 | -0.426845 |
| C | -0.879377 | -4.461720 | -1.970830 |
| H | 0.790382  | -3.240790 | -2.565880 |
| C | -0.793944 | -2.753200 | -3.936660 |
| H | -0.241449 | -5.283040 | -2.308360 |
| O | -2.170050 | -4.787740 | -2.470830 |
| H | -1.923390 | -4.350510 | -0.094768 |
| H | -0.397925 | -5.196840 | 0.062674  |
| H | -0.592858 | -3.096080 | 2.103350  |
| H | -0.396344 | -1.446640 | 1.500320  |
| H | -1.908350 | -2.333790 | 1.203810  |
| C | 2.067780  | -4.172160 | -0.067129 |
| H | -2.775800 | -4.091190 | -2.161200 |
| C | -0.316265 | -1.378400 | -4.452070 |
| C | -0.372976 | -3.880580 | -4.900890 |
| H | -1.890510 | -2.734290 | -3.916770 |
| H | -0.757002 | -3.704080 | -5.909200 |
| H | 0.721515  | -3.946570 | -4.969070 |
| H | -0.762342 | -4.846670 | -4.574610 |
| H | 0.782305  | -1.355010 | -4.496620 |
| H | -0.601751 | -0.595524 | -3.742860 |
| C | -0.879614 | -0.977833 | -5.833300 |
| C | -0.560639 | 0.453543  | -6.179000 |
| H | -0.511995 | -1.655240 | -6.607670 |
| H | -1.973340 | -1.103110 | -5.808710 |
| C | 0.135605  | 0.931994  | -7.225420 |

|   |           |           |           |
|---|-----------|-----------|-----------|
| C | 0.346718  | 2.418940  | -7.398870 |
| C | 0.754992  | 0.086888  | -8.313450 |
| H | 1.832350  | 0.286435  | -8.389330 |
| H | 0.622381  | -0.985582 | -8.158910 |
| H | 0.323499  | 0.340782  | -9.291100 |
| H | 1.417040  | 2.665460  | -7.424170 |
| H | -0.075530 | 2.768070  | -8.351040 |
| H | -0.115622 | 2.993560  | -6.591150 |
| H | -0.950533 | 1.185800  | -5.469070 |
| H | 3.126200  | -4.139500 | 0.175990  |
| H | 1.705840  | -5.094580 | -0.512058 |
| H | 1.729560  | -2.247590 | 0.645931  |

Conf 266

|   |           |           |           |
|---|-----------|-----------|-----------|
| C | -0.498176 | -2.252090 | -1.278990 |
| C | 0.154420  | -0.872341 | -1.305120 |
| C | -0.890026 | 0.168050  | -1.253700 |
| N | -2.115280 | -0.529762 | -1.338150 |
| C | -1.989000 | -1.892680 | -1.435360 |
| C | -0.301753 | -3.038080 | 0.118278  |
| C | -0.053554 | -3.327500 | -2.328000 |
| C | 1.475090  | -0.618115 | -1.429210 |
| O | -0.816205 | 1.380820  | -1.180960 |
| O | -2.930140 | -2.661110 | -1.600730 |
| H | -3.007680 | -0.053640 | -1.392150 |
| H | 2.185820  | -1.437890 | -1.528050 |
| O | 1.994260  | 0.615377  | -1.449200 |
| C | 3.414630  | 0.710403  | -1.693570 |
| H | 3.630380  | 0.301465  | -2.688850 |
| C | 3.804900  | 2.172510  | -1.603290 |
| H | 3.945330  | 0.108063  | -0.944543 |
| H | 4.878360  | 2.280660  | -1.789350 |
| H | 3.260360  | 2.763380  | -2.344850 |
| H | 3.580160  | 2.572570  | -0.610618 |
| C | 1.162810  | -3.002430 | 0.528263  |
| C | -1.102130 | -2.417900 | 1.282130  |
| C | -0.794248 | -4.457110 | -0.231385 |
| C | -0.582559 | -4.689670 | -1.747020 |
| H | 1.041350  | -3.366540 | -2.246250 |
| C | -0.395289 | -3.140120 | -3.831390 |
| H | 0.160194  | -5.470750 | -1.930430 |
| O | -1.766140 | -5.174180 | -2.368910 |
| H | -1.866420 | -4.527760 | -0.030596 |
| H | -0.311868 | -5.219050 | 0.386909  |
| H | -0.928977 | -2.994650 | 2.196660  |
| H | -0.792437 | -1.385400 | 1.479270  |
| H | -2.177870 | -2.427010 | 1.083660  |
| C | 2.062360  | -3.988800 | 0.457605  |
| H | -2.463040 | -4.516090 | -2.198220 |
| C | -0.000994 | -1.761780 | -4.405110 |
| C | 0.257334  | -4.283540 | -4.634120 |
| H | -1.481450 | -3.243210 | -3.942390 |
| H | -0.007427 | -4.228610 | -5.693330 |
| H | 1.352480  | -4.234130 | -4.562680 |
| H | -0.072821 | -5.259160 | -4.272350 |
| H | -0.436661 | -0.962530 | -3.799280 |

|   |           |           |           |
|---|-----------|-----------|-----------|
| H | 1.089310  | -1.628840 | -4.337660 |
| C | -0.449763 | -1.522380 | -5.864320 |
| C | -0.095153 | -0.139636 | -6.346330 |
| H | 0.033810  | -2.253110 | -6.525100 |
| H | -1.527170 | -1.706070 | -5.940390 |
| C | -0.915480 | 0.867837  | -6.692720 |
| C | -0.359518 | 2.198830  | -7.144560 |
| C | -2.424080 | 0.799573  | -6.675760 |
| H | -2.835070 | 1.578440  | -6.019700 |
| H | -2.830150 | 0.991248  | -7.678080 |
| H | -2.811190 | -0.163112 | -6.336700 |
| H | -0.705428 | 2.447480  | -8.157090 |
| H | -0.701746 | 3.010530  | -6.488520 |
| H | 0.734477  | 2.203650  | -7.148650 |
| H | 0.977939  | 0.055386  | -6.402950 |
| H | 3.075560  | -3.843330 | 0.821880  |
| H | 1.834720  | -4.969880 | 0.050825  |
| H | 1.482540  | -2.055650 | 0.961993  |

Conf 290

|   |           |           |           |
|---|-----------|-----------|-----------|
| C | -0.463577 | -2.352930 | -1.355190 |
| C | 0.138831  | -0.952286 | -1.349430 |
| C | -0.939044 | 0.050667  | -1.283680 |
| N | -2.141750 | -0.686931 | -1.368090 |
| C | -1.970450 | -2.042120 | -1.479560 |
| C | -0.214764 | -3.163320 | 0.018727  |
| C | -0.017485 | -3.386720 | -2.447270 |
| C | 1.453130  | -0.648077 | -1.416410 |
| O | -0.907872 | 1.264420  | -1.196240 |
| O | -2.887290 | -2.841330 | -1.638550 |
| H | -3.050460 | -0.241011 | -1.403540 |
| H | 2.199310  | -1.435620 | -1.504210 |
| O | 1.925260  | 0.603548  | -1.400300 |
| C | 3.358210  | 0.749982  | -1.502100 |
| H | 3.696220  | 0.291346  | -2.440450 |
| C | 3.677340  | 2.231650  | -1.468110 |
| H | 3.828190  | 0.220864  | -0.663083 |
| H | 4.759690  | 2.378540  | -1.543130 |
| H | 3.195480  | 2.749800  | -2.301810 |
| H | 3.327550  | 2.680630  | -0.534365 |
| C | 1.271340  | -3.227420 | 0.328899  |
| C | -1.008890 | -2.590160 | 1.201060  |
| C | -0.674238 | -4.597530 | -0.358506 |
| C | -0.490889 | -4.779850 | -1.887160 |
| H | 1.081010  | -3.392000 | -2.413830 |
| C | -0.408086 | -3.164750 | -3.934220 |
| H | 0.270159  | -5.533130 | -2.107520 |
| O | -1.673660 | -5.283640 | -2.493160 |
| H | -1.735490 | -4.720670 | -0.126476 |
| H | -0.132096 | -5.352620 | 0.219273  |
| H | -0.826715 | -3.184820 | 2.101540  |
| H | -0.727754 | -1.554630 | 1.419910  |
| H | -2.083770 | -2.619410 | 1.004190  |
| C | 1.898740  | -2.766280 | 1.415400  |
| H | -2.385020 | -4.651350 | -2.286940 |
| C | -0.037828 | -1.766990 | -4.476700 |

|   |           |           |           |
|---|-----------|-----------|-----------|
| C | 0.231364  | -4.278170 | -4.788160 |
| H | -1.496120 | -3.274360 | -4.016010 |
| H | -0.064744 | -4.194430 | -5.837100 |
| H | 1.327720  | -4.218820 | -4.748010 |
| H | -0.078869 | -5.267030 | -4.445630 |
| H | -0.458861 | -0.988559 | -3.834940 |
| H | 1.053460  | -1.630920 | -4.434780 |
| C | -0.527904 | -1.485560 | -5.914930 |
| C | -0.187118 | -0.088878 | -6.365890 |
| H | -0.063326 | -2.196020 | -6.610520 |
| H | -1.607100 | -1.667650 | -5.965800 |
| C | -1.016910 | 0.929324  | -6.653190 |
| C | -0.473977 | 2.273360  | -7.081650 |
| C | -2.524130 | 0.861940  | -6.586560 |
| H | -2.964230 | 1.087470  | -7.567210 |
| H | -2.901120 | -0.111243 | -6.266550 |
| H | -2.910380 | 1.618670  | -5.890780 |
| H | -0.792032 | 3.064170  | -6.388970 |
| H | 0.619239  | 2.277160  | -7.122870 |
| H | -0.853684 | 2.554190  | -8.073460 |
| H | 0.883817  | 0.107088  | -6.451810 |
| H | 2.964990  | -2.926390 | 1.549080  |
| H | 1.388990  | -2.226630 | 2.207080  |
| H | 1.873390  | -3.767660 | -0.402304 |

Conf 1

|   |           |           |           |
|---|-----------|-----------|-----------|
| C | -0.327721 | -1.923340 | -1.451860 |
| C | 0.600754  | -0.717869 | -1.328040 |
| C | -0.199129 | 0.521482  | -1.309360 |
| N | -1.530350 | 0.110076  | -1.535140 |
| C | -1.687960 | -1.242600 | -1.704660 |
| C | -0.436560 | -2.808120 | -0.105856 |
| C | -0.021372 | -3.010510 | -2.538430 |
| C | 1.950890  | -0.751244 | -1.312120 |
| O | 0.124908  | 1.686300  | -1.165500 |
| O | -2.751970 | -1.780520 | -1.989800 |
| H | -2.291190 | 0.770211  | -1.641320 |
| H | 2.478290  | -1.701130 | -1.391220 |
| O | 2.719220  | 0.341027  | -1.215490 |
| C | 4.146530  | 0.128638  | -1.278190 |
| H | 4.438400  | -0.561484 | -0.475801 |
| C | 4.824310  | 1.475450  | -1.120280 |
| H | 4.394600  | -0.331563 | -2.243250 |
| H | 5.910970  | 1.349810  | -1.165030 |
| H | 4.564140  | 1.929130  | -0.159890 |
| H | 4.518320  | 2.157710  | -1.918150 |
| C | 0.955527  | -3.113190 | 0.426464  |
| C | -1.197130 | -2.093630 | 1.030340  |
| C | -1.180480 | -4.066300 | -0.599159 |
| C | -0.882211 | -4.253150 | -2.106880 |
| H | 1.027010  | -3.292350 | -2.368460 |
| C | -0.166837 | -2.666130 | -4.045680 |
| H | -0.309983 | -5.166760 | -2.289750 |
| O | -2.078330 | -4.429160 | -2.855780 |
| H | -2.257610 | -3.916420 | -0.489410 |
| H | -0.927481 | -4.947770 | -0.003731 |

|   |           |           |           |
|---|-----------|-----------|-----------|
| H | -1.238300 | -2.742740 | 1.911240  |
| H | -0.697464 | -1.164700 | 1.327550  |
| H | -2.226320 | -1.859200 | 0.743352  |
| C | 1.630150  | -4.265250 | 0.357362  |
| H | -2.631360 | -3.645050 | -2.690410 |
| C | 0.597794  | -1.394040 | -4.473360 |
| C | 0.278025  | -3.883360 | -4.880780 |
| H | -1.230870 | -2.502050 | -4.246510 |
| H | 0.138341  | -3.704750 | -5.950590 |
| H | 1.342770  | -4.100500 | -4.719100 |
| H | -0.302954 | -4.771480 | -4.625720 |
| H | 0.266001  | -0.541733 | -3.873690 |
| H | 1.668370  | -1.524250 | -4.255490 |
| C | 0.454252  | -0.986882 | -5.961370 |
| C | -0.966065 | -0.740775 | -6.403030 |
| H | 1.066780  | -0.093262 | -6.118710 |
| H | 0.894660  | -1.764610 | -6.598700 |
| C | -1.559500 | 0.434589  | -6.679810 |
| C | -3.005640 | 0.487177  | -7.116670 |
| C | -0.886929 | 1.784450  | -6.597580 |
| H | -1.420070 | 2.437040  | -5.893550 |
| H | 0.155216  | 1.732330  | -6.277060 |
| H | -0.916647 | 2.289860  | -7.572310 |
| H | -3.603420 | 1.100490  | -6.428850 |
| H | -3.100250 | 0.949527  | -8.108710 |
| H | -3.455020 | -0.509031 | -7.160930 |
| H | -1.581730 | -1.635190 | -6.504340 |
| H | 2.610700  | -4.362940 | 0.815000  |
| H | 1.242130  | -5.149630 | -0.139713 |
| H | 1.423090  | -2.283730 | 0.955831  |

Conf 27

|   |           |           |           |
|---|-----------|-----------|-----------|
| C | -0.458608 | -2.029520 | -1.389760 |
| C | 0.263781  | -0.684761 | -1.425380 |
| C | -0.700530 | 0.400322  | -1.168400 |
| N | -1.964270 | -0.228539 | -1.113480 |
| C | -1.933140 | -1.586670 | -1.305780 |
| C | -0.115543 | -2.923080 | -0.090028 |
| C | -0.231735 | -3.047340 | -2.559520 |
| C | 1.565200  | -0.486891 | -1.729970 |
| O | -0.547253 | 1.601430  | -1.040980 |
| O | -2.931890 | -2.294650 | -1.375350 |
| H | -2.825980 | 0.293847  | -1.010340 |
| H | 2.211010  | -1.332800 | -1.964390 |
| O | 2.132670  | 0.721643  | -1.806320 |
| C | 3.548280  | 0.771279  | -2.080020 |
| H | 3.694700  | 1.714910  | -2.610470 |
| C | 4.364640  | 0.728355  | -0.796843 |
| H | 3.814610  | -0.049920 | -2.757960 |
| H | 4.226230  | -0.220092 | -0.267334 |
| H | 5.429680  | 0.834992  | -1.030270 |
| H | 4.072400  | 1.543990  | -0.129333 |
| C | 1.391540  | -2.989280 | 0.105666  |
| C | -0.705770 | -2.349590 | 1.214850  |
| C | -0.735707 | -4.287250 | -0.455521 |
| C | -0.757400 | -4.418520 | -1.998040 |

|   |           |           |           |
|---|-----------|-----------|-----------|
| H | 0.859409  | -3.149390 | -2.637910 |
| C | -0.765906 | -2.729530 | -3.982510 |
| H | -0.098697 | -5.221890 | -2.338850 |
| O | -2.045500 | -4.792910 | -2.470130 |
| H | -1.770300 | -4.320380 | -0.104417 |
| H | -0.215379 | -5.115020 | 0.034020  |
| H | -0.440571 | -2.998800 | 2.055810  |
| H | -0.310476 | -1.350650 | 1.431110  |
| H | -1.797300 | -2.290690 | 1.173410  |
| C | 2.212410  | -4.012200 | -0.153062 |
| H | -2.668320 | -4.113150 | -2.157100 |
| C | -0.341939 | -1.346630 | -4.523010 |
| C | -0.327876 | -3.854400 | -4.942240 |
| H | -1.861940 | -2.745140 | -3.941120 |
| H | -0.735500 | -3.701390 | -5.945060 |
| H | 0.766721  | -3.887100 | -5.030140 |
| H | -0.680954 | -4.828270 | -4.598320 |
| H | 0.754062  | -1.290580 | -4.593470 |
| H | -0.634618 | -0.564387 | -3.816070 |
| C | -0.949258 | -0.979315 | -5.894800 |
| C | -0.673984 | 0.454107  | -6.268250 |
| H | -0.584662 | -1.658480 | -6.668990 |
| H | -2.038630 | -1.130900 | -5.840640 |
| C | -0.024545 | 0.933997  | -7.343670 |
| C | 0.148582  | 2.422770  | -7.541460 |
| C | 0.575650  | 0.088789  | -8.442330 |
| H | 0.472770  | -0.984303 | -8.270350 |
| H | 0.104747  | 0.320346  | -9.407280 |
| H | 1.644940  | 0.311185  | -8.558180 |
| H | 1.212000  | 2.691410  | -7.604300 |
| H | -0.311678 | 2.751090  | -8.483390 |
| H | -0.299497 | 2.997320  | -6.725720 |
| H | -1.055230 | 1.186760  | -5.554090 |
| H | 3.273590  | -3.943190 | 0.069603  |
| H | 1.872250  | -4.950630 | -0.581348 |
| H | 1.824010  | -2.091120 | 0.545155  |

Conf 21

|   |           |           |           |
|---|-----------|-----------|-----------|
| C | -0.254786 | -1.803510 | -1.325520 |
| C | 0.824371  | -0.738924 | -1.161710 |
| C | 0.195401  | 0.583144  | -0.992081 |
| N | -1.190380 | 0.361964  | -1.153870 |
| C | -1.531970 | -0.940865 | -1.411140 |
| C | -0.383041 | -2.791300 | -0.055337 |
| C | -0.178505 | -2.803990 | -2.531280 |
| C | 2.159090  | -0.944417 | -1.190120 |
| O | 0.673782  | 1.682550  | -0.779694 |
| O | -2.673600 | -1.318050 | -1.651660 |
| H | -1.865850 | 1.116560  | -1.139790 |
| H | 2.561670  | -1.941650 | -1.357400 |
| O | 3.062290  | 0.031762  | -1.041920 |
| C | 4.449760  | -0.364886 | -1.095900 |
| H | 4.642550  | -1.085810 | -0.291097 |
| C | 5.296370  | 0.882206  | -0.933458 |
| H | 4.642340  | -0.854431 | -2.059520 |
| H | 5.088390  | 1.367860  | 0.023956  |



|   |           |           |           |
|---|-----------|-----------|-----------|
| H | 5.089870  | 1.597020  | -1.734850 |
| H | 6.357690  | 0.615520  | -0.967310 |
| C | 0.958014  | -3.439620 | 0.244745  |
| C | -0.957391 | -2.094050 | 1.186150  |
| C | -1.325640 | -3.900190 | -0.596561 |
| C | -1.159090 | -3.970430 | -2.136600 |
| H | 0.836777  | -3.223930 | -2.497800 |
| C | -0.392856 | -2.292280 | -3.981910 |
| H | -0.723620 | -4.924880 | -2.444260 |
| O | -2.417650 | -3.927100 | -2.795300 |
| H | -2.365530 | -3.642610 | -0.378848 |
| H | -1.126930 | -4.861010 | -0.111491 |
| H | -1.048160 | -2.807200 | 2.011300  |
| H | -0.321333 | -1.269010 | 1.523920  |
| H | -1.956560 | -1.697660 | 0.987656  |
| C | 1.665660  | -3.364500 | 1.376330  |
| H | -2.850290 | -3.099270 | -2.520180 |
| C | 0.507962  | -1.096610 | -4.360960 |
| C | -0.183961 | -3.465550 | -4.959800 |
| H | -1.434840 | -1.968760 | -4.079010 |
| H | -0.376594 | -3.159080 | -5.991020 |
| H | 0.849350  | -3.836150 | -4.911110 |
| H | -0.863301 | -4.290720 | -4.738550 |
| H | 0.383267  | -0.288309 | -3.634000 |
| H | 1.563710  | -1.397780 | -4.295160 |
| C | 0.254947  | -0.494621 | -5.763310 |
| C | -1.125490 | 0.089970  | -5.917850 |
| H | 0.994249  | 0.308200  | -5.904560 |
| H | 0.464933  | -1.232510 | -6.542250 |
| C | -2.030150 | -0.119180 | -6.890230 |
| C | -3.370070 | 0.579928  | -6.864020 |
| C | -1.829090 | -1.028810 | -8.078790 |
| H | -0.863061 | -1.537240 | -8.077860 |
| H | -2.615310 | -1.794500 | -8.115440 |
| H | -1.905420 | -0.459074 | -9.014740 |
| H | -4.192280 | -0.148072 | -6.844750 |
| H | -3.473290 | 1.231320  | -5.991380 |
| H | -3.514150 | 1.190860  | -7.765530 |
| H | -1.407920 | 0.783696  | -5.122790 |
| H | 2.589070  | -3.925490 | 1.490420  |
| H | 1.360330  | -2.760250 | 2.224560  |
| H | 1.346080  | -4.085470 | -0.543497 |

Conf 39

|   |           |           |           |
|---|-----------|-----------|-----------|
| C | -0.489767 | -2.158580 | -1.400930 |
| C | 0.281006  | -0.843206 | -1.379570 |
| C | -0.645348 | 0.270412  | -1.109780 |
| N | -1.932680 | -0.312098 | -1.081770 |
| C | -1.949080 | -1.664790 | -1.302230 |
| C | -0.178292 | -3.107170 | -0.132688 |
| C | -0.316169 | -3.139650 | -2.612510 |
| C | 1.604790  | -0.690157 | -1.600920 |
| O | -0.451056 | 1.462140  | -0.953617 |
| O | -2.972360 | -2.335470 | -1.388560 |
| H | -2.775260 | 0.238344  | -0.967576 |
| H | 2.228260  | -1.549590 | -1.840520 |

|   |           |           |           |
|---|-----------|-----------|-----------|
| O | 2.230380  | 0.491416  | -1.562210 |
| C | 3.640930  | 0.480689  | -1.872530 |
| H | 3.776260  | 0.097632  | -2.892190 |
| C | 4.155380  | 1.901120  | -1.746240 |
| H | 4.151940  | -0.193077 | -1.172680 |
| H | 5.225270  | 1.928490  | -1.977030 |
| H | 3.631180  | 2.564600  | -2.439540 |
| H | 4.007270  | 2.276910  | -0.730020 |
| C | 1.314820  | -3.368530 | -0.026415 |
| C | -0.743181 | -2.549320 | 1.181440  |
| C | -0.857064 | -4.441290 | -0.545936 |
| C | -0.891829 | -4.509930 | -2.094550 |
| H | 0.768416  | -3.277720 | -2.724280 |
| C | -0.852011 | -2.742690 | -4.015130 |
| H | -0.267896 | -5.325980 | -2.468680 |
| O | -2.196070 | -4.814880 | -2.569910 |
| H | -1.887620 | -4.462580 | -0.181599 |
| H | -0.344650 | -5.300670 | -0.102302 |
| H | -0.528173 | -3.235870 | 2.006110  |
| H | -0.309298 | -1.575840 | 1.433180  |
| H | -1.829140 | -2.436890 | 1.126670  |
| C | 2.123760  | -3.075570 | 0.996588  |
| H | -2.788820 | -4.123160 | -2.225620 |
| C | -0.352954 | -1.366570 | -4.506800 |
| C | -0.488767 | -3.852460 | -5.022400 |
| H | -1.946460 | -2.698060 | -3.958820 |
| H | -0.899681 | -3.638400 | -6.012630 |
| H | 0.601229  | -3.941030 | -5.128150 |
| H | -0.890748 | -4.817920 | -4.710240 |
| H | -0.591389 | -0.596964 | -3.766640 |
| H | 0.743923  | -1.373120 | -4.586760 |
| C | -0.949283 | -0.910751 | -5.856630 |
| C | -0.593788 | 0.517921  | -6.176890 |
| H | -0.631621 | -1.579020 | -6.660450 |
| H | -2.045170 | -1.000450 | -5.796780 |
| C | 0.079852  | 1.000300  | -7.236210 |
| C | 0.337062  | 2.483190  | -7.378880 |
| C | 0.628912  | 0.164163  | -8.368030 |
| H | 1.708990  | 0.329270  | -8.479480 |
| H | 0.465078  | -0.906975 | -8.235840 |
| H | 0.170570  | 0.458361  | -9.321900 |
| H | 1.413900  | 2.693100  | -7.436800 |
| H | -0.106180 | 2.872350  | -8.305680 |
| H | -0.075501 | 3.051230  | -6.540160 |
| H | -0.931243 | 1.243420  | -5.434000 |
| H | 3.169870  | -3.368240 | 0.976845  |
| H | 1.786900  | -2.548960 | 1.883730  |
| H | 1.750230  | -3.911430 | -0.865868 |

Conf 11

|   |           |           |           |
|---|-----------|-----------|-----------|
| C | -0.532513 | -2.072290 | -1.322630 |
| C | 0.200042  | -0.734035 | -1.269560 |
| C | -0.773504 | 0.353500  | -1.063870 |
| N | -2.042300 | -0.265016 | -1.124370 |
| C | -2.005790 | -1.618810 | -1.344380 |
| C | -0.297960 | -2.995060 | -0.018060 |

|   |           |           |           |
|---|-----------|-----------|-----------|
| C | -0.222736 | -3.068600 | -2.491800 |
| C | 1.526020  | -0.543622 | -1.446380 |
| O | -0.622621 | 1.550600  | -0.900634 |
| O | -3.000780 | -2.316440 | -1.508610 |
| H | -2.905600 | 0.262770  | -1.077470 |
| H | 2.179080  | -1.387280 | -1.669300 |
| O | 2.123750  | 0.648975  | -1.353890 |
| C | 3.509630  | 0.727019  | -1.749340 |
| H | 3.931090  | 1.521340  | -1.128790 |
| C | 3.647880  | 1.051030  | -3.229100 |
| H | 4.011130  | -0.215400 | -1.492430 |
| H | 4.706980  | 1.162560  | -3.486610 |
| H | 3.131880  | 1.985420  | -3.466620 |
| H | 3.225500  | 0.256942  | -3.853000 |
| C | 1.188570  | -3.079160 | 0.294032  |
| C | -0.984641 | -2.442360 | 1.247980  |
| C | -0.897572 | -4.346000 | -0.458848 |
| C | -0.798762 | -4.446820 | -2.000420 |
| H | 0.870589  | -3.177680 | -2.489260 |
| C | -0.646990 | -2.719650 | -3.944180 |
| H | -0.120198 | -5.248310 | -2.304810 |
| O | -2.048110 | -4.802140 | -2.579390 |
| H | -1.956820 | -4.376900 | -0.190777 |
| H | -0.423478 | -5.187860 | 0.053027  |
| H | -0.790784 | -3.110460 | 2.093600  |
| H | -0.600197 | -1.451550 | 1.515000  |
| H | -2.069140 | -2.373100 | 1.122580  |
| C | 2.019790  | -4.103250 | 0.076033  |
| H | -2.689640 | -4.124680 | -2.301010 |
| C | -0.186598 | -1.325780 | -4.422290 |
| C | -0.136672 | -3.824060 | -4.891770 |
| H | -1.742880 | -2.735540 | -3.986270 |
| H | -0.467671 | -3.650000 | -5.919130 |
| H | 0.961461  | -3.855830 | -4.897430 |
| H | -0.513641 | -4.804790 | -4.596000 |
| H | -0.527515 | -0.559308 | -3.719710 |
| H | 0.911731  | -1.270450 | -4.415410 |
| C | -0.698163 | -0.928241 | -5.824380 |
| C | -0.406118 | 0.514357  | -6.146260 |
| H | -0.277707 | -1.588460 | -6.586590 |
| H | -1.787910 | -1.084770 | -5.849250 |
| C | 0.301559  | 1.021930  | -7.171160 |
| C | 0.475502  | 2.515740  | -7.325990 |
| C | 0.968284  | 0.204922  | -8.252670 |
| H | 2.040360  | 0.437641  | -8.305140 |
| H | 0.865115  | -0.872291 | -8.109130 |
| H | 0.548948  | 0.453618  | -9.236920 |
| H | 1.538830  | 2.791970  | -7.323170 |
| H | 0.066801  | 2.862160  | -8.285020 |
| H | -0.022262 | 3.069660  | -6.524880 |
| H | -0.833116 | 1.228700  | -5.439400 |
| H | 3.060440  | -4.048630 | 0.383452  |
| H | 1.707940  | -5.028470 | -0.399968 |
| H | 1.592280  | -2.196240 | 0.788239  |

|   |           |           |           |
|---|-----------|-----------|-----------|
| C | -0.425318 | -2.032940 | -1.456950 |
| C | 0.342483  | -0.714325 | -1.511870 |
| C | -0.607040 | 0.411998  | -1.447830 |
| N | -1.889680 | -0.178370 | -1.495600 |
| C | -1.883320 | -1.547580 | -1.581860 |
| C | -0.264847 | -2.824040 | -0.058666 |
| C | -0.100588 | -3.149390 | -2.507380 |
| C | 1.676130  | -0.574595 | -1.675860 |
| O | -0.428089 | 1.614560  | -1.387430 |
| O | -2.890720 | -2.233700 | -1.716670 |
| H | -2.738820 | 0.372515  | -1.533660 |
| H | 2.315100  | -1.452580 | -1.767860 |
| O | 2.290550  | 0.609309  | -1.776770 |
| C | 3.729730  | 0.600921  | -1.872510 |
| H | 3.974040  | 1.493230  | -2.453420 |
| C | 4.379110  | 0.644690  | -0.497228 |
| H | 4.049360  | -0.280493 | -2.443580 |
| H | 5.467920  | 0.705363  | -0.602080 |
| H | 4.034930  | 1.519870  | 0.061169  |
| H | 4.143230  | -0.252806 | 0.084090  |
| C | 1.206540  | -2.911640 | 0.317381  |
| C | -0.981247 | -2.130060 | 1.118160  |
| C | -0.885016 | -4.197850 | -0.384750 |
| C | -0.731385 | -4.456970 | -1.903210 |
| H | 0.988550  | -3.282710 | -2.450960 |
| C | -0.460626 | -2.941200 | -4.003720 |
| H | -0.063922 | -5.300750 | -2.098100 |
| O | -1.967480 | -4.840450 | -2.492470 |
| H | -1.954040 | -4.175560 | -0.157836 |
| H | -0.454518 | -4.994570 | 0.228027  |
| H | -0.836662 | -2.713680 | 2.033320  |
| H | -0.579827 | -1.126610 | 1.299270  |
| H | -2.058150 | -2.048070 | 0.944409  |
| C | 2.015960  | -3.972620 | 0.237936  |
| H | -2.599940 | -4.122880 | -2.310730 |
| C | 0.042387  | -1.607490 | -4.597800 |
| C | 0.066948  | -4.143320 | -4.812670 |
| H | -1.554080 | -2.946840 | -4.087910 |
| H | -0.218313 | -4.070940 | -5.865480 |
| H | 1.163610  | -4.191440 | -4.768590 |
| H | -0.339782 | -5.083430 | -4.435210 |
| H | -0.306165 | -0.768287 | -3.989710 |
| H | 1.141410  | -1.572230 | -4.555120 |
| C | -0.415312 | -1.338280 | -6.048990 |
| C | 0.049485  | 0.004992  | -6.548690 |
| H | -0.012413 | -2.112860 | -6.714030 |
| H | -1.506120 | -1.426320 | -6.101130 |
| C | -0.686325 | 1.075750  | -6.894930 |
| C | -0.024439 | 2.350480  | -7.365940 |
| C | -2.194920 | 1.137040  | -6.859060 |
| H | -2.658380 | 0.214746  | -6.503850 |
| H | -2.529310 | 1.955340  | -6.207500 |
| H | -2.596130 | 1.351750  | -7.858680 |
| H | -0.361279 | 2.619910  | -8.376230 |
| H | -0.286897 | 3.193690  | -6.712890 |
| H | 1.065750  | 2.261280  | -7.383660 |

|   |          |           |           |
|---|----------|-----------|-----------|
| H | 1.134460 | 0.107202  | -6.619920 |
| H | 3.046170 | -3.912330 | 0.577775  |
| H | 1.695270 | -4.934130 | -0.152512 |
| H | 1.616250 | -1.991700 | 0.732947  |

Conf 267

|   |           |           |           |
|---|-----------|-----------|-----------|
| C | -0.506579 | -2.228930 | -1.254840 |
| C | 0.066140  | -0.813839 | -1.259930 |
| C | -1.036990 | 0.164336  | -1.270980 |
| N | -2.214940 | -0.603703 | -1.408590 |
| C | -2.006230 | -1.957480 | -1.486020 |
| C | -0.333788 | -2.993720 | 0.157411  |
| C | 0.047896  | -3.283510 | -2.272230 |
| C | 1.375380  | -0.484000 | -1.307600 |
| O | -1.037160 | 1.380120  | -1.209200 |
| O | -2.892340 | -2.780510 | -1.689220 |
| H | -3.129240 | -0.180028 | -1.511090 |
| H | 2.137610  | -1.260670 | -1.369090 |
| O | 1.825780  | 0.775028  | -1.271570 |
| C | 3.234490  | 0.979408  | -1.507610 |
| H | 3.797470  | 0.140121  | -1.078260 |
| C | 3.531800  | 1.154500  | -2.989220 |
| H | 3.481360  | 1.882760  | -0.945018 |
| H | 4.596410  | 1.370840  | -3.131090 |
| H | 3.289050  | 0.248661  | -3.554050 |
| H | 2.950090  | 1.983890  | -3.401050 |
| C | 1.104250  | -2.871460 | 0.638587  |
| C | -1.224530 | -2.413360 | 1.275290  |
| C | -0.726171 | -4.440970 | -0.202364 |
| C | -0.428027 | -4.670760 | -1.703660 |
| H | 1.138440  | -3.258160 | -2.140930 |
| C | -0.236656 | -3.127270 | -3.791090 |
| H | 0.366993  | -5.408070 | -1.844070 |
| O | -1.550180 | -5.228150 | -2.376340 |
| H | -1.800980 | -4.572410 | -0.052881 |
| H | -0.231550 | -5.169840 | 0.445407  |
| H | -1.063240 | -2.973000 | 2.202550  |
| H | -0.984898 | -1.363350 | 1.477340  |
| H | -2.286980 | -2.486300 | 1.025160  |
| C | 2.061300  | -3.804690 | 0.619977  |
| H | -2.291740 | -4.611240 | -2.244190 |
| C | 0.099028  | -1.732410 | -4.362050 |
| C | 0.518389  | -4.235000 | -4.553120 |
| H | -1.308650 | -3.296700 | -3.948260 |
| H | 0.301038  | -4.201800 | -5.623970 |
| H | 1.604240  | -4.121040 | -4.431220 |
| H | 0.229174  | -5.226240 | -4.198870 |
| H | -0.397647 | -0.954086 | -3.776500 |
| H | 1.177990  | -1.540050 | -4.262230 |
| C | -0.317484 | -1.527450 | -5.836220 |
| C | -0.011619 | -0.135516 | -6.325450 |
| H | 0.216005  | -2.242480 | -6.475210 |
| H | -1.383130 | -1.759880 | -5.939680 |
| C | -0.867502 | 0.838290  | -6.682090 |
| C | -0.360106 | 2.186200  | -7.140760 |
| C | -2.372500 | 0.713465  | -6.670140 |

|   |           |           |           |
|---|-----------|-----------|-----------|
| H | -2.814560 | 1.478310  | -6.017810 |
| H | -2.782010 | 0.886709  | -7.674370 |
| H | -2.724150 | -0.262013 | -6.329050 |
| H | 0.732967  | 2.231970  | -7.141330 |
| H | -0.711237 | 2.414970  | -8.156150 |
| H | -0.735150 | 2.988810  | -6.491510 |
| H | 1.053620  | 0.099152  | -6.378750 |
| H | 3.044990  | -3.599390 | 1.033080  |
| H | 1.910960  | -4.799250 | 0.209959  |
| H | 1.347320  | -1.906020 | 1.080840  |

Conf 12

|   |           |           |           |
|---|-----------|-----------|-----------|
| C | -0.617408 | -2.087420 | -1.398950 |
| C | 0.075073  | -0.729128 | -1.493580 |
| C | -0.856084 | 0.333336  | -1.071480 |
| N | -2.083560 | -0.320053 | -0.828601 |
| C | -2.062510 | -1.673400 | -1.049670 |
| C | -0.051862 | -3.037370 | -0.222949 |
| C | -0.589725 | -3.044480 | -2.642270 |
| C | 1.334170  | -0.501672 | -1.929380 |
| O | -0.704426 | 1.535300  | -0.949723 |
| O | -3.048330 | -2.397440 | -0.961201 |
| H | -2.925600 | 0.183203  | -0.575976 |
| H | 1.956110  | -1.328260 | -2.269340 |
| O | 1.897800  | 0.710774  | -1.970360 |
| C | 3.195560  | 0.797242  | -2.602850 |
| H | 3.073220  | 0.608539  | -3.676310 |
| C | 3.746610  | 2.186010  | -2.346170 |
| H | 3.849240  | 0.023314  | -2.179480 |
| H | 3.861850  | 2.366970  | -1.273720 |
| H | 4.725470  | 2.288550  | -2.825740 |
| H | 3.077300  | 2.947850  | -2.754980 |
| C | 1.467640  | -3.089010 | -0.279099 |
| C | -0.423733 | -2.537520 | 1.188460  |
| C | -0.709096 | -4.395100 | -0.548840 |
| C | -1.008370 | -4.447140 | -2.067320 |
| H | 0.470890  | -3.133690 | -2.911860 |
| C | -1.381610 | -2.660380 | -3.921380 |
| H | -0.424086 | -5.225830 | -2.565530 |
| O | -2.361830 | -4.808970 | -2.313570 |
| H | -1.662390 | -4.472530 | -0.019934 |
| H | -0.096781 | -5.234260 | -0.207945 |
| H | -0.014182 | -3.219090 | 1.941350  |
| H | -0.009922 | -1.541800 | 1.384210  |
| H | -1.507470 | -2.498990 | 1.331320  |
| C | 2.242720  | -4.076130 | -0.739680 |
| H | -2.916310 | -4.155810 | -1.850820 |
| C | -1.080640 | -1.265630 | -4.522360 |
| C | -1.216760 | -3.757030 | -4.993820 |
| H | -2.443010 | -2.647880 | -3.648150 |
| H | -1.712180 | -3.455090 | -5.923880 |
| H | -0.160999 | -3.941170 | -5.227710 |
| H | -1.666090 | -4.695740 | -4.665030 |
| H | -1.203430 | -0.488641 | -3.760230 |
| H | -1.853770 | -1.061950 | -5.275190 |
| C | 0.293499  | -1.085550 | -5.201430 |

|   |          |           |           |
|---|----------|-----------|-----------|
| C | 0.536190 | 0.345685  | -5.606310 |
| H | 1.085900 | -1.399140 | -4.506350 |
| H | 0.370959 | -1.755420 | -6.061780 |
| C | 0.812645 | 0.840318  | -6.826420 |
| C | 1.002160 | 2.325860  | -7.033690 |
| C | 0.956998 | 0.016099  | -8.083700 |
| H | 1.958360 | 0.144924  | -8.516350 |
| H | 0.796826 | -1.051760 | -7.924010 |
| H | 0.244072 | 0.353690  | -8.847650 |
| H | 0.273701 | 2.717100  | -7.756720 |
| H | 0.887981 | 2.886050  | -6.101160 |
| H | 1.996840 | 2.543990  | -7.446100 |
| H | 0.450899 | 1.064700  | -4.789010 |
| H | 3.325440 | -4.002640 | -0.687131 |
| H | 1.844210 | -4.988790 | -1.173370 |
| H | 1.960720 | -2.216940 | 0.149013  |

Conf 30

|   |           |           |           |
|---|-----------|-----------|-----------|
| C | -0.606888 | -2.143280 | -1.465180 |
| C | 0.087934  | -0.788094 | -1.559090 |
| C | -0.840748 | 0.278300  | -1.145670 |
| N | -2.068560 | -0.371786 | -0.891096 |
| C | -2.048680 | -1.725900 | -1.097970 |
| C | -0.027035 | -3.093080 | -0.297550 |
| C | -0.612731 | -3.097140 | -2.712490 |
| C | 1.360950  | -0.566118 | -1.955520 |
| O | -0.689255 | 1.481330  | -1.033900 |
| O | -3.032960 | -2.450080 | -0.990937 |
| H | -2.907570 | 0.133586  | -0.632933 |
| H | 1.992780  | -1.391640 | -2.275990 |
| O | 1.927140  | 0.644869  | -1.985720 |
| C | 3.258010  | 0.718447  | -2.545510 |
| H | 3.890500  | -0.033122 | -2.055510 |
| C | 3.784610  | 2.120530  | -2.310690 |
| H | 3.199620  | 0.488952  | -3.616700 |
| H | 4.789690  | 2.212880  | -2.734960 |
| H | 3.834620  | 2.342380  | -1.240960 |
| H | 3.136200  | 2.860940  | -2.787040 |
| C | 1.472010  | -3.279410 | -0.461777 |
| C | -0.375964 | -2.584820 | 1.108610  |
| C | -0.699856 | -4.457330 | -0.615619 |
| C | -1.028020 | -4.499640 | -2.130970 |
| H | 0.437665  | -3.189270 | -3.019200 |
| C | -1.425930 | -2.699180 | -3.973800 |
| H | -0.457803 | -5.280980 | -2.640800 |
| O | -2.387170 | -4.852440 | -2.352700 |
| H | -1.638400 | -4.547050 | -0.062330 |
| H | -0.065720 | -5.293070 | -0.303750 |
| H | 0.013657  | -3.271310 | 1.866630  |
| H | 0.049342  | -1.594280 | 1.301920  |
| H | -1.458490 | -2.527060 | 1.248310  |
| C | 2.433240  | -2.976330 | 0.416358  |
| H | -2.928580 | -4.196970 | -1.877560 |
| C | -1.105860 | -1.308700 | -4.575050 |
| C | -1.301360 | -3.795930 | -5.051380 |
| H | -2.481290 | -2.666920 | -3.679800 |

|   |           |           |           |
|---|-----------|-----------|-----------|
| H | -1.809000 | -3.482690 | -5.970980 |
| H | -0.253758 | -3.997970 | -5.306480 |
| H | -1.760220 | -4.727570 | -4.715770 |
| H | -1.876490 | -1.093600 | -5.327200 |
| H | -1.216650 | -0.530556 | -3.812340 |
| C | 0.271206  | -1.147790 | -5.253240 |
| C | 0.532181  | 0.278857  | -5.662630 |
| H | 1.058690  | -1.465140 | -4.554200 |
| H | 0.342750  | -1.822320 | -6.110520 |
| C | 0.800219  | 0.767658  | -6.886840 |
| C | 1.013280  | 2.249470  | -7.097860 |
| C | 0.912844  | -0.059649 | -8.145390 |
| H | 1.909760  | 0.052520  | -8.592710 |
| H | 0.737500  | -1.124690 | -7.982600 |
| H | 0.194503  | 0.288953  | -8.899260 |
| H | 2.006410  | 2.449520  | -7.522990 |
| H | 0.282795  | 2.653200  | -7.811940 |
| H | 0.921046  | 2.812070  | -6.164380 |
| H | 0.471488  | 0.999053  | -4.844300 |
| H | 3.471760  | -3.215890 | 0.205417  |
| H | 2.233310  | -2.492960 | 1.367230  |
| H | 1.777610  | -3.775890 | -1.383410 |

Conf 31

|   |           |           |           |
|---|-----------|-----------|-----------|
| C | -0.607614 | -2.149930 | -1.473160 |
| C | 0.095662  | -0.797428 | -1.538670 |
| C | -0.820687 | 0.263722  | -1.086180 |
| N | -2.049970 | -0.384718 | -0.834496 |
| C | -2.042100 | -1.732860 | -1.078120 |
| C | -0.021196 | -3.135030 | -0.338679 |
| C | -0.634697 | -3.069520 | -2.745780 |
| C | 1.365740  | -0.573550 | -1.943380 |
| O | -0.659535 | 1.462330  | -0.944366 |
| O | -3.030250 | -2.452910 | -0.979254 |
| H | -2.882570 | 0.119180  | -0.553694 |
| H | 1.988110  | -1.394410 | -2.293050 |
| O | 1.940180  | 0.633896  | -1.947410 |
| C | 3.264780  | 0.713437  | -2.520980 |
| H | 3.192250  | 0.512470  | -3.597030 |
| C | 3.803610  | 2.105430  | -2.255900 |
| H | 3.897890  | -0.054816 | -2.058390 |
| H | 3.867510  | 2.298860  | -1.181390 |
| H | 4.804340  | 2.202280  | -2.689340 |
| H | 3.154810  | 2.862260  | -2.705130 |
| C | 1.474490  | -3.327390 | -0.525429 |
| C | -0.350116 | -2.662760 | 1.084760  |
| C | -0.707524 | -4.485480 | -0.685626 |
| C | -1.053440 | -4.484320 | -2.197600 |
| H | 0.411438  | -3.160500 | -3.067030 |
| C | -1.459520 | -2.631800 | -3.986120 |
| H | -0.494930 | -5.255520 | -2.735070 |
| O | -2.417650 | -4.821350 | -2.412860 |
| H | -1.640240 | -4.583640 | -0.123983 |
| H | -0.075906 | -5.333730 | -0.403859 |
| H | 0.043228  | -3.372270 | 1.819290  |
| H | 0.084603  | -1.680810 | 1.299770  |



|   |           |           |           |
|---|-----------|-----------|-----------|
| H | -1.430500 | -2.601270 | 1.238730  |
| C | 2.447980  | -3.055090 | 0.349276  |
| H | -2.948640 | -4.175330 | -1.913630 |
| C | -1.136170 | -1.227780 | -4.553220 |
| C | -1.355610 | -3.699670 | -5.094490 |
| H | -2.511150 | -2.600050 | -3.678930 |
| H | -1.871380 | -3.357750 | -5.999220 |
| H | -0.312565 | -3.902260 | -5.367190 |
| H | -1.817600 | -4.636750 | -4.778920 |
| H | -1.232610 | -0.469842 | -3.768540 |
| H | -1.913610 | -0.986999 | -5.290390 |
| C | 0.234348  | -1.058140 | -5.242520 |
| C | 0.500942  | 0.377229  | -5.616230 |
| H | 1.027240  | -1.399580 | -4.561190 |
| H | 0.291530  | -1.709740 | -6.118390 |
| C | 0.757772  | 0.897307  | -6.829920 |
| C | 0.979192  | 2.382770  | -7.003230 |
| C | 0.848980  | 0.103847  | -8.111780 |
| H | 1.840790  | 0.222107  | -8.568780 |
| H | 0.668899  | -0.964138 | -7.975670 |
| H | 0.123290  | 0.477146  | -8.846550 |
| H | 0.243456  | 2.810870  | -7.697430 |
| H | 0.901924  | 2.920430  | -6.053830 |
| H | 1.968770  | 2.587340  | -7.434440 |
| H | 0.455394  | 1.075300  | -4.777980 |
| H | 3.482200  | -3.296140 | 0.119743  |
| H | 2.262610  | -2.596380 | 1.315180  |
| H | 1.765830  | -3.800710 | -1.463710 |

Conf 19

|   |           |           |           |
|---|-----------|-----------|-----------|
| C | -0.574047 | -2.044570 | -1.424550 |
| C | 0.072034  | -0.665081 | -1.544110 |
| C | -0.884517 | 0.370261  | -1.112270 |
| N | -2.084390 | -0.320347 | -0.836724 |
| C | -2.024130 | -1.674020 | -1.047140 |
| C | 0.045052  | -2.967850 | -0.255242 |
| C | -0.542806 | -3.008780 | -2.662390 |
| C | 1.311600  | -0.398507 | -2.012960 |
| O | -0.768920 | 1.577300  | -1.001050 |
| O | -2.983660 | -2.428770 | -0.930675 |
| H | -2.936720 | 0.157655  | -0.569955 |
| H | 1.962780  | -1.207380 | -2.341310 |
| O | 1.806380  | 0.837733  | -2.137670 |
| C | 3.177520  | 0.958050  | -2.572950 |
| H | 3.395890  | 0.167074  | -3.301500 |
| C | 4.139970  | 0.922568  | -1.395140 |
| H | 3.219910  | 1.919430  | -3.089400 |
| H | 5.164540  | 1.082910  | -1.748280 |
| H | 4.105980  | -0.043270 | -0.880204 |
| H | 3.894270  | 1.708250  | -0.675029 |
| C | 1.564020  | -2.971700 | -0.342452 |
| C | -0.312926 | -2.470560 | 1.160710  |
| C | -0.574753 | -4.348260 | -0.558803 |
| C | -0.905093 | -4.419760 | -2.070130 |
| H | 0.514287  | -3.066750 | -2.953650 |
| C | -1.372550 | -2.656710 | -3.926540 |

|   |           |           |           |
|---|-----------|-----------|-----------|
| H | -0.307561 | -5.183130 | -2.576240 |
| O | -2.251520 | -4.825610 | -2.284190 |
| H | -1.513300 | -4.453030 | -0.008685 |
| H | 0.071646  | -5.165090 | -0.226567 |
| H | 0.133860  | -3.133510 | 1.909030  |
| H | 0.072700  | -1.460730 | 1.341290  |
| H | -1.394100 | -2.465500 | 1.326070  |
| C | 2.361090  | -3.936460 | -0.812743 |
| H | -2.816160 | -4.186960 | -1.813620 |
| C | -1.119800 | -1.260380 | -4.546570 |
| C | -1.204310 | -3.758500 | -4.993210 |
| H | -2.427650 | -2.668170 | -3.629450 |
| H | -1.727980 | -3.477090 | -5.914180 |
| H | -0.149764 | -3.917860 | -5.249570 |
| H | -1.622200 | -4.705230 | -4.646550 |
| H | -1.914650 | -1.083300 | -5.283290 |
| H | -1.244490 | -0.478817 | -3.789470 |
| C | 0.233470  | -1.052960 | -5.259800 |
| C | 0.430222  | 0.378538  | -5.687330 |
| H | 1.050210  | -1.335690 | -4.579730 |
| H | 0.308165  | -1.732010 | -6.113160 |
| C | 0.619628  | 0.867981  | -6.925770 |
| C | 0.778615  | 2.354150  | -7.153310 |
| C | 0.690048  | 0.037689  | -8.185460 |
| H | 0.558812  | -1.031570 | -8.009180 |
| H | -0.079871 | 0.358292  | -8.899890 |
| H | 1.656550  | 0.179780  | -8.687690 |
| H | 1.742630  | 2.580060  | -7.629530 |
| H | 0.001250  | 2.733370  | -7.830420 |
| H | 0.718465  | 2.918700  | -6.218370 |
| H | 0.392129  | 1.100790  | -4.869730 |
| H | 3.441800  | -3.828520 | -0.782823 |
| H | 1.983350  | -4.864110 | -1.232900 |
| H | 2.036880  | -2.081220 | 0.070461  |

Conf 33

|   |           |           |           |
|---|-----------|-----------|-----------|
| C | -0.229314 | -1.843290 | -1.555540 |
| C | 0.703904  | -0.657730 | -1.331590 |
| C | -0.088728 | 0.573623  | -1.168330 |
| N | -1.429960 | 0.187674  | -1.387580 |
| C | -1.598830 | -1.141390 | -1.678400 |
| C | -0.284576 | -2.867670 | -0.310855 |
| C | 0.015125  | -2.798700 | -2.775990 |
| C | 2.054250  | -0.694926 | -1.318010 |
| O | 0.241724  | 1.718800  | -0.918989 |
| O | -2.675690 | -1.650510 | -1.969600 |
| H | -2.193140 | 0.853568  | -1.388710 |
| H | 2.585300  | -1.633210 | -1.470660 |
| O | 2.823260  | 0.388916  | -1.167850 |
| C | 4.245000  | 0.180117  | -1.045050 |
| H | 4.696370  | 1.079860  | -1.469720 |
| C | 4.653590  | -0.009459 | 0.408148  |
| H | 4.539010  | -0.678248 | -1.663560 |
| H | 5.742410  | -0.109582 | 0.477927  |
| H | 4.345200  | 0.851907  | 1.007440  |
| H | 4.197600  | -0.909037 | 0.833683  |

|   |           |           |           |
|---|-----------|-----------|-----------|
| C | 1.113080  | -3.354750 | 0.033192  |
| C | -0.988588 | -2.275810 | 0.918456  |
| C | -1.061300 | -4.071630 | -0.910509 |
| C | -0.829708 | -4.084340 | -2.443610 |
| H | 1.072140  | -3.092750 | -2.708480 |
| C | -0.202876 | -2.282990 | -4.224800 |
| H | -0.269674 | -4.971350 | -2.751610 |
| O | -2.058490 | -4.178500 | -3.151400 |
| H | -2.132510 | -3.949170 | -0.729833 |
| H | -0.763266 | -5.011790 | -0.435950 |
| H | -1.025730 | -3.014940 | 1.724700  |
| H | -0.471164 | -1.388880 | 1.299290  |
| H | -2.019680 | -1.997870 | 0.685274  |
| C | 1.752950  | -3.239080 | 1.201170  |
| H | -2.599020 | -3.415990 | -2.878200 |
| C | 0.562869  | -0.980660 | -4.544540 |
| C | 0.182589  | -3.400400 | -5.214430 |
| H | -1.271580 | -2.083490 | -4.358980 |
| H | -0.006226 | -3.095350 | -6.246760 |
| H | 1.250420  | -3.645800 | -5.130770 |
| H | -0.400507 | -4.305650 | -5.036030 |
| H | 0.310667  | -0.208339 | -3.811610 |
| H | 1.643380  | -1.154540 | -4.435970 |
| C | 0.299695  | -0.384565 | -5.947550 |
| C | -1.134200 | 0.029370  | -6.156970 |
| H | 0.939893  | 0.505514  | -6.041630 |
| H | 0.633322  | -1.074640 | -6.727150 |
| C | -1.961660 | -0.267177 | -7.174350 |
| C | -3.377630 | 0.261247  | -7.199520 |
| C | -1.596550 | -1.117820 | -8.367530 |
| H | -2.278870 | -1.973860 | -8.453870 |
| H | -1.701820 | -0.540891 | -9.296230 |
| H | -0.575673 | -1.502710 | -8.330210 |
| H | -3.555440 | 0.870903  | -8.095870 |
| H | -4.103500 | -0.562426 | -7.232370 |
| H | -3.599830 | 0.874387  | -6.321370 |
| H | -1.535580 | 0.664864  | -5.364380 |
| H | 2.731930  | -3.688530 | 1.343120  |
| H | 1.335770  | -2.711950 | 2.053180  |
| H | 1.614050  | -3.916950 | -0.755453 |

Conf 41

|   |           |           |           |
|---|-----------|-----------|-----------|
| C | -0.394791 | -2.106970 | -1.523260 |
| C | 0.378657  | -0.792853 | -1.560890 |
| C | -0.561829 | 0.338302  | -1.478720 |
| N | -1.849950 | -0.242966 | -1.510840 |
| C | -1.854090 | -1.610000 | -1.605110 |
| C | -0.205006 | -2.926250 | -0.146484 |
| C | -0.118963 | -3.200360 | -2.613600 |
| C | 1.716790  | -0.656260 | -1.685970 |
| O | -0.376024 | 1.539530  | -1.411350 |
| O | -2.868750 | -2.289490 | -1.721380 |
| H | -2.696080 | 0.313554  | -1.525360 |
| H | 2.358510  | -1.532030 | -1.770410 |
| O | 2.336570  | 0.526187  | -1.759280 |
| C | 3.778580  | 0.518823  | -1.775970 |

|   |           |           |           |
|---|-----------|-----------|-----------|
| H | 4.055020  | 1.397400  | -2.363630 |
| C | 4.348880  | 0.594625  | -0.367535 |
| H | 4.129460  | -0.375739 | -2.307330 |
| H | 5.442490  | 0.644700  | -0.411641 |
| H | 3.981090  | 1.487360  | 0.146229  |
| H | 4.068370  | -0.284487 | 0.221316  |
| C | 1.270600  | -3.173850 | 0.118647  |
| C | -0.882185 | -2.245890 | 1.051590  |
| C | -0.852143 | -4.296100 | -0.487337 |
| C | -0.743875 | -4.516840 | -2.018020 |
| H | 0.970736  | -3.343110 | -2.615370 |
| C | -0.527872 | -2.947620 | -4.090710 |
| H | -0.090752 | -5.362080 | -2.250760 |
| O | -1.999850 | -4.875050 | -2.578700 |
| H | -1.912140 | -4.282230 | -0.220050 |
| H | -0.389828 | -5.106720 | 0.084526  |
| H | -0.749990 | -2.851030 | 1.953840  |
| H | -0.464491 | -1.252910 | 1.248710  |
| H | -1.957580 | -2.139270 | 0.887118  |
| C | 1.981020  | -2.801910 | 1.188150  |
| H | -2.619350 | -4.156070 | -2.360440 |
| C | -0.007372 | -1.611740 | -4.664800 |
| C | -0.058591 | -4.140640 | -4.947550 |
| H | -1.623200 | -2.923260 | -4.136790 |
| H | -0.378766 | -4.033860 | -5.987260 |
| H | 1.037580  | -4.215160 | -4.944720 |
| H | -0.474655 | -5.080200 | -4.579310 |
| H | -0.315925 | -0.780324 | -4.025480 |
| H | 1.093000  | -1.606220 | -4.651970 |
| C | -0.497911 | -1.292970 | -6.095030 |
| C | -0.012277 | 0.050778  | -6.573110 |
| H | -0.133547 | -2.059610 | -6.790780 |
| H | -1.591690 | -1.352230 | -6.118590 |
| C | -0.729345 | 1.147920  | -6.872840 |
| C | -0.047670 | 2.417580  | -7.328920 |
| C | -2.234400 | 1.245740  | -6.795190 |
| H | -2.712340 | 0.324530  | -6.456700 |
| H | -2.530590 | 2.051040  | -6.109800 |
| H | -2.655470 | 1.502070  | -7.776650 |
| H | -0.402351 | 2.720300  | -8.323570 |
| H | -0.273015 | 3.250200  | -6.649000 |
| H | 1.039210  | 2.302460  | -7.376100 |
| H | 1.072740  | 0.127856  | -6.670100 |
| H | 3.021780  | -3.096350 | 1.291280  |
| H | 1.564910  | -2.208830 | 1.996190  |
| H | 1.779570  | -3.780870 | -0.630673 |

Conf 301

|   |           |           |           |
|---|-----------|-----------|-----------|
| C | -0.459765 | -2.337470 | -1.371240 |
| C | 0.092889  | -0.918226 | -1.294680 |
| C | -1.020360 | 0.044423  | -1.231290 |
| N | -2.193480 | -0.729770 | -1.383320 |
| C | -1.971450 | -2.073320 | -1.536450 |
| C | -0.228112 | -3.187570 | -0.018526 |
| C | 0.057000  | -3.315770 | -2.482900 |
| C | 1.397820  | -0.568470 | -1.297950 |

|   |           |           |           |
|---|-----------|-----------|-----------|
| O | -1.034930 | 1.254960  | -1.102650 |
| O | -2.853720 | -2.896970 | -1.755670 |
| H | -3.115320 | -0.313448 | -1.435310 |
| H | 2.174120  | -1.325530 | -1.398230 |
| O | 1.828320  | 0.691481  | -1.176120 |
| C | 3.241210  | 0.924821  | -1.349110 |
| H | 3.799840  | 0.073329  | -0.938882 |
| C | 3.590610  | 1.175950  | -2.808450 |
| H | 3.453980  | 1.802820  | -0.734847 |
| H | 4.656600  | 1.411820  | -2.899990 |
| H | 3.381600  | 0.296106  | -3.425700 |
| H | 3.013070  | 2.017490  | -3.201160 |
| C | 1.248510  | -3.212980 | 0.339363  |
| C | -1.079590 | -2.683150 | 1.155140  |
| C | -0.624756 | -4.621830 | -0.459961 |
| C | -0.383160 | -4.743890 | -1.986400 |
| H | 1.153490  | -3.283720 | -2.414750 |
| C | -0.296736 | -3.057370 | -3.973170 |
| H | 0.411977  | -5.461510 | -2.205450 |
| O | -1.525720 | -5.268100 | -2.649740 |
| H | -1.688440 | -4.788190 | -0.269871 |
| H | -0.076979 | -5.378460 | 0.110447  |
| H | -0.906089 | -3.302320 | 2.040680  |
| H | -0.841846 | -1.646970 | 1.417960  |
| H | -2.145870 | -2.741560 | 0.921377  |
| C | 1.823960  | -2.769380 | 1.461300  |
| H | -2.266450 | -4.669370 | -2.446740 |
| C | 0.027738  | -1.627470 | -4.457870 |
| C | 0.415265  | -4.112530 | -4.843490 |
| H | -1.376000 | -3.209650 | -4.092840 |
| H | 0.148332  | -4.004380 | -5.898030 |
| H | 1.506390  | -4.009490 | -4.766010 |
| H | 0.137054  | -5.124940 | -4.545000 |
| H | -0.439381 | -0.889773 | -3.800160 |
| H | 1.111340  | -1.448840 | -4.385810 |
| C | -0.442035 | -1.317550 | -5.897170 |
| C | -0.151779 | 0.106204  | -6.295790 |
| H | 0.066850  | -1.984490 | -6.604720 |
| H | -1.511150 | -1.542830 | -5.978470 |
| C | -1.018500 | 1.098660  | -6.563660 |
| C | -0.525521 | 2.476970  | -6.940390 |
| C | -2.522470 | 0.967592  | -6.523620 |
| H | -2.956840 | 1.206600  | -7.503630 |
| H | -2.863720 | -0.029967 | -6.240740 |
| H | -2.949930 | 1.685020  | -5.810540 |
| H | -0.886040 | 3.231320  | -6.228120 |
| H | 0.567101  | 2.526860  | -6.964560 |
| H | -0.902245 | 2.773940  | -7.928600 |
| H | 0.911305  | 0.348189  | -6.358510 |
| H | 2.890250  | -2.897770 | 1.625310  |
| H | 1.270560  | -2.274330 | 2.252800  |
| H | 1.892220  | -3.707140 | -0.388988 |

Conf 7

|   |           |           |           |
|---|-----------|-----------|-----------|
| C | -0.271818 | -1.875490 | -1.514310 |
| C | 0.627585  | -0.644240 | -1.431860 |

|   |           |           |           |
|---|-----------|-----------|-----------|
| C | -0.203706 | 0.573589  | -1.408520 |
| N | -1.529520 | 0.124661  | -1.591370 |
| C | -1.655930 | -1.233620 | -1.738940 |
| C | -0.322243 | -2.745480 | -0.156280 |
| C | 0.034297  | -2.967780 | -2.596010 |
| C | 1.978150  | -0.641003 | -1.460240 |
| O | 0.092698  | 1.748410  | -1.287330 |
| O | -2.712690 | -1.803160 | -1.987630 |
| H | -2.310110 | 0.763259  | -1.685060 |
| H | 2.530310  | -1.578070 | -1.527750 |
| O | 2.717670  | 0.474313  | -1.452360 |
| C | 4.149910  | 0.315746  | -1.389890 |
| H | 4.548600  | 1.195130  | -1.900880 |
| C | 4.640420  | 0.246190  | 0.048740  |
| H | 4.440530  | -0.576059 | -1.960440 |
| H | 5.734530  | 0.193500  | 0.066310  |
| H | 4.326760  | 1.134870  | 0.603765  |
| H | 4.249390  | -0.639009 | 0.561134  |
| C | 1.091020  | -3.005950 | 0.342962  |
| C | -1.072010 | -2.037550 | 0.991241  |
| C | -1.044160 | -4.029690 | -0.614320 |
| C | -0.781529 | -4.227040 | -2.127430 |
| H | 1.093780  | -3.220210 | -2.450300 |
| C | -0.159355 | -2.645790 | -4.102740 |
| H | -0.190423 | -5.127550 | -2.315120 |
| O | -1.992260 | -4.443260 | -2.841510 |
| H | -2.121650 | -3.907910 | -0.476994 |
| H | -0.751120 | -4.896450 | -0.015643 |
| H | -1.072390 | -2.676320 | 1.880650  |
| H | -0.590415 | -1.091650 | 1.263810  |
| H | -2.114330 | -1.834750 | 0.728744  |
| C | 1.795220  | -4.139990 | 0.271011  |
| H | -2.560960 | -3.671670 | -2.670360 |
| C | 0.559142  | -1.359090 | -4.565350 |
| C | 0.296330  | -3.860980 | -4.935000 |
| H | -1.232370 | -2.512940 | -4.277230 |
| H | 0.124368  | -3.699170 | -6.002760 |
| H | 1.370360  | -4.047680 | -4.798720 |
| H | -0.253775 | -4.761110 | -4.654670 |
| H | 0.218800  | -0.508314 | -3.968330 |
| H | 1.637970  | -1.456600 | -4.373080 |
| C | 0.367300  | -0.975866 | -6.054300 |
| C | -1.070000 | -0.777968 | -6.464090 |
| H | 0.948881  | -0.066715 | -6.237520 |
| H | 0.815286  | -1.748490 | -6.692600 |
| C | -1.703980 | 0.374987  | -6.745130 |
| C | -3.161100 | 0.378468  | -7.147340 |
| C | -1.069250 | 1.744800  | -6.701340 |
| H | -1.135820 | 2.232000  | -7.683500 |
| H | -1.604980 | 2.394040  | -5.996190 |
| H | -0.019049 | 1.728140  | -6.404260 |
| H | -3.759800 | 0.986643  | -6.455770 |
| H | -3.292740 | 0.820159  | -8.144560 |
| H | -3.582400 | -0.630784 | -7.163630 |
| H | -1.661650 | -1.691280 | -6.535690 |
| H | 2.789550  | -4.205190 | 0.704061  |

|   |          |           |           |
|---|----------|-----------|-----------|
| H | 1.419150 | -5.041240 | -0.204471 |
| H | 1.548830 | -2.156710 | 0.849096  |
